# Supplementary material for: Iron-catalyzed alkynylation of tertiary aliphatic amines with 1-iodoalkynes to synthesize propargylamines
Source: Royal Society of Chemistry journal article supplement (doi:10.1039/c8qo01028e), 2018-01-01

## Supporting Information

### Iron-Catalyzed Alkynylation of Aliphatic Tertiary Amines with 1-iodoalkynes to Propargylamines

Lina Ma, Xiaolin Shi, Xiaowei Li and Dayong Shi\*

#### Table of Contents

|                                                                           |    |
|---------------------------------------------------------------------------|----|
| 1. General information                                                    | S2 |
| 2. General procedure and characterization data for product <b>3</b>       | S2 |
| 3. References                                                             | S9 |
| 3. Copies of $^1\text{H}$ , $^{13}\text{C}$ NMR spectra for new compounds | S9 |

## 1. General Information

$^1\text{H}$  NMR spectra were recorded on Bruker 500 MHz spectrometer and the chemical shifts were reported in parts per million ( $\delta$ ) relative to internal standard TMS (0 ppm) for  $\text{CDCl}_3$ . The peak patterns are indicated as follows: s, singlet; d, doublet; dd, doublet of doublet; t, triplet; m, multiplet; q, quartet. The coupling constants,  $J$ , are reported in Hertz (Hz).  $^{13}\text{C}$  NMR spectra were obtained at Bruker 125 MHz and referenced to the internal solvent signals (central peak is 77.0 ppm in  $\text{CDCl}_3$ ). The NMR yield was determined by  $^1\text{H}$  NMR using  $\text{CH}_2\text{Br}_2$  as an internal standard. APEX II (Bruker Inc.) was used for ESI-HRMS. IR spectra were recorded by a Nicolet 5MX-S infrared spectrometer. Flash column chromatography was performed over silica gel 200-300. All reagents were weighed and handled in air at room temperature. All chemical reagents were purchased from Alfa, Acros, Aldrich, and TCI, J&K and used without further purification.

## 2. General procedure and characterization data for product 3

To a mixture of tertiary aliphatic amine **1** (1.0 mmol), 1-iodoalkynes **2** (0.20 mmol) and  $\text{FeCl}_2$  (2.6 mg, 10 mol%), MeCN (1.0 mL) was added under nitrogen at room temperature. *tert*-Butyl hydroperoxide (TBHP-decan) (1.0 mmol) was dropped into the mixture under nitrogen at room temperature. The resulting mixture was stirred at 120  $^\circ\text{C}$  for 12 h. After the mixture was cooled to room temperature, the solvent was removed under reduced pressure. The crude product was purified by flash column chromatography on silica gel (ethyl acetate/petroleum ether) to give the product **3** as yellow oil.

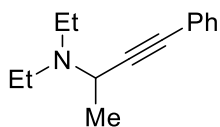

*N,N*-diethyl-4-phenylbut-3-yn-2-amine (**3a**)<sup>[1]</sup>. (35 mg, 86%). Isolated by flash column chromatography (ethyl acetate/petroleum ether = 1:5,  $R_f$  = 0.3); IR (neat):  $\nu_{\text{max}}$  2972, 2931, 2871, 2817, 1489, 1443, 1381, 1302, 1184, 1095, 1069, 1049, 765, 691  $\text{cm}^{-1}$ ;  $^1\text{H}$  NMR (500 MHz,  $\text{CDCl}_3$ )  $\delta$  7.38–7.27 (m, 2H), 7.24–7.14 (m, 3H), 3.81 (q,  $J$  = 7.0 Hz, 1H), 2.72–2.58 (m, 2H), 2.49–2.36 (m, 2H), 1.33 (d,  $J$  = 7.0 Hz, 3H), 1.03 (t,  $J$  = 7.0 Hz, 6H);  $^{13}\text{C}$  NMR (125 MHz,  $\text{CDCl}_3$ )  $\delta$  131.5, 128.1, 127.6, 123.4, 89.4, 84.0,

48.2, 44.6, 20.1, 13.6; HRMS (ESI) calcd for C<sub>14</sub>H<sub>19</sub>N [M +H<sup>+</sup>], 202.1590; found: 202.1598.

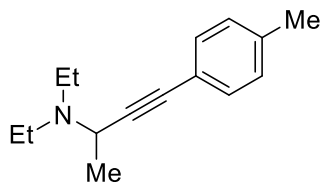

***N,N*-diethyl-4-(*p*-tolyl)but-3-yn-2-amine (3b).** (35 mg, 81%). Isolated by flash column chromatography (ethyl acetate/petroleum ether = 1:5, R<sub>f</sub> = 0.3); IR (neat):  $\nu_{\max}$  2989, 2956, 1656, 1509, 1467, 1302, 1255, 1186, 1095, 815, 732, 525 cm<sup>-1</sup>; <sup>1</sup>H NMR (500 MHz, CDCl<sub>3</sub>)  $\delta$  7.30 (d, *J* = 8.0 Hz, 2H), 7.09 (d, *J* = 8.0 Hz, 2H), 3.89 (q, *J* = 7.0 Hz, 1H), 2.78–2.67 (m, 2H), 2.56–2.46 (m, 2H), 2.33 (s, 3H), 1.41 (d, *J* = 7.0 Hz, 3H), 1.11 (t, *J* = 7.0 Hz, 6H); <sup>13</sup>C NMR (125 MHz, CDCl<sub>3</sub>)  $\delta$  137.7, 131.5, 128.9, 120.4, 88.7, 84.1, 48.3, 44.6, 21.4, 20.1, 13.6; HRMS (ESI) calcd for C<sub>15</sub>H<sub>21</sub>N [M +H<sup>+</sup>], 216.1747; found: 216.1754.

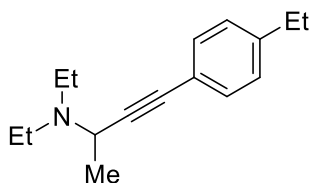

***N,N*-diethyl-4-(4-ethylphenyl)but-3-yn-2-amine (3c).** (35 mg, 76%). Isolated by flash column chromatography (ethyl acetate/petroleum ether = 1:5, R<sub>f</sub> = 0.3); IR (neat):  $\nu_{\max}$  2966, 1661, 1509, 1456, 1379, 1302, 1185, 1095, 832, 731, 539 cm<sup>-1</sup>; <sup>1</sup>H NMR (500 MHz, CDCl<sub>3</sub>)  $\delta$  7.33 (d, *J* = 8.0 Hz, 2H), 7.12 (d, *J* = 8.0 Hz, 2H), 3.89 (q, *J* = 7.0 Hz, 1H), 2.79–2.67 (m, 2H), 2.63 (q, *J* = 7.5 Hz, 2H), 2.57–2.45 (m, 2H), 1.41 (d, *J* = 7.0 Hz, 3H), 1.21 (t, *J* = 7.5 Hz, 3H), 1.11 (t, *J* = 7.0 Hz, 6H); <sup>13</sup>C NMR (125 MHz, CDCl<sub>3</sub>)  $\delta$  144.1, 131.6, 127.7, 120.6, 88.7, 84.1, 48.3, 44.6, 28.7, 20.2, 15.4, 13.6; HRMS (ESI) calcd for C<sub>16</sub>H<sub>23</sub>N [M +H<sup>+</sup>], 230.1903; found: 230.1911.

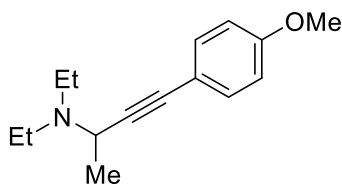

***N,N*-diethyl-4-(4-methoxyphenyl)but-3-yn-2-amine (3d).** (36 mg, 78%). Isolated by flash column chromatography (ethyl acetate/petroleum ether = 1:5, R<sub>f</sub> = 0.3); IR

(neat):  $\nu_{\max}$  2969, 2930, 2836, 1607, 1509, 1465, 1379, 1289, 1246, 1172, 1095, 1034, 831, 792  $\text{cm}^{-1}$ ;  $^1\text{H}$  NMR (500 MHz,  $\text{CDCl}_3$ )  $\delta$  7.34 (d,  $J = 8.5$  Hz, 2H), 6.81 (d,  $J = 8.5$  Hz, 2H), 3.88 (q,  $J = 7.0$  Hz, 1H), 3.79 (s, 3H), 2.77–2.67 (m, 2H), 2.56–2.45 (m, 2H), 1.40 (d,  $J = 7.0$  Hz, 3H), 1.10 (t,  $J = 7.0$  Hz, 6H);  $^{13}\text{C}$  NMR (125 MHz,  $\text{CDCl}_3$ )  $\delta$  159.2, 133.0, 115.6, 113.8, 87.9, 83.7, 55.2, 48.3, 44.6, 20.2, 13.6; HRMS (ESI) calcd for  $\text{C}_{15}\text{H}_{21}\text{NO}$  [ $\text{M} + \text{H}^+$ ], 232.1696; found: 232.1702.

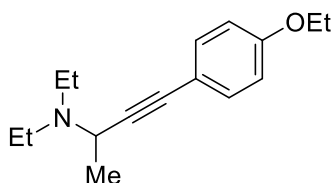

**4-(4-ethoxyphenyl)-*N,N*-diethylbut-3-yn-2-amine (3e).** (36 mg, 73%). Isolated by flash column chromatography (ethyl acetate/petroleum ether = 1:5,  $R_f = 0.3$ ); IR (neat):  $\nu_{\max}$  2975, 2929, 1606, 1508, 1476, 1380, 1286, 1245, 1172, 1115, 1094, 1048, 922, 834, 534  $\text{cm}^{-1}$ ;  $^1\text{H}$  NMR (500 MHz,  $\text{CDCl}_3$ )  $\delta$  7.32 (d,  $J = 8.5$  Hz, 2H), 6.80 (d,  $J = 8.5$  Hz, 2H), 4.01 (q,  $J = 7.0$  Hz, 2H), 3.88 (q,  $J = 7.0$  Hz, 1H), 2.79–2.64 (m, 2H), 2.56–2.42 (m, 2H), 1.40 (t,  $J = 7.0$  Hz, 6H), 1.10 (t,  $J = 7.0$  Hz, 6H);  $^{13}\text{C}$  NMR (125 MHz,  $\text{CDCl}_3$ )  $\delta$  158.5, 133.0, 115.5, 114.3, 87.8, 83.8, 63.4, 48.3, 44.6, 20.2, 14.7, 13.7; HRMS (ESI) calcd for  $\text{C}_{16}\text{H}_{23}\text{NO}$  [ $\text{M} + \text{H}^+$ ], 246.1852; found: 246.1861.

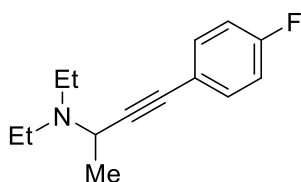

***N,N*-diethyl-4-(4-fluorophenyl)but-3-yn-2-amine (3f).** (33 mg, 76%). Isolated by flash column chromatography (ethyl acetate/petroleum ether = 1:5,  $R_f = 0.3$ ); IR (neat):  $\nu_{\max}$  2925, 1601, 1507, 1468, 1379, 1303, 1231, 1155, 1093, 835, 527  $\text{cm}^{-1}$ ;  $^1\text{H}$  NMR (500 MHz,  $\text{CDCl}_3$ )  $\delta$  7.42–7.33 (m, 2H), 7.01–6.93 (m, 2H), 3.88 (q,  $J = 7.0$  Hz, 1H), 2.79–2.65 (m, 2H), 2.55–2.43 (m, 2H), 1.40 (d,  $J = 7.0$  Hz, 3H), 1.10 (t,  $J = 7.0$  Hz, 6H);  $^{13}\text{C}$  NMR (125 MHz,  $\text{CDCl}_3$ )  $\delta$  162.2 (d,  $J = 246.2$  Hz), 133.4 (d,  $J = 8.8$  Hz), 119.6, 115.4 (d,  $J = 21.2$  Hz), 89.2, 82.9, 48.2, 44.6, 20.0, 13.7; HRMS (ESI) calcd for  $\text{C}_{14}\text{H}_{18}\text{FN}$  [ $\text{M} + \text{H}^+$ ], 220.1496; found: 220.1505.

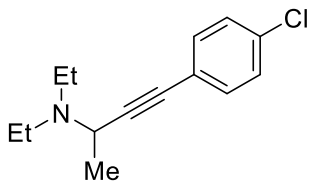

**4-(4-chlorophenyl)-*N,N*-diethylbut-3-yn-2-amine (3g).** (41 mg, 87%). Isolated by flash column chromatography (ethyl acetate/petroleum ether = 1:5,  $R_f = 0.3$ ); IR (neat):  $\nu_{\max}$  2971, 2928, 1488, 1467, 1380, 1301, 1251, 1185, 1091, 1014, 827, 751, 521  $\text{cm}^{-1}$ ;  $^1\text{H}$  NMR (500 MHz,  $\text{CDCl}_3$ )  $\delta$  7.32 (d,  $J = 8.5$  Hz, 2H), 7.25 (d,  $J = 8.5$  Hz, 2H), 3.88 (q,  $J = 7.0$  Hz, 1H), 2.77–2.65 (m, 2H), 2.53–2.44 (m, 2H), 1.40 (d,  $J = 7.0$  Hz, 3H), 1.10 (t,  $J = 7.0$  Hz, 6H);  $^{13}\text{C}$  NMR (125 MHz,  $\text{CDCl}_3$ )  $\delta$  133.7, 132.8, 128.5, 122.0, 90.6, 82.9, 48.3, 44.6, 19.9, 13.6; HRMS (ESI) calcd for  $\text{C}_{14}\text{H}_{18}\text{ClN}$  [ $\text{M} + \text{H}^+$ ], 236.1201; found: 236.1208.

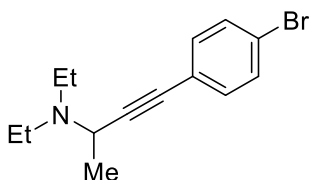

**4-(4-bromophenyl)-*N,N*-diethylbut-3-yn-2-amine (3h).** (37 mg, 66%). Isolated by flash column chromatography (ethyl acetate/petroleum ether = 1:5,  $R_f = 0.3$ ); IR (neat):  $\nu_{\max}$  2971, 2929, 1486, 1379, 1301, 1251, 1185, 1095, 1069, 822, 744, 521  $\text{cm}^{-1}$ ;  $^1\text{H}$  NMR (500 MHz,  $\text{CDCl}_3$ )  $\delta$  7.41 (d,  $J = 8.5$  Hz, 2H), 7.26 (d,  $J = 8.5$  Hz, 2H), 3.88 (q,  $J = 7.0$  Hz, 1H), 2.77–2.63 (m, 2H), 2.54–2.42 (m, 2H), 1.40 (d,  $J = 7.0$  Hz, 3H), 1.10 (t,  $J = 7.0$  Hz, 6H);  $^{13}\text{C}$  NMR (125 MHz,  $\text{CDCl}_3$ )  $\delta$  133.1, 131.4, 122.4, 121.9, 90.9, 83.0, 48.3, 44.7, 20.0, 13.7; HRMS (ESI) calcd for  $\text{C}_{14}\text{H}_{18}\text{BrN}$  [ $\text{M} + \text{H}^+$ ], 280.0695; found: 280.0707.

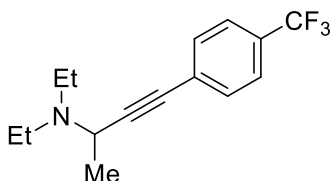

**4-(4-ethoxyphenyl)-*N,N*-diethylbut-3-yn-2-amine (3i).** (36 mg, 66%). Isolated by flash column chromatography (ethyl acetate/petroleum ether = 1:5,  $R_f = 0.3$ ); IR (neat):  $\nu_{\max}$  2921, 2851, 1632, 1469, 1323, 1168, 1131, 1066, 841  $\text{cm}^{-1}$ ;  $^1\text{H}$  NMR (500 MHz,

CDCl<sub>3</sub>)  $\delta$  7.54 (d,  $J = 8.0$  Hz, 2H), 7.50 (d,  $J = 8.0$  Hz, 2H), 3.91 (q,  $J = 7.0$  Hz, 1H), 2.79–2.67 (m, 2H), 2.56–2.44 (m, 2H), 1.42 (d,  $J = 7.0$  Hz, 3H), 1.11 (t,  $J = 7.0$  Hz, 6H); <sup>13</sup>C NMR (125 MHz, CDCl<sub>3</sub>)  $\delta$  131.9, 129.5(q,  $J = 32.5$  Hz), 127.7, 125.1(q,  $J = 3.8$  Hz), 124.0 (q,  $J = 270.3$  Hz), 92.4, 82.9, 48.3, 44.7, 19.9, 13.7; HRMS (ESI) calcd for C<sub>15</sub>H<sub>18</sub>F<sub>3</sub>N [M + H<sup>+</sup>], 270.1464; found: 270.1477.

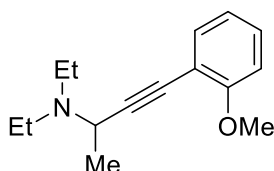

***N,N*-diethyl-4-(2-methoxyphenyl)but-3-yn-2-amine (3j).** (36 mg, 78%). Isolated by flash column chromatography (ethyl acetate/petroleum ether = 1:5,  $R_f = 0.3$ ); IR (neat):  $\nu_{\max}$  2968, 2928, 2850, 1633, 1596, 1492, 1463, 1433, 1379, 1293, 1260, 1182, 1095, 1026, 751, 621 cm<sup>-1</sup>; <sup>1</sup>H NMR (500 MHz, CDCl<sub>3</sub>)  $\delta$  7.41–7.33 (m, 1H), 7.29–7.20 (m, 1H), 6.92–6.81 (m, 2H), 3.95 (q,  $J = 7.0$  Hz, 1H), 3.85 (s, 3H), 2.79–2.67 (m, 2H), 2.60–2.48 (m, 2H), 1.43 (d,  $J = 7.0$  Hz, 3H), 1.11 (t,  $J = 7.0$  Hz, 6H); <sup>13</sup>C NMR (125 MHz, CDCl<sub>3</sub>)  $\delta$  159.9, 133.5, 129.1, 120.3, 112.7, 110.7, 93.8, 80.1, 55.7, 48.6, 44.6, 20.2, 13.7; HRMS (ESI) calcd for C<sub>15</sub>H<sub>21</sub>NO [M + H<sup>+</sup>], 232.1696; found: 232.1705.

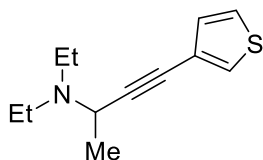

***N,N*-diethyl-4-(thiophen-3-yl)but-3-yn-2-amine (3k).** (30 mg, 72%). Isolated by flash column chromatography (ethyl acetate/petroleum ether = 1:2,  $R_f = 0.3$ ); IR (neat):  $\nu_{\max}$  2969, 2927, 1660, 1519, 1468, 1379, 1261, 1186, 1095, 959, 779, 626 cm<sup>-1</sup>; <sup>1</sup>H NMR (500 MHz, CDCl<sub>3</sub>)  $\delta$  7.42–7.30 (m, 1H), 7.30–7.17 (m, 1H), 7.13–7.02 (m, 1H), 3.88 (q,  $J = 7.0$  Hz, 1H), 2.78–2.66 (m, 2H), 2.56–2.42 (m, 2H), 1.40 (d,  $J = 7.0$  Hz, 3H), 1.10 (t,  $J = 7.0$  Hz, 6H); <sup>13</sup>C NMR (125 MHz, CDCl<sub>3</sub>)  $\delta$  130.0, 127.9, 125.0, 122.4, 89.0, 78.9, 48.3, 44.6, 20.0, 13.7.; HRMS (ESI) calcd for C<sub>12</sub>H<sub>17</sub>NS [M + H<sup>+</sup>], 208.1154; found: 208.1161.

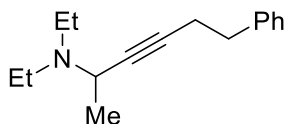

***N,N*-diethyl-6-phenylhex-3-yn-2-amine (3l).** (36 mg, 78%). Isolated by flash column chromatography (ethyl acetate/petroleum ether = 1:5,  $R_f$  = 0.3); IR (neat):  $\nu_{\max}$  2966, 2922, 2850, 1632, 1455, 1383, 1186, 1086, 747, 697  $\text{cm}^{-1}$ ;  $^1\text{H}$  NMR (500 MHz,  $\text{CDCl}_3$ )  $\delta$  7.33–7.24 (m, 2H), 7.26–7.15 (m, 3H), 3.63 (q,  $J$  = 7.0 Hz, 1H), 2.84–2.76 (m, 2H), 2.64–2.54 (m, 2H), 2.52–2.46 (m, 2H), 2.38–2.26 (m, 2H), 1.27 (d,  $J$  = 7.0 Hz, 3H), 1.03 (t,  $J$  = 7.0 Hz, 6H);  $^{13}\text{C}$  NMR (125 MHz,  $\text{CDCl}_3$ )  $\delta$  140.8, 128.5, 128.2, 126.1, 83.0, 80.4, 47.7, 44.4, 35.5, 20.8, 20.2, 13.6; HRMS (ESI) calcd for  $\text{C}_{16}\text{H}_{23}\text{N}$  [ $\text{M} + \text{H}^+$ ], 230.1903; found: 230.1911.

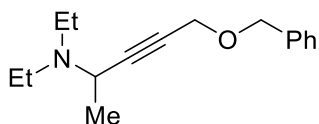

**5-(benzyloxy)-*N,N*-diethylpent-3-yn-2-amine (3m).** (32 mg, 65%). Isolated by flash column chromatography (ethyl acetate/petroleum ether = 1:1,  $R_f$  = 0.3); IR (neat):  $\nu_{\max}$  2969, 2925, 2851, 1632, 1455, 1381, 1302, 1261, 1202, 1073, 1027, 736, 698  $\text{cm}^{-1}$ ;  $^1\text{H}$  NMR (500 MHz,  $\text{CDCl}_3$ )  $\delta$  7.40–7.27 (m, 5H), 4.60 (s, 2H), 4.20 (s, 2H), 3.75 (q,  $J$  = 7.0 Hz, 1H), 2.75–2.62 (m, 2H), 2.48–2.36 (m, 2H), 1.34 (d,  $J$  = 7.0 Hz, 3H), 1.08 (t,  $J$  = 7.0 Hz, 6H);  $^{13}\text{C}$  NMR (125 MHz,  $\text{CDCl}_3$ )  $\delta$  137.6, 128.4, 128.1, 127.8, 86.4, 79.4, 71.3, 57.5, 47.8, 44.6, 20.1, 13.7; HRMS (ESI) calcd for  $\text{C}_{16}\text{H}_{23}\text{NO}$  [ $\text{M} + \text{H}^+$ ], 246.1852; found: 246.1859.

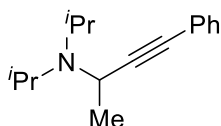

***N,N*-diisopropyl-4-phenylbut-3-yn-2-amine (3n)** <sup>[1]</sup>. (36 mg, 79%). Isolated by flash column chromatography (ethyl acetate/petroleum ether = 1:5,  $R_f$  = 0.3);  $^1\text{H}$  NMR (500 MHz,  $\text{CDCl}_3$ )  $\delta$  7.33–7.27 (m, 2H), 7.24–7.16 (m, 3H), 3.82 (q,  $J$  = 7.0 Hz, 1H), 3.24–3.13 (m, 2H), 1.29 (d,  $J$  = 7.0 Hz, 3H), 1.11 (d,  $J$  = 6.5 Hz, 6H), 0.98 (d,  $J$  = 6.5 Hz, 6H);  $^{13}\text{C}$  NMR (125 MHz,  $\text{CDCl}_3$ )  $\delta$  131.3, 128.2, 127.4, 124.1, 94.5, 81.9, 46.0,

41.6, 24.1, 23.7, 20.5;

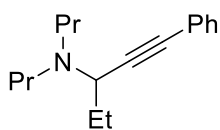

**1-phenyl-*N,N*-dipropylpent-1-yn-3-amine (3o)**<sup>[1]</sup>. (32 mg, 66%). Isolated by flash column chromatography (ethyl acetate/petroleum ether = 1:5,  $R_f$  = 0.3);  $^1\text{H}$  NMR (500 MHz,  $\text{CDCl}_3$ )  $\delta$  7.45–7.37 (m, 2H), 7.32–7.21 (m, 3H), 3.52 (t,  $J$  = 7.5 Hz, 1H), 2.60–2.47 (m, 2H), 2.48–2.36 (m, 2H), 1.78–1.63 (m, 2H), 1.59–1.37 (m, 4H), 1.04 (t,  $J$  = 7.0 Hz, 3H), 0.90 (t,  $J$  = 7.0 Hz, 6H);  $^{13}\text{C}$  NMR (125 MHz,  $\text{CDCl}_3$ )  $\delta$  131.7, 128.2, 127.6, 123.7, 89.2, 84.4, 56.0, 53.6, 27.4, 21.7, 12.0, 11.4;

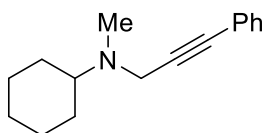

***N*-methyl-*N*-(3-phenylprop-2-yn-1-yl)cyclohexanamine (3p)**<sup>[1]</sup>. (30 mg, 66%). Isolated by flash column chromatography (ethyl acetate/petroleum ether = 1:5,  $R_f$  = 0.3);  $^1\text{H}$  NMR (500 MHz,  $\text{CDCl}_3$ )  $\delta$  7.47–7.38 (m, 2H), 7.34–7.26 (m, 3H), 3.63 (s, 2H), 2.49–2.36 (m, 4H), 2.01–1.92 (m, 2H), 1.83–1.74 (m, 2H), 1.66–1.56 (m, 1H), 1.34–1.11 (m, 5H);  $^{13}\text{C}$  NMR (125 MHz,  $\text{CDCl}_3$ )  $\delta$  131.6, 128.2, 127.9, 123.4, 85.6, 84.8, 61.0, 43.7, 38.5, 29.8, 26.1, 25.5;

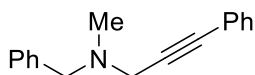

***N*-benzyl-*N*-methyl-3-phenylprop-2-yn-1-amine (3q)**<sup>[2]</sup>. (25 mg, 53%). Isolated by flash column chromatography (ethyl acetate/petroleum ether = 1:5,  $R_f$  = 0.6);  $^1\text{H}$  NMR (500 MHz,  $\text{CDCl}_3$ )  $\delta$  7.54–7.24 (m, 10H), 3.65 (s, 2H), 3.53 (s, 2H), 2.42 (s, 3H);  $^{13}\text{C}$  NMR (125 MHz,  $\text{CDCl}_3$ )  $\delta$  138.4, 131.7, 129.2, 128.4, 128.3, 128.0, 127.2, 123.3, 85.7, 84.4, 60.2, 45.7, 42.0;

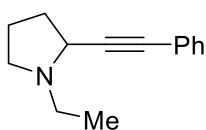

**1-ethyl-2-(phenylethynyl)pyrrolidine (3r)**. (26 mg, 66%). Isolated by flash column chromatography (ethyl acetate/petroleum ether = 1:5,  $R_f$  = 0.3); IR (neat):  $\nu_{\text{max}}$  2922,



2850, 1631, 1468, 755, 532  $\text{cm}^{-1}$ ;  $^1\text{H}$  NMR (500 MHz,  $\text{CDCl}_3$ )  $\delta$  7.47–7.38 (m, 2H), 7.33–7.21 (m, 3H), 3.64–3.53 (m, 1H), 3.03–2.92 (m, 1H), 2.93–2.84 (m, 1H), 2.57–2.38 (m, 2H), 2.25–2.14 (m, 1H), 2.11–1.89 (m, 2H), 1.89–1.77 (m, 1H), 1.18 (t,  $J = 7.0$  Hz, 3H);  $^{13}\text{C}$  NMR (125 MHz,  $\text{CDCl}_3$ )  $\delta$  131.7, 128.2, 127.9, 123.3, 88.6, 84.4, 54.9, 51.5, 47.4, 31.8, 22.0, 13.7; HRMS (ESI) calcd for  $\text{C}_{14}\text{H}_{17}\text{N}$  [ $\text{M} + \text{H}^+$ ], 200.1434; found: 200.1443.

### 3. References

- (1) J. Xie, S. Shi, T. Zhang, N. Mehrkens, M. Rudolph, A. S. K. Hashmi, *Angew. Chem. Int. Ed.* 2015, **54**, 6046.
- (2) Z.-P. Li, C.-J. Li, *J. Am. Chem. Soc.* 2004, **126**, 11810.

### 4. Copies of $^1\text{H}$ , $^{13}\text{C}$ NMR spectra for new compounds

PROTON\_01  
M-3ap

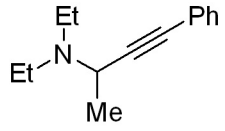

7.33  
7.32  
7.32  
7.31  
7.21  
7.21  
7.20  
7.19  
7.19  
7.18  
7.18

3.83  
3.82  
3.80  
3.79  
2.67  
2.65  
2.64  
2.63  
2.61  
2.44  
2.43  
2.42  
1.33  
1.32  
1.04  
1.03  
1.01

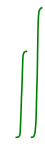

E (m)  
7.18  
D (m)  
7.32  
HH

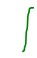

A (q)  
3.81  
H

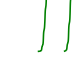

C (m)  
2.42  
B (m)  
2.65  
HH

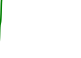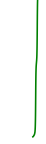

G (t)  
1.03  
F (d)  
1.33  
H H

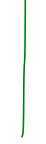

1.98  
2.98

1.00

2.20  
2.30

3.42  
6.56

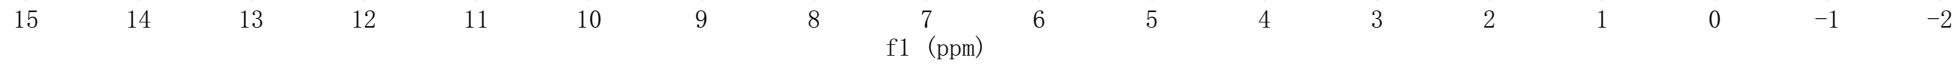

CARBON\_01  
M-3ap

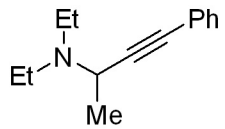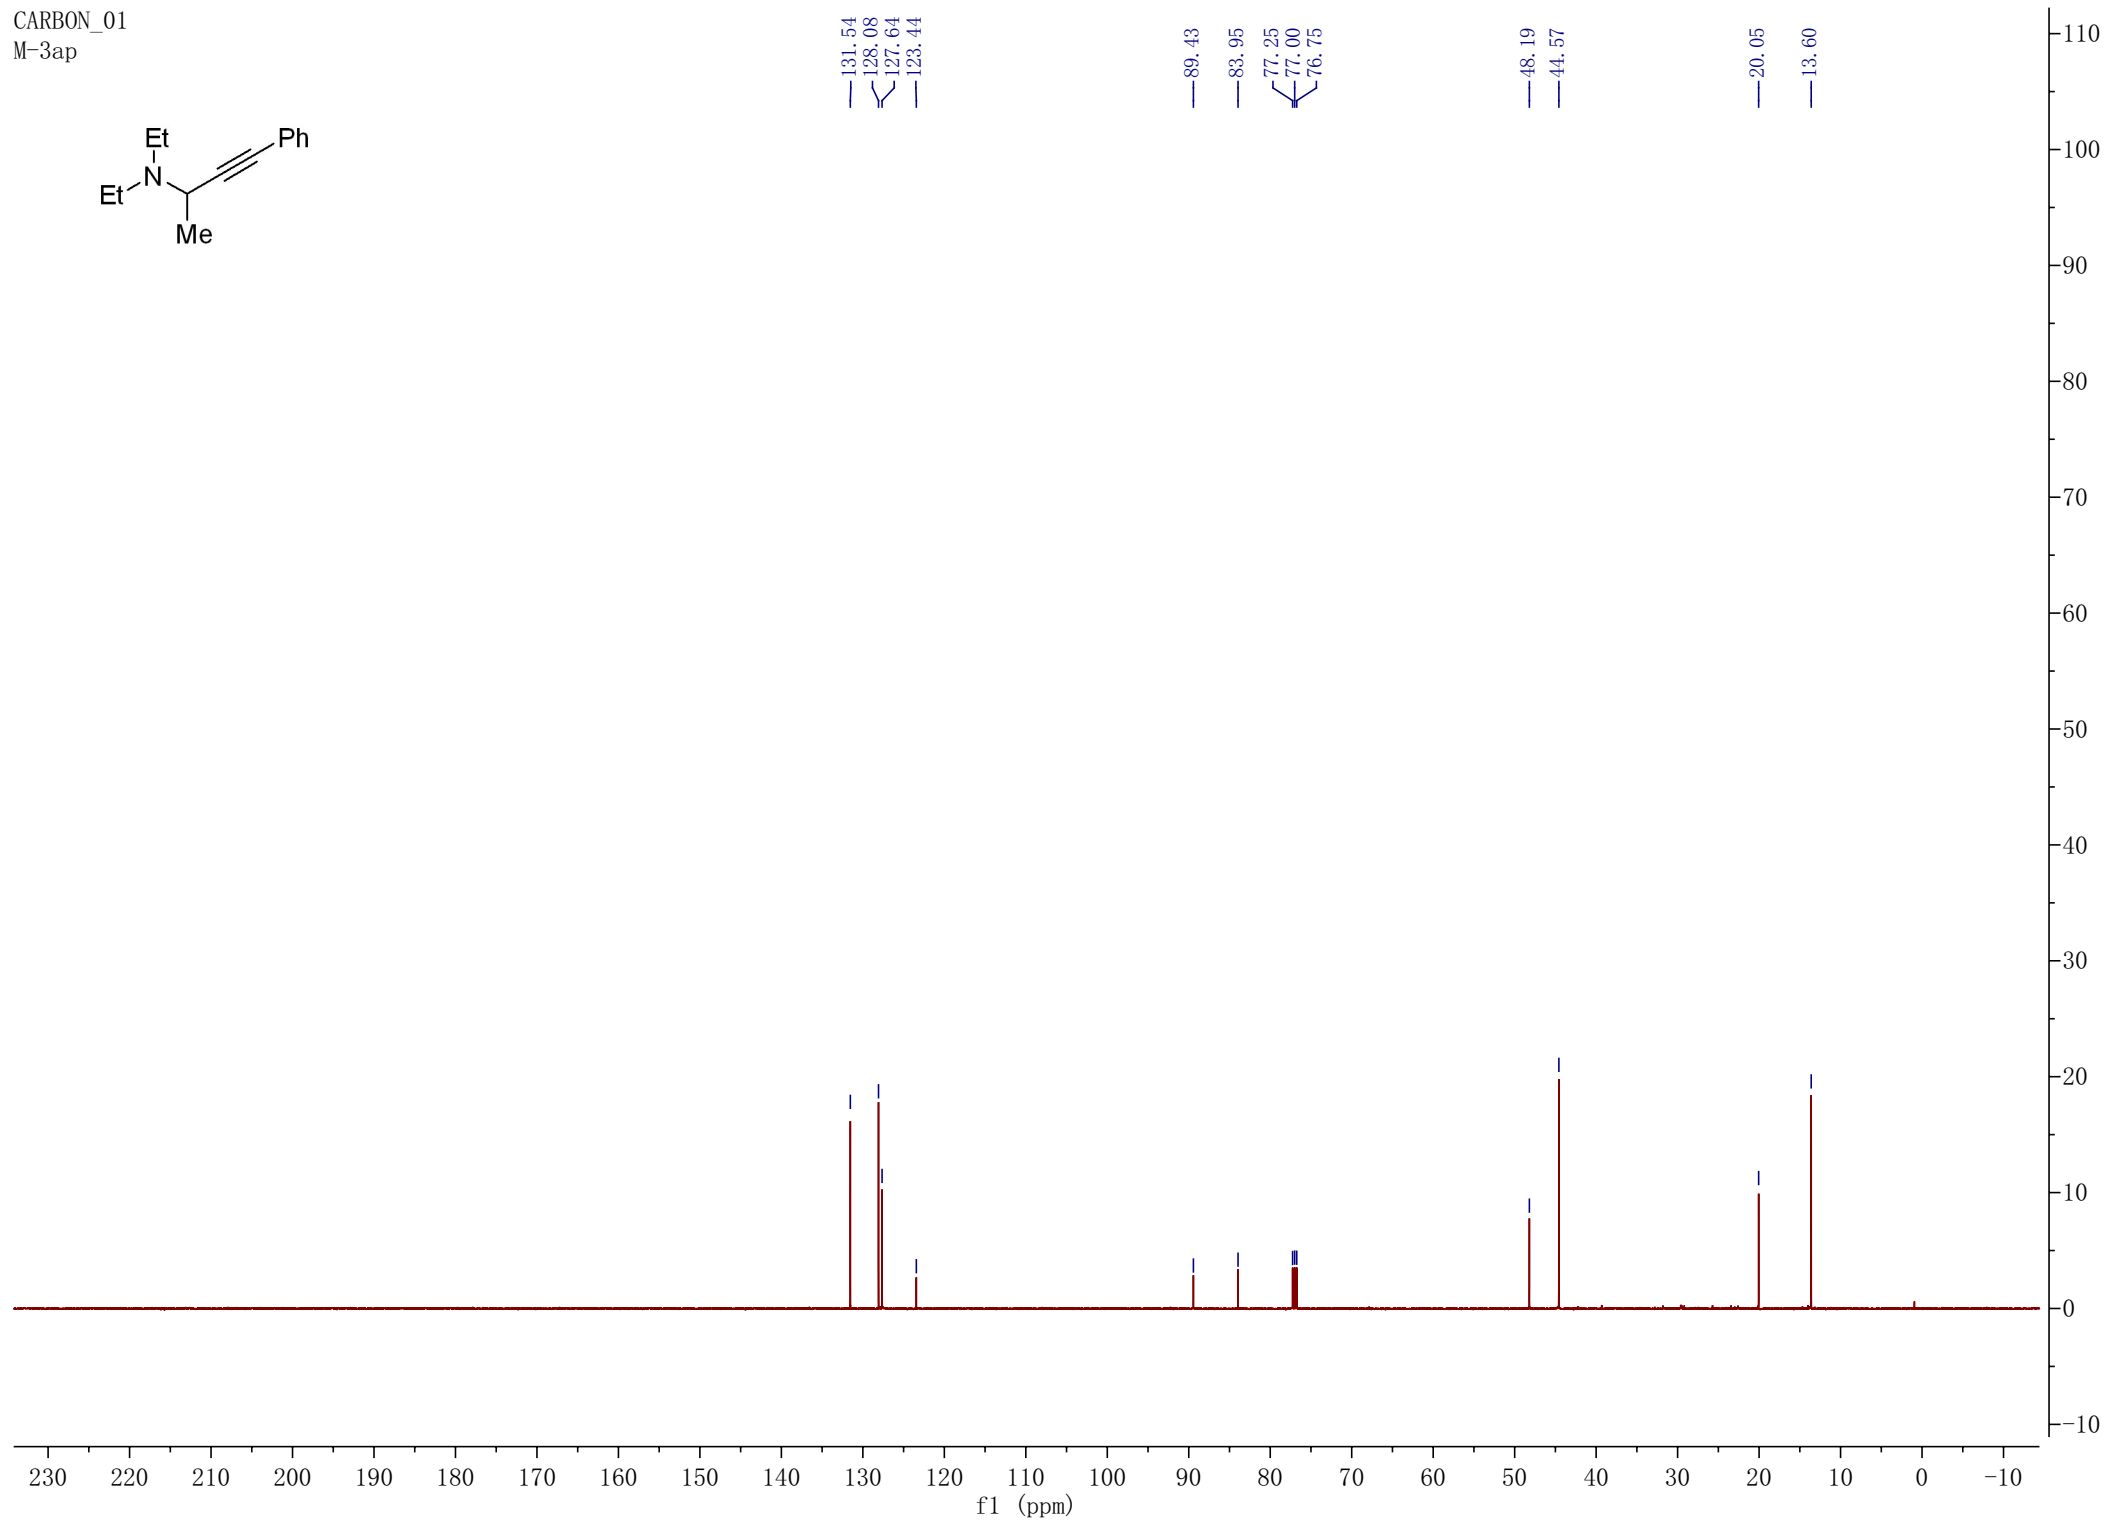

PROTON\_01  
M-103-1p

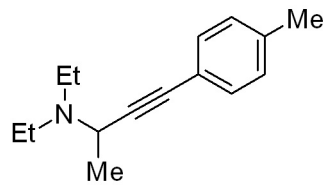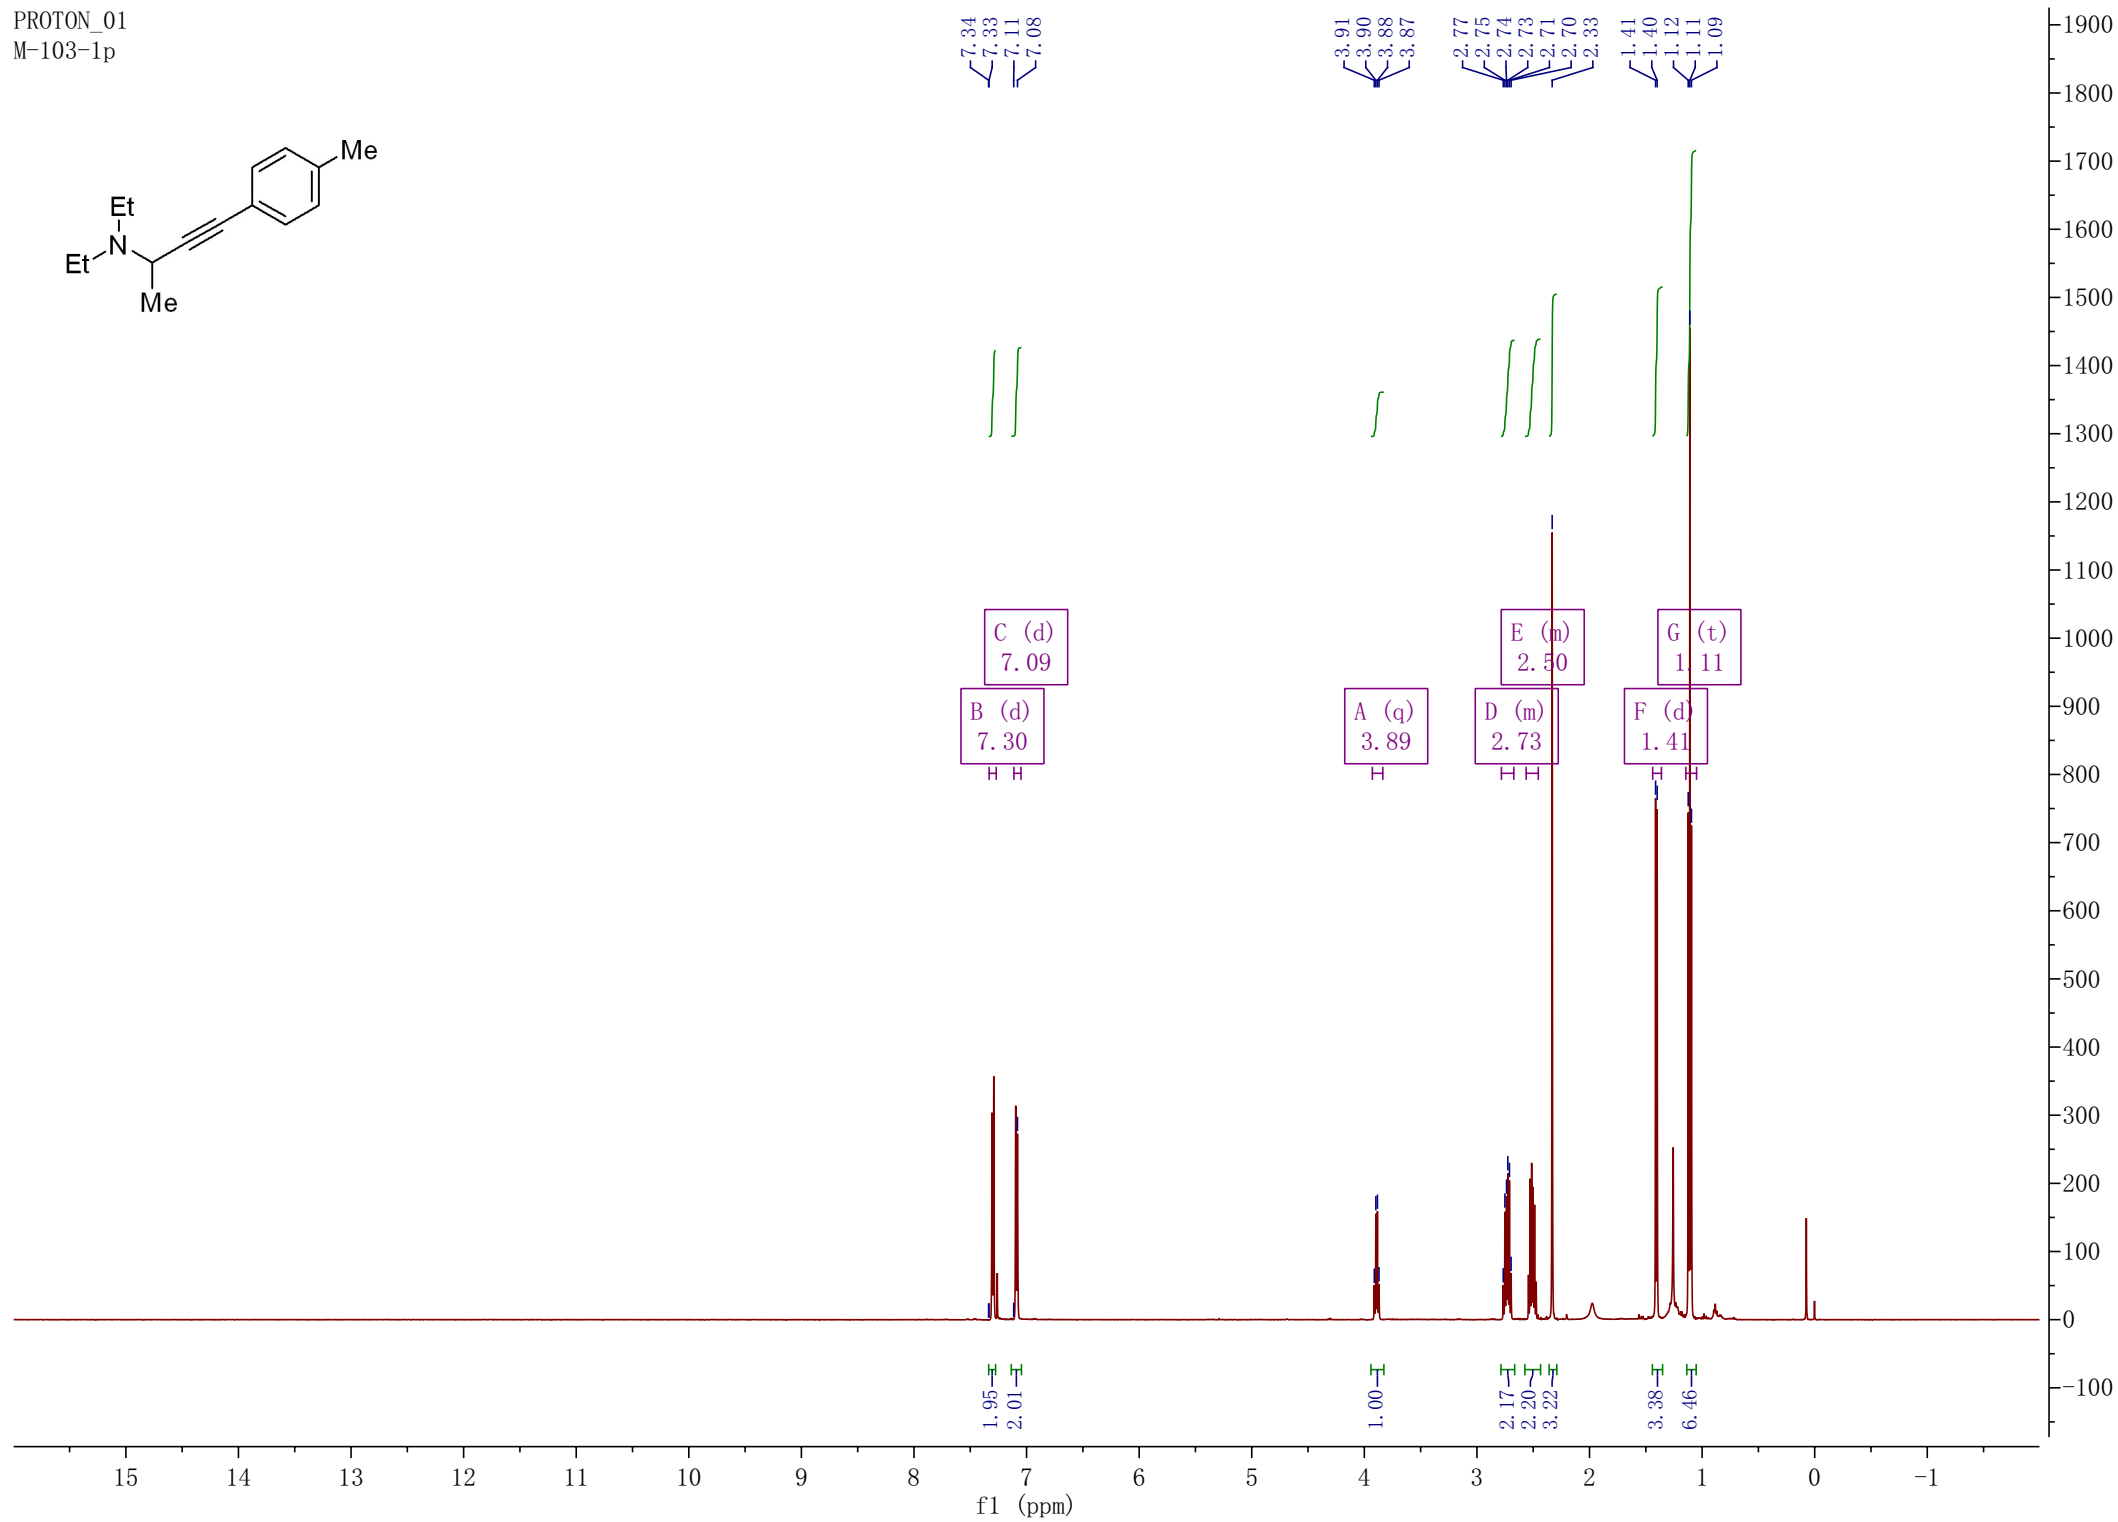

CARBON\_01  
M-103-1p

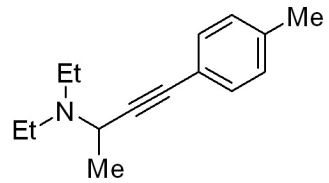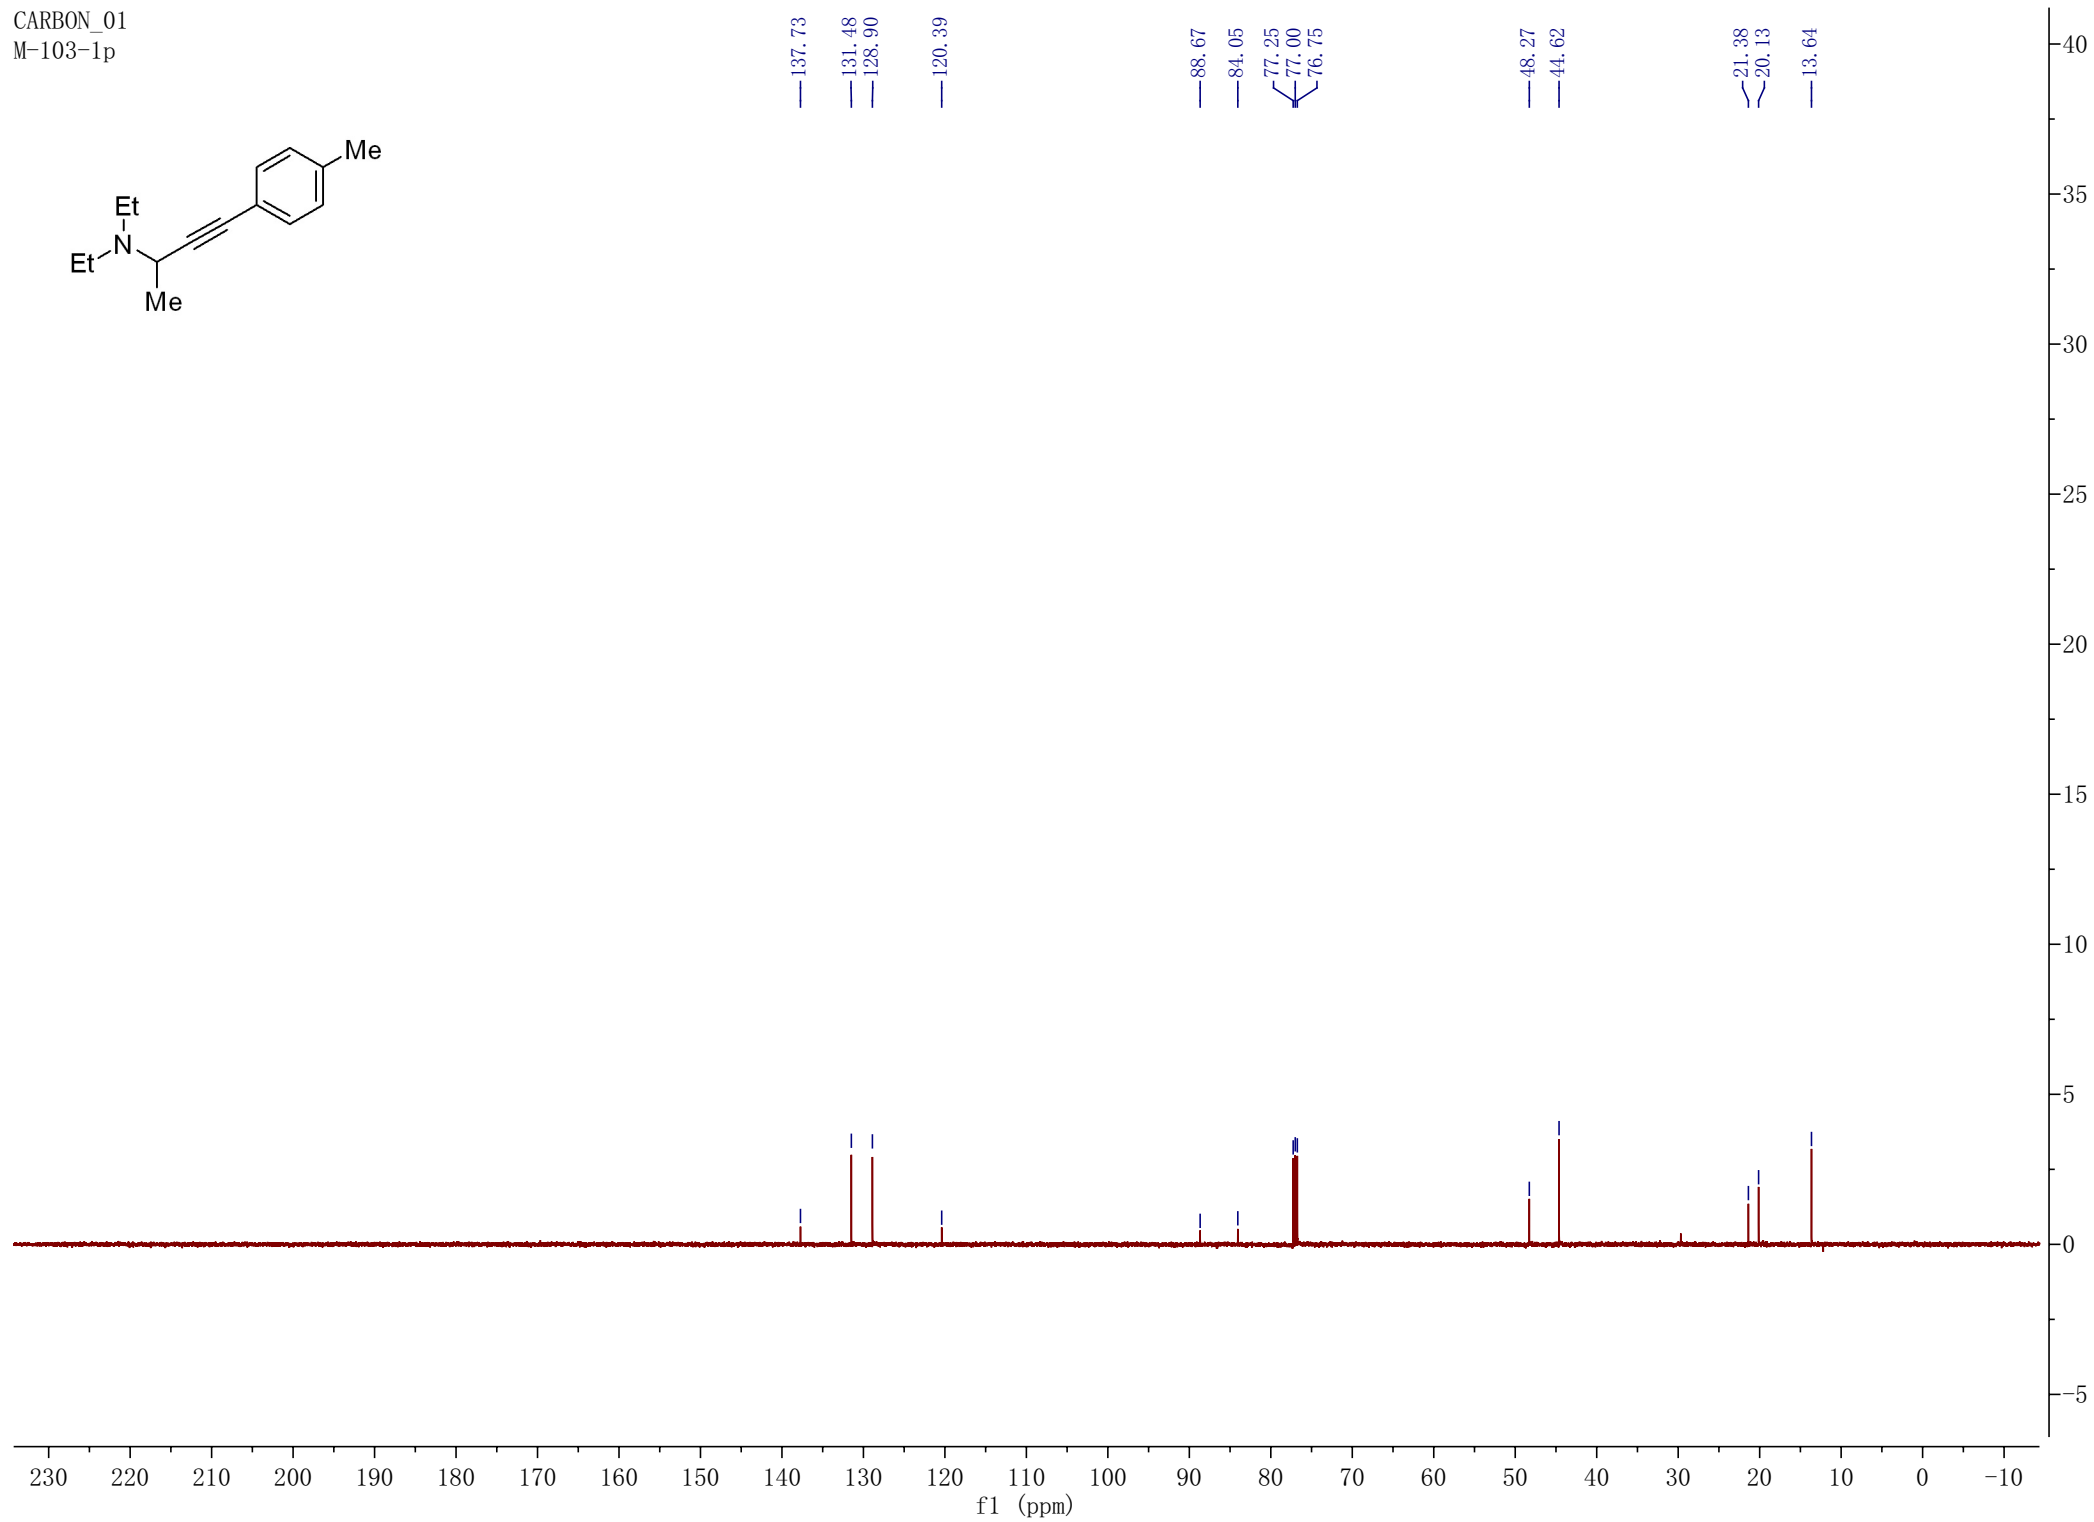

PROTON\_01  
M-103-5p

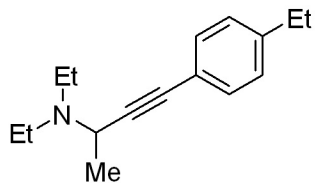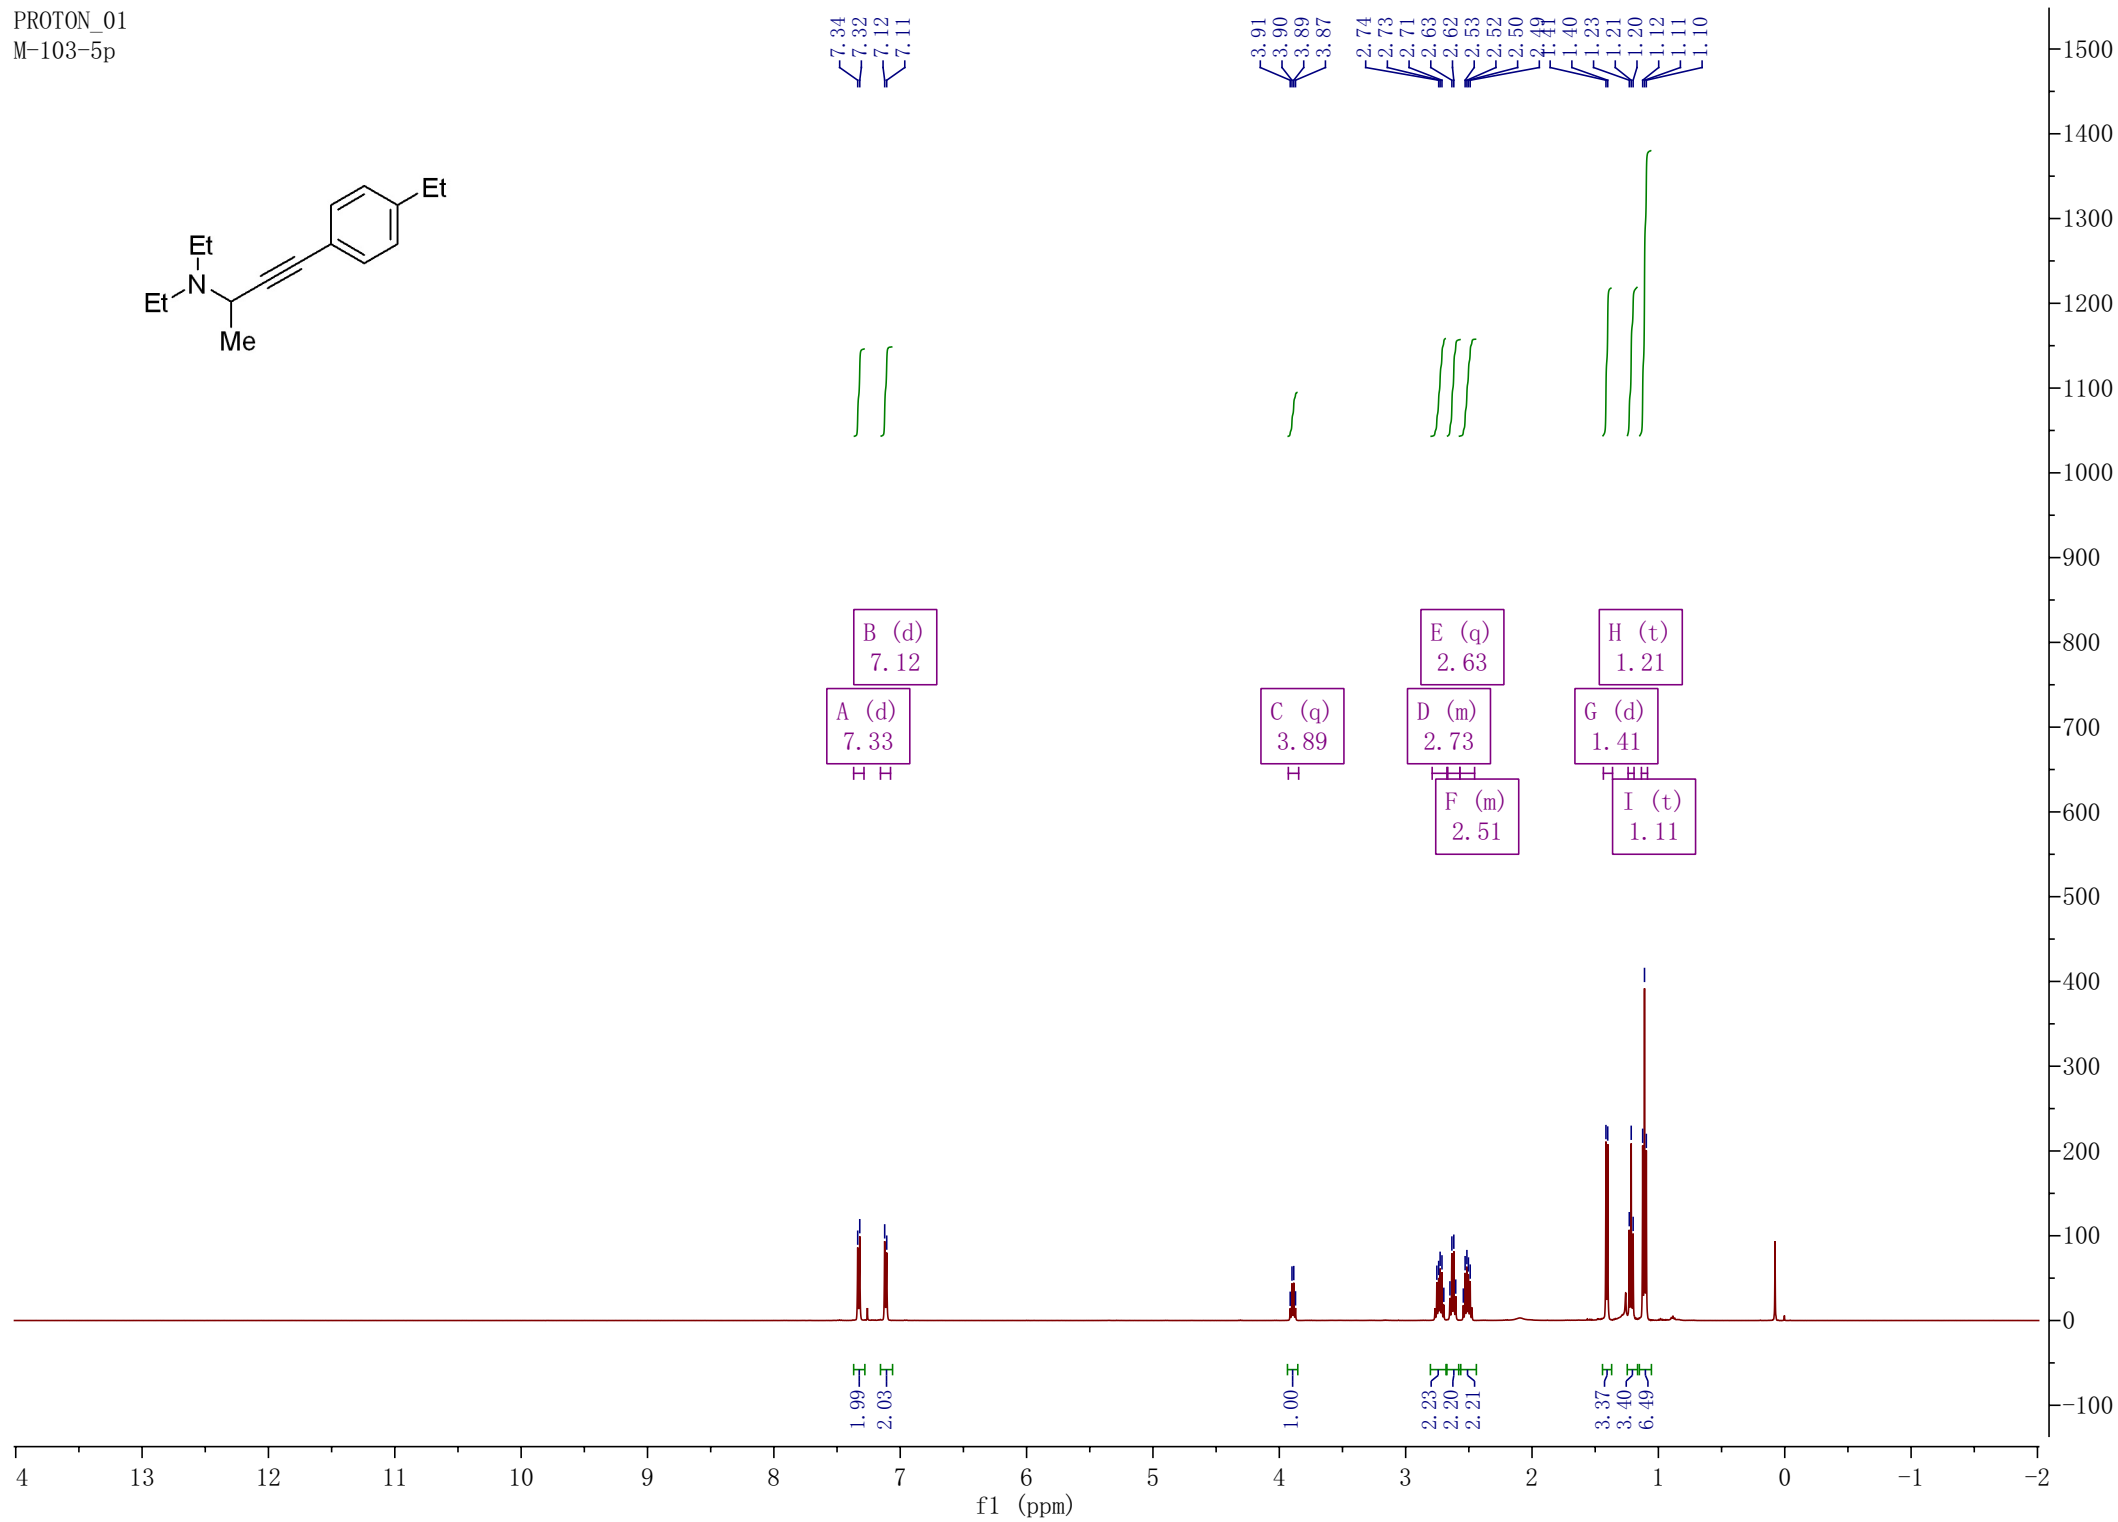

CARBON\_01  
M-103-5p

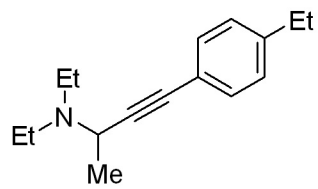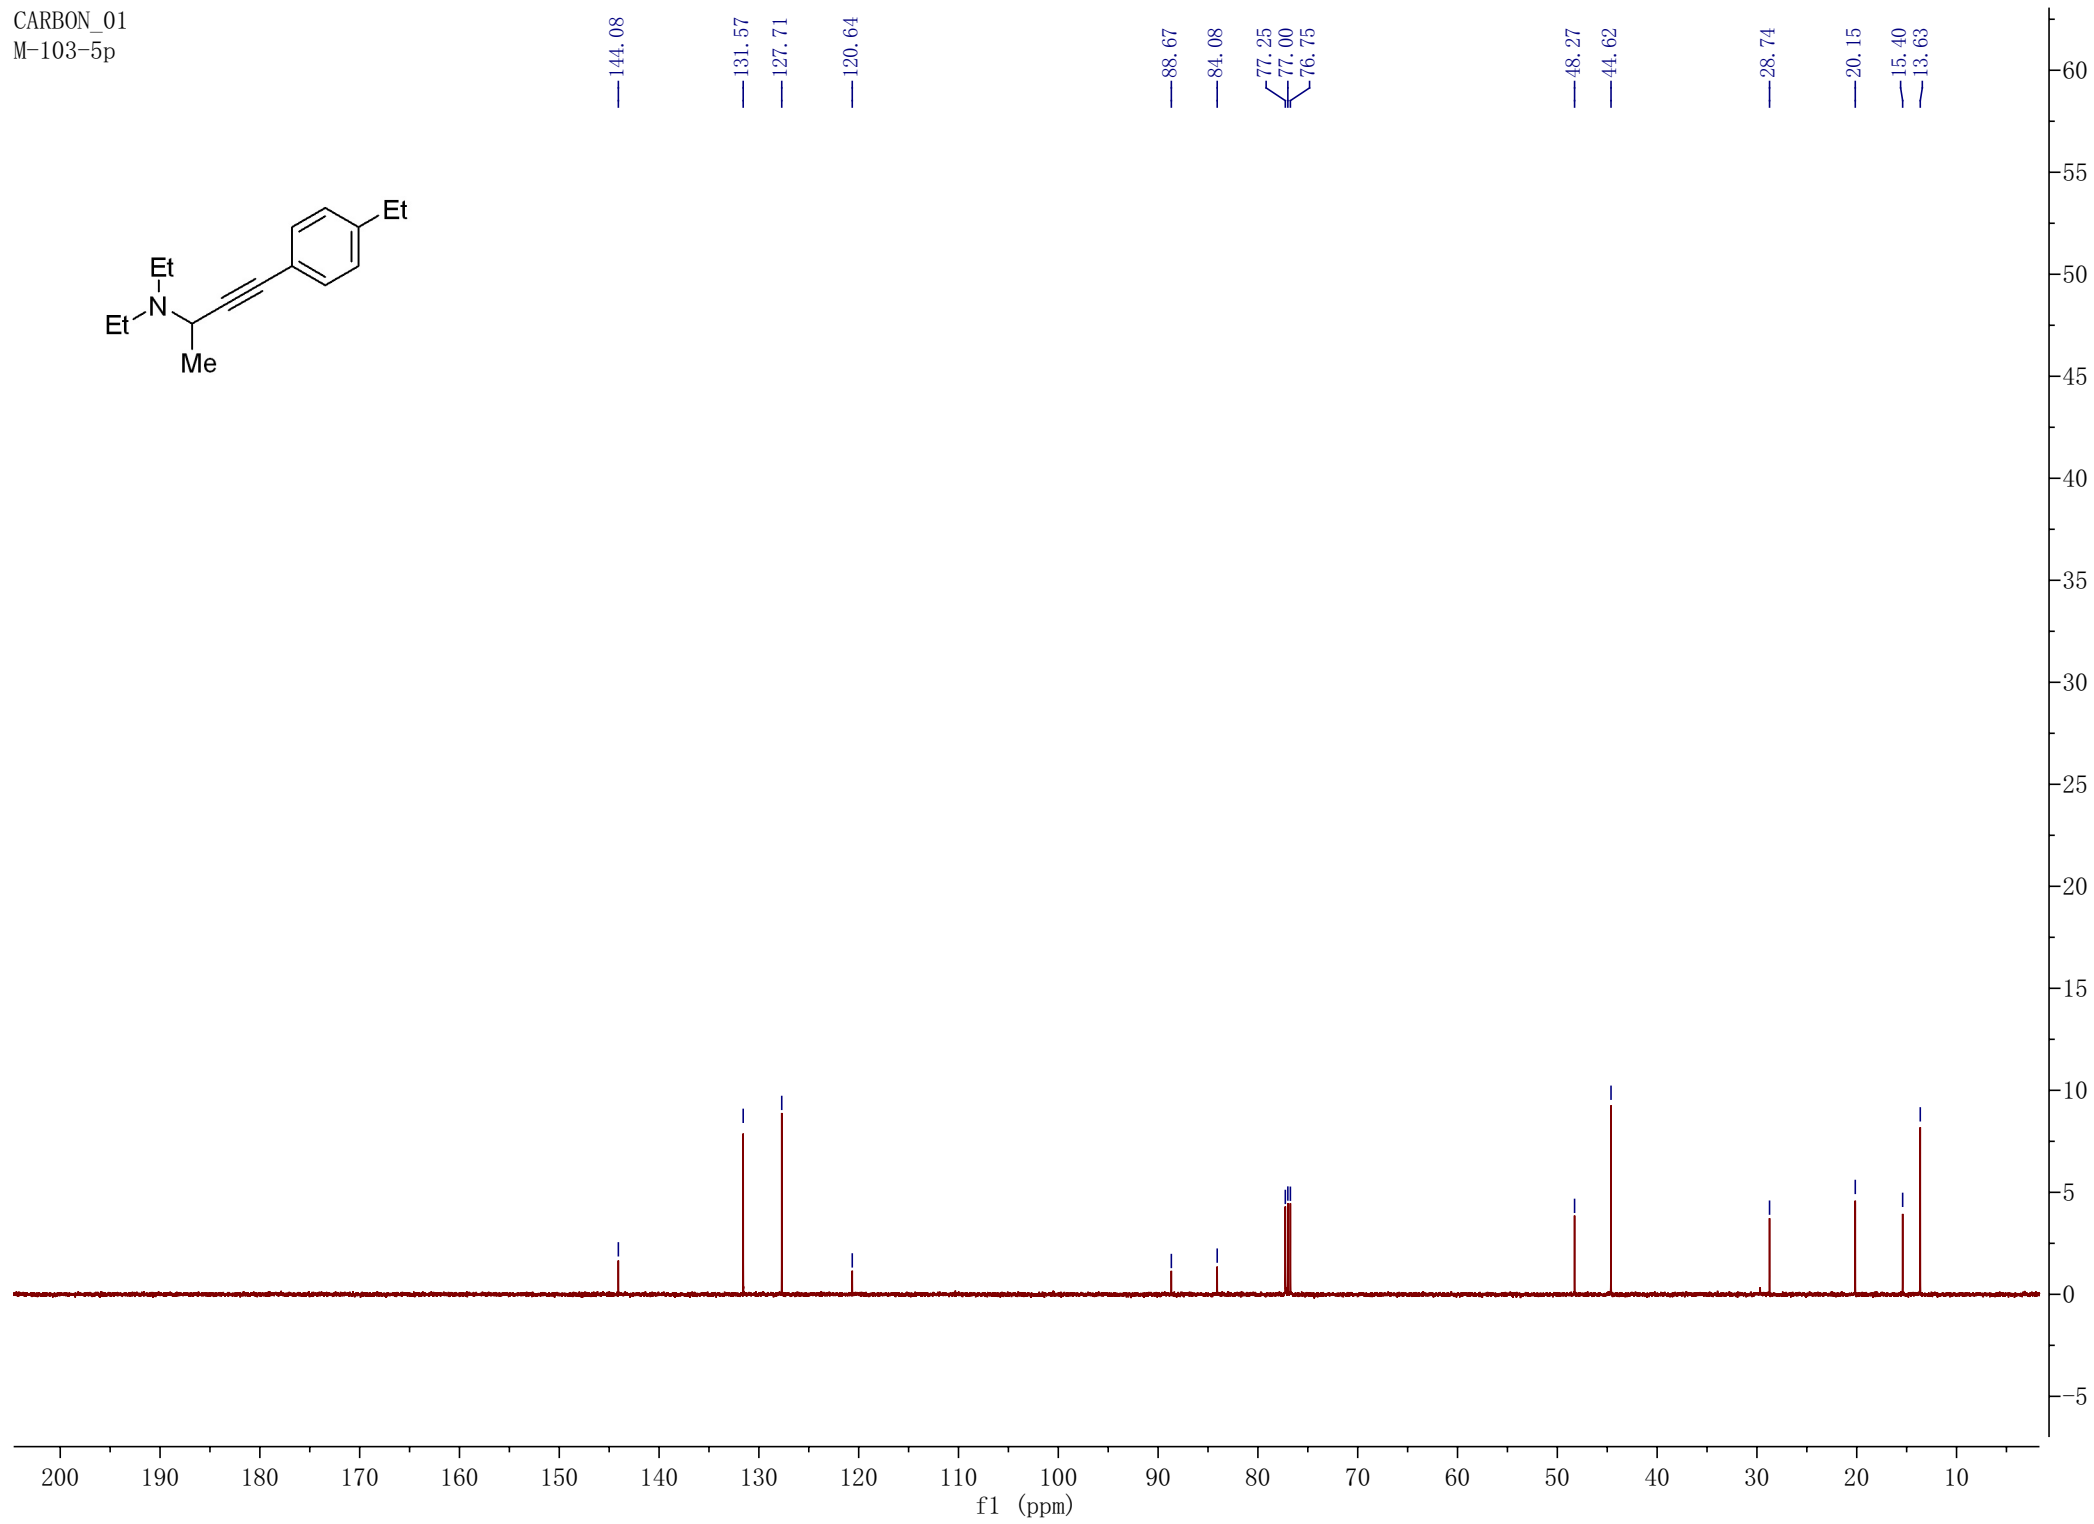

PROTON\_01  
M-103-6p

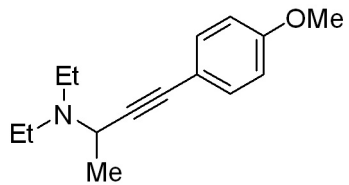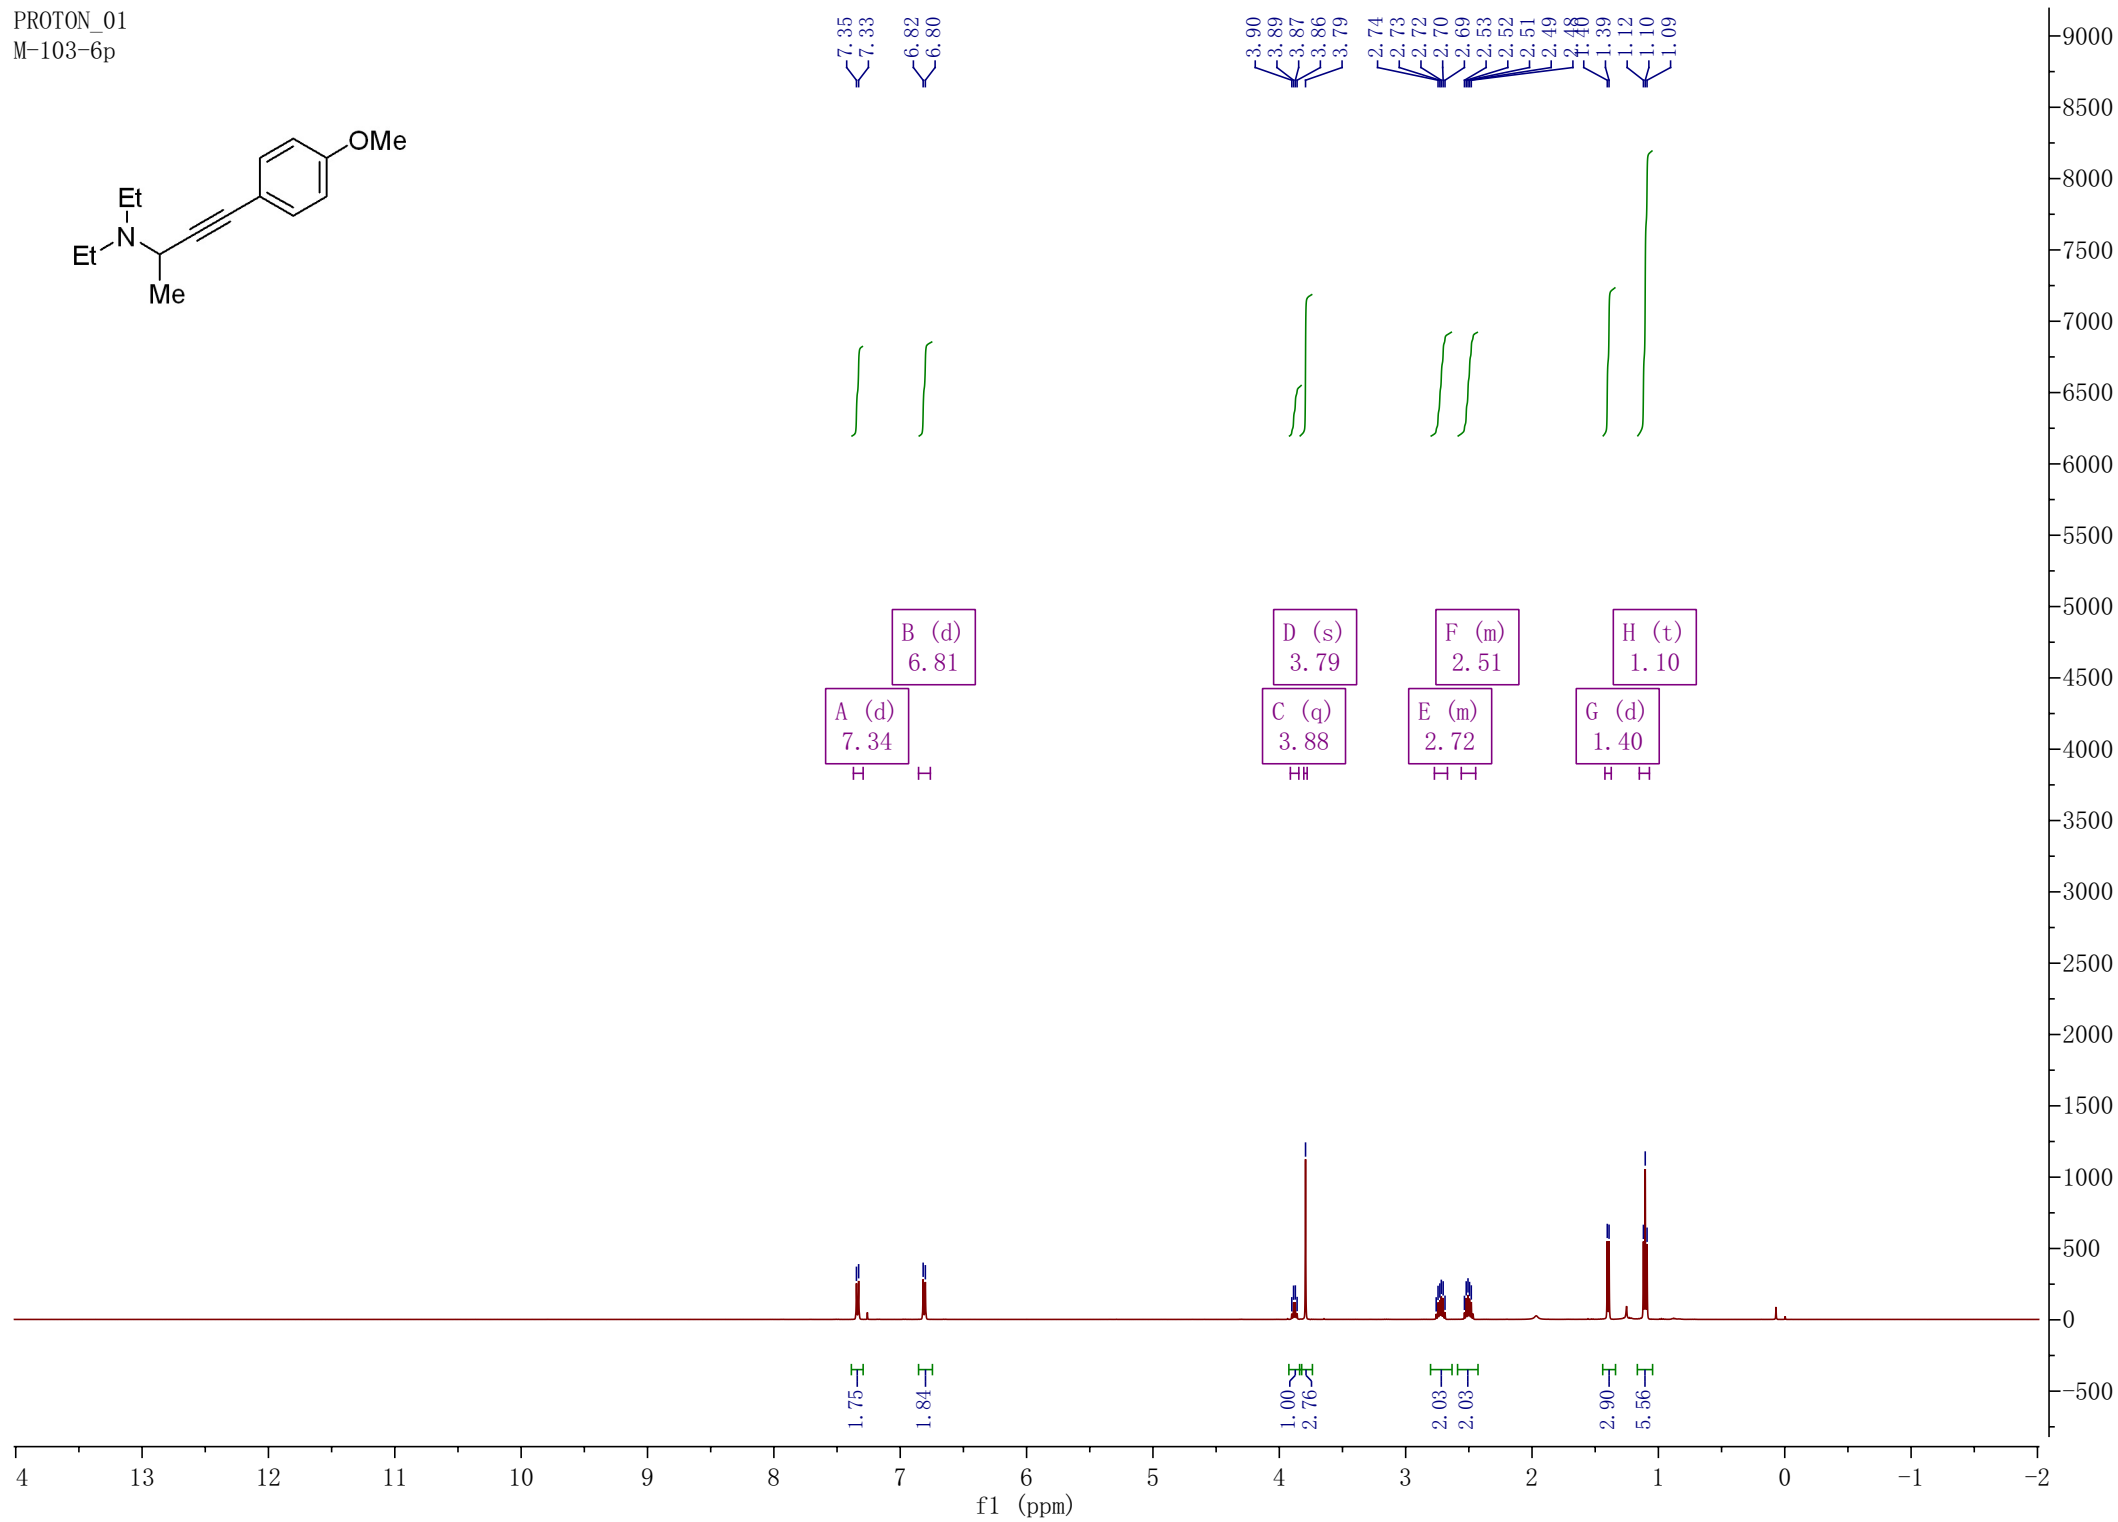



CARBON\_01  
M-103-6p

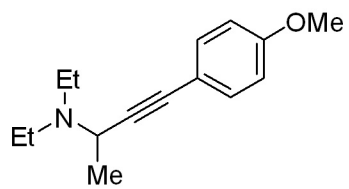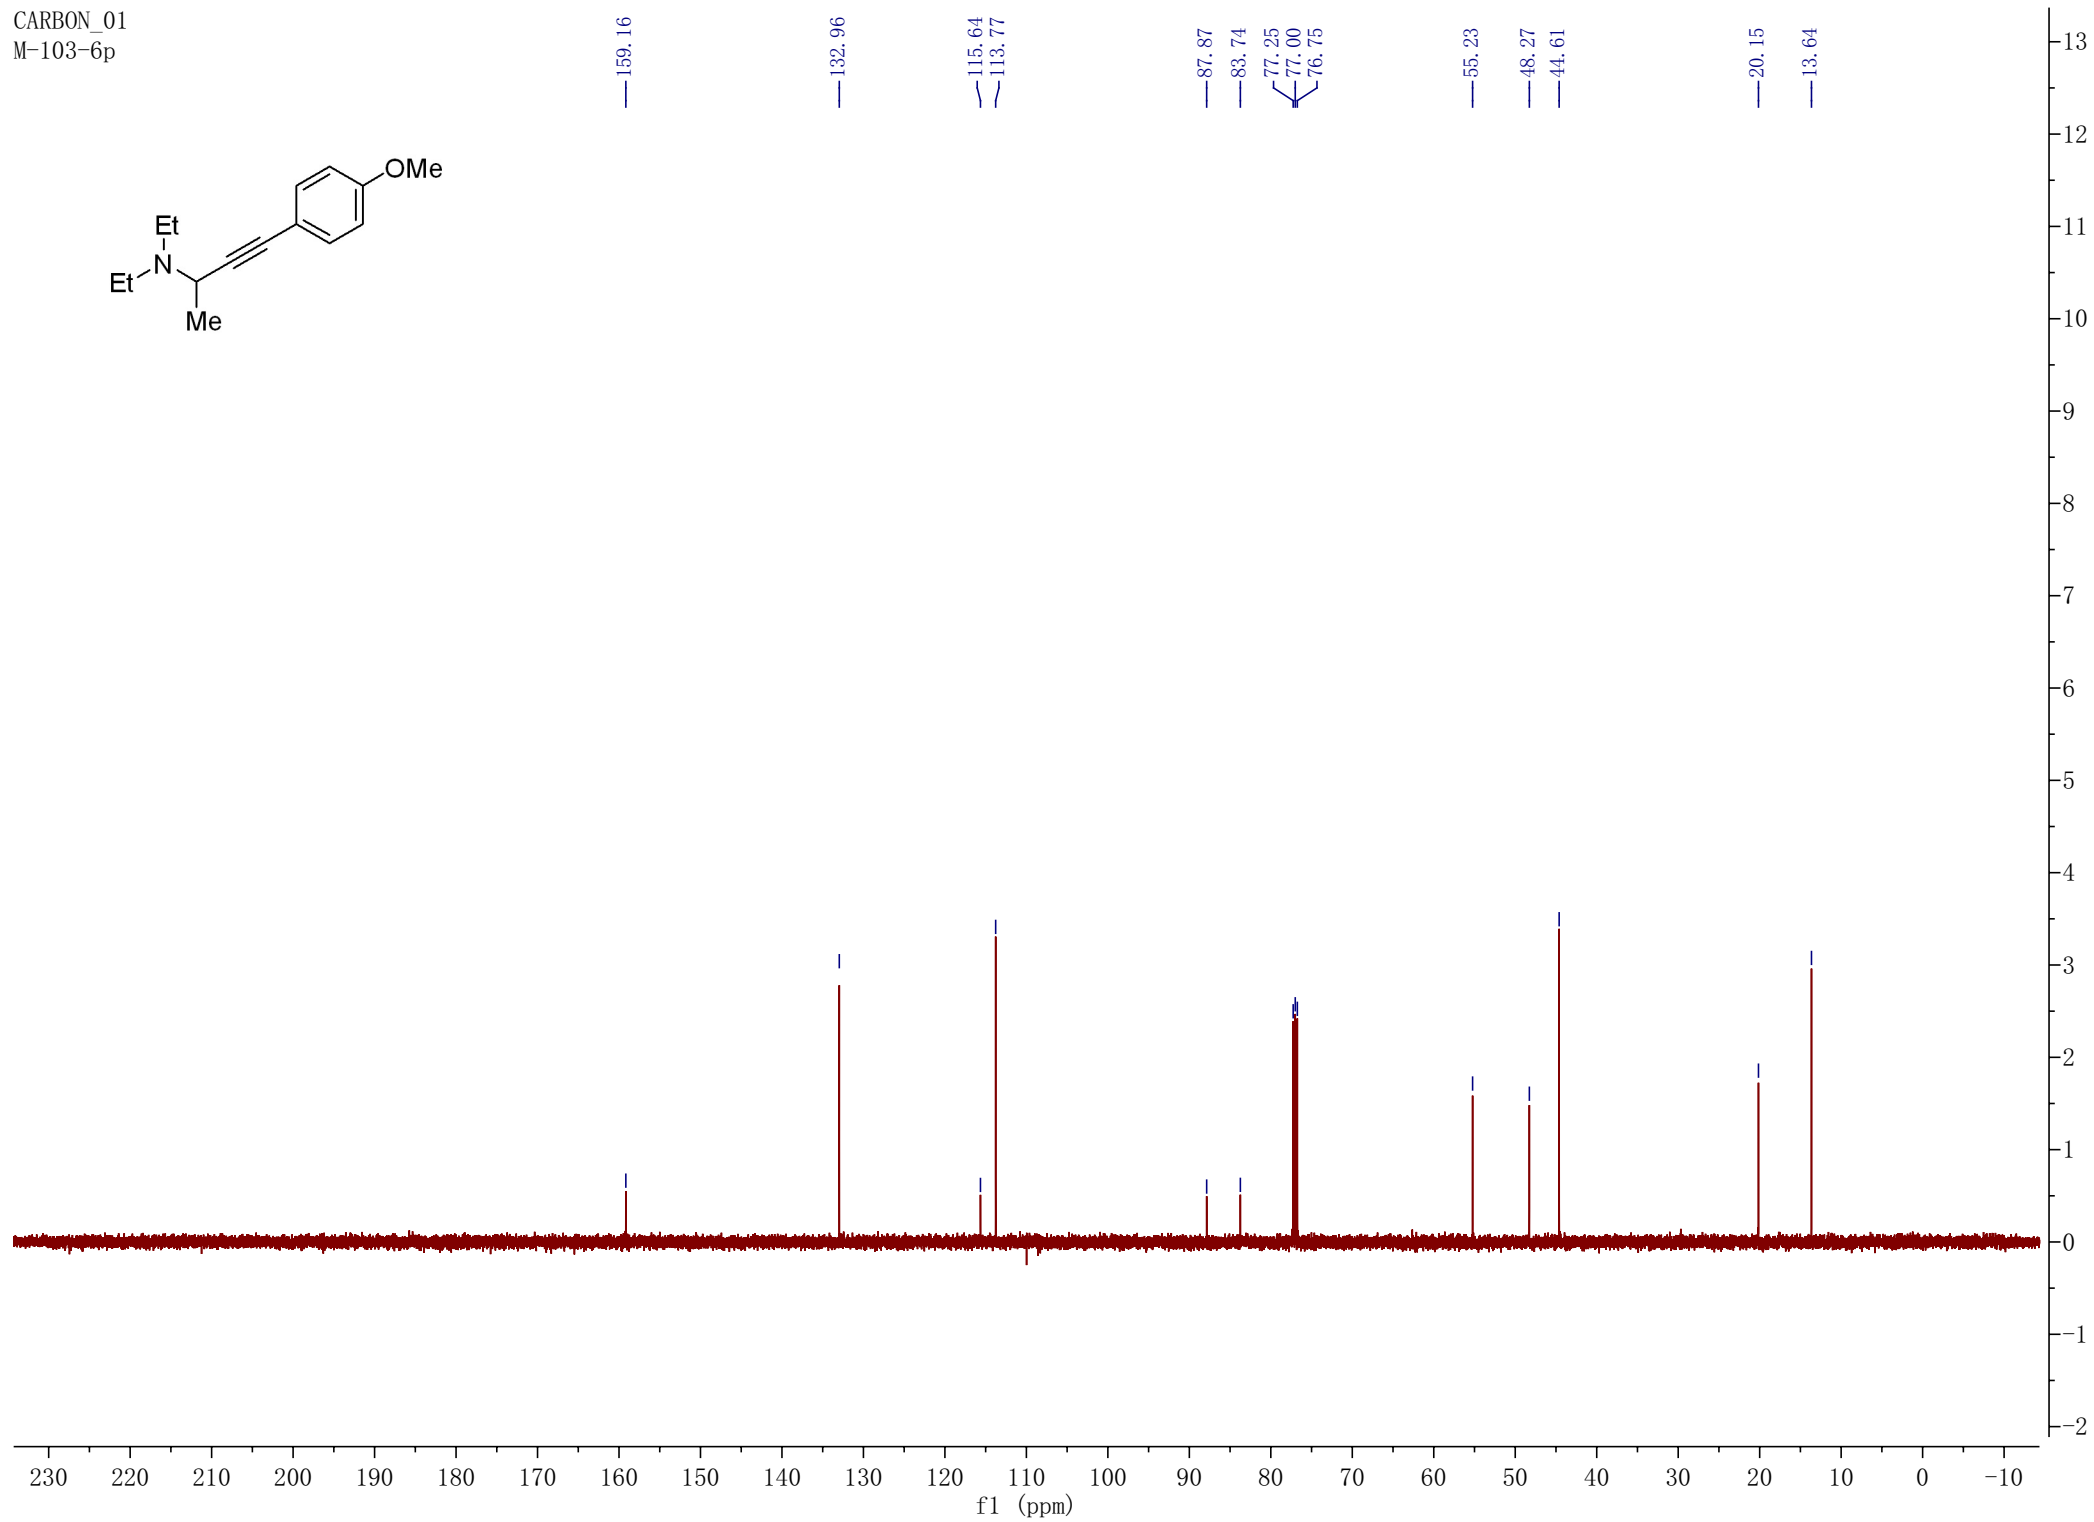

PROTON\_01  
M-103-7p

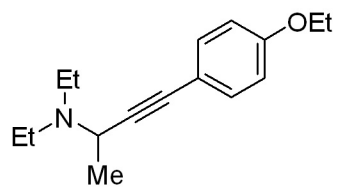

7.33  
7.32

6.81  
6.79

4.03  
4.02  
4.01  
3.99  
3.90  
3.88  
3.87  
3.86

2.76  
2.74  
2.73  
2.72  
2.70  
2.69  
2.53  
2.52  
2.50  
2.49  
2.48  
2.46

1.41  
1.40  
1.40  
1.39  
1.12  
1.10  
1.09

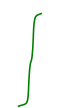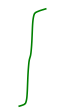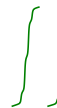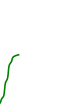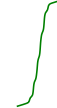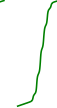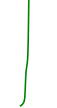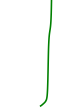

A (d)  
7.32

B (d)  
6.80

C (q)  
4.01

D (q)  
3.88

E (m)  
2.71

F (m)  
2.50

G (t)  
1.40

H (t)  
1.10

1.79

1.89

1.92

1.00

2.05

2.11

5.50

5.51

7.5 7.0 6.5 6.0 5.5 5.0 4.5 4.0 3.5 3.0 2.5 2.0 1.5 1.0 0.5

f1 (ppm)

4500  
4000  
3500  
3000  
2500  
2000  
1500  
1000  
500  
0

CARBON\_01  
M-103-7p

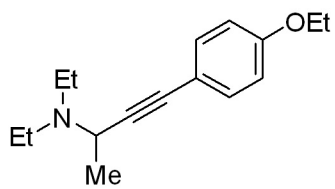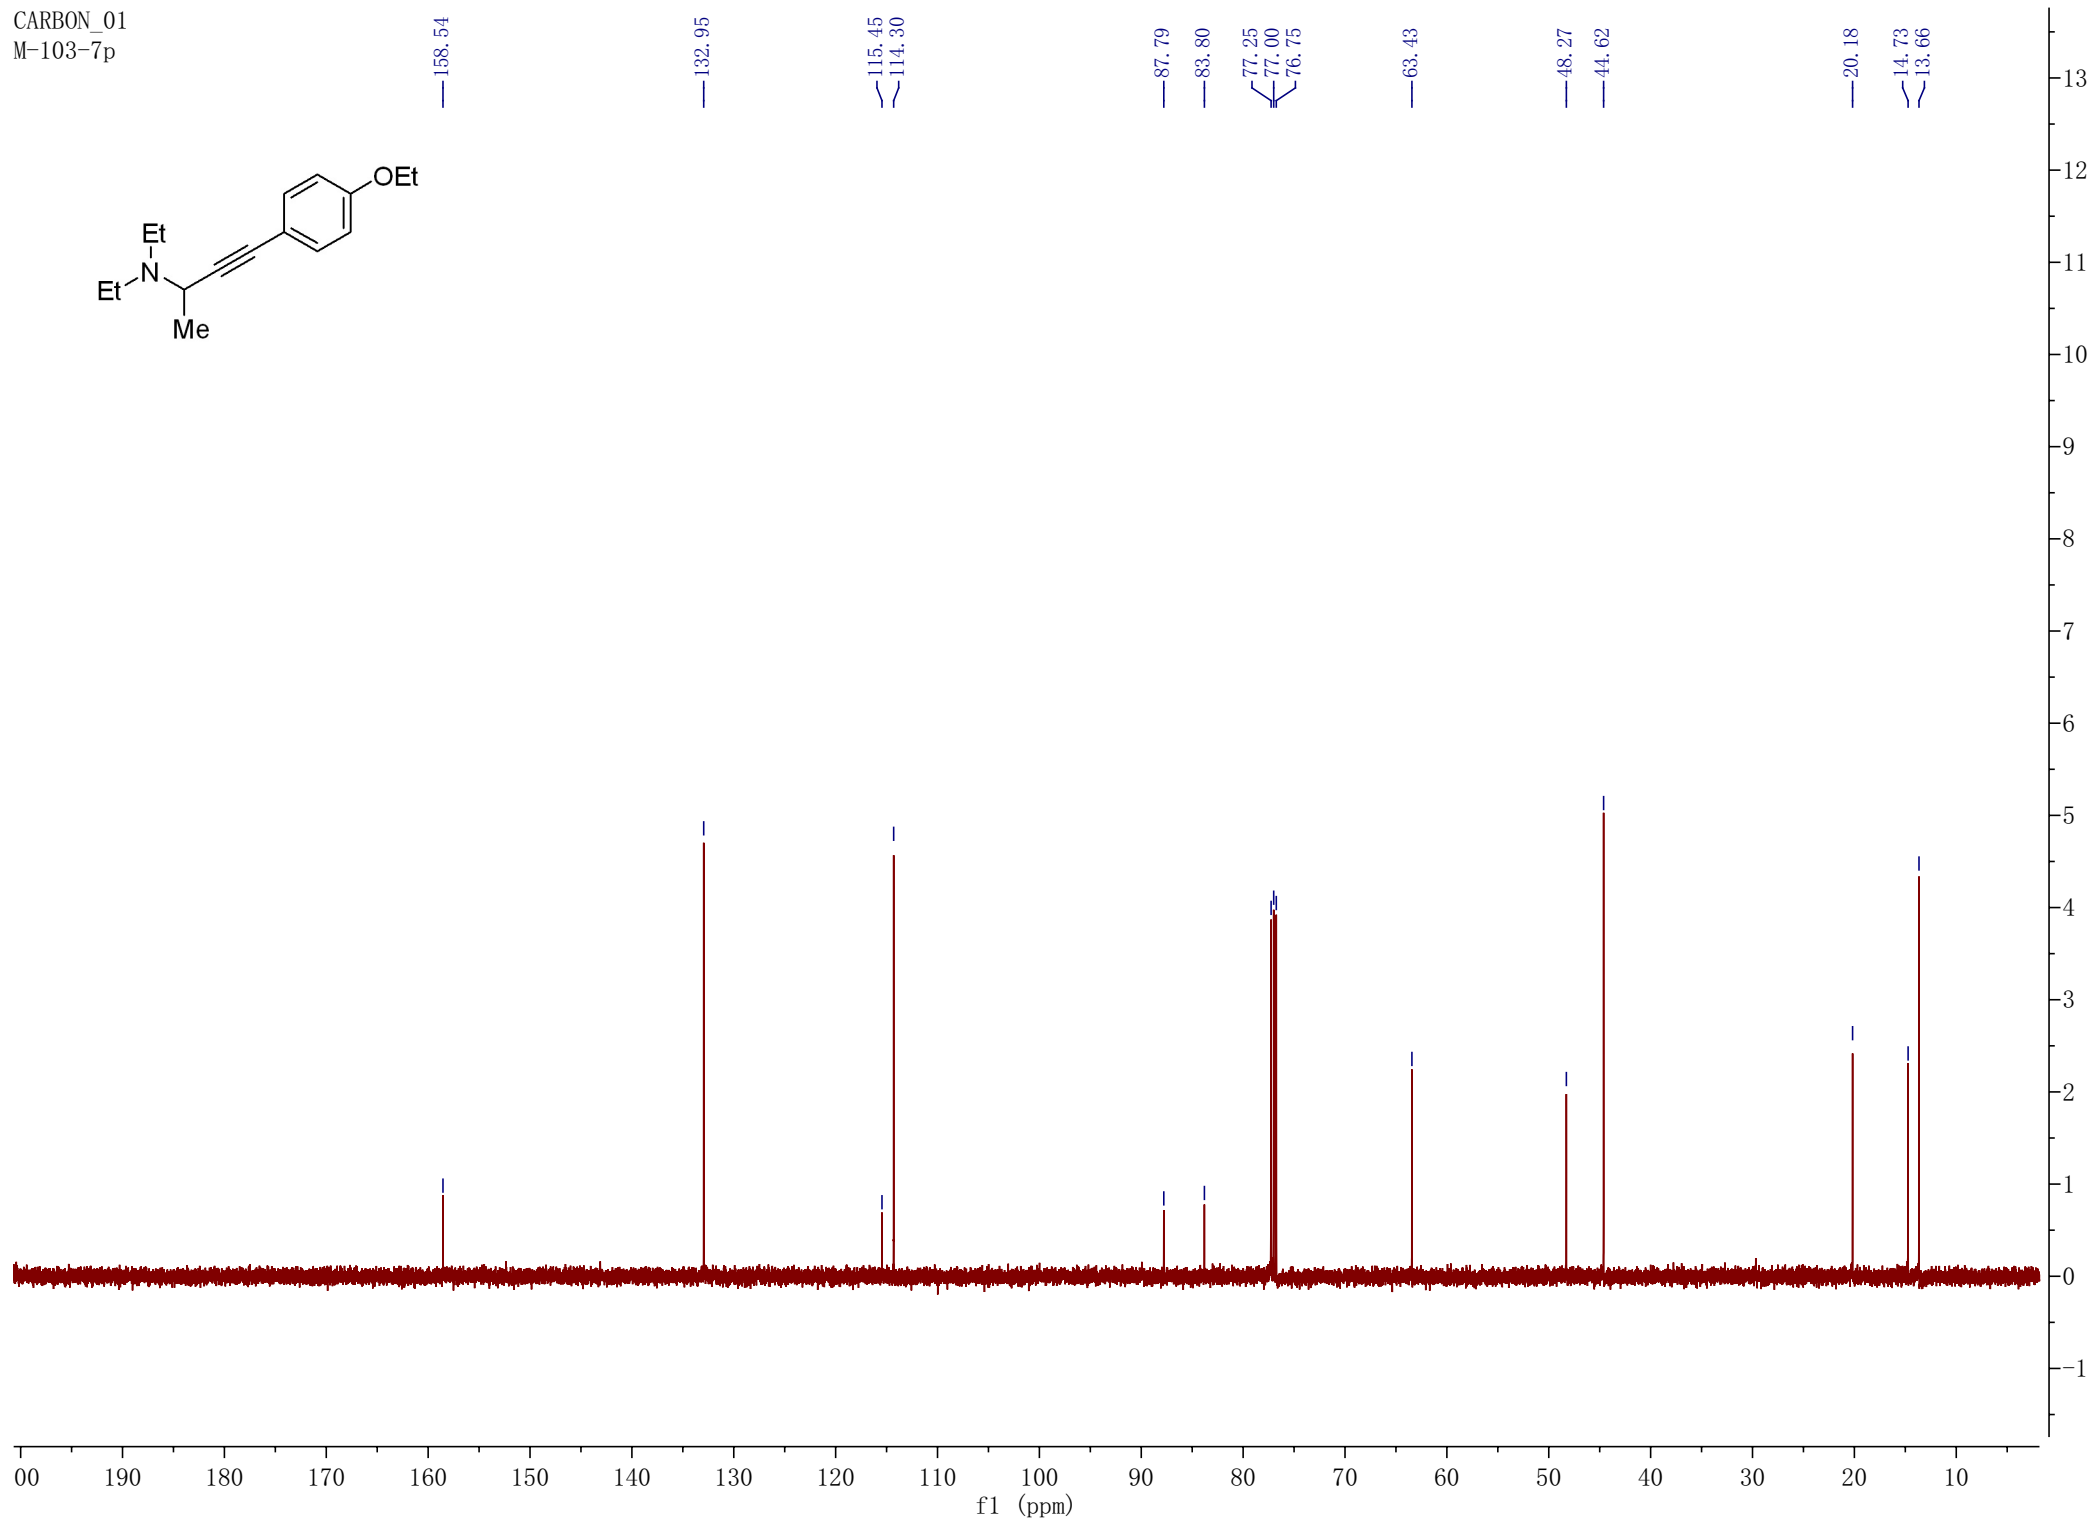

PROTON\_01  
M-103-2p

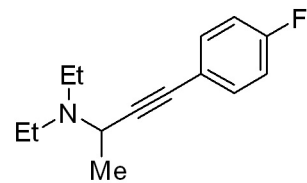

7.39  
7.38  
7.37  
7.36  
7.00  
6.99  
6.97  
6.95

3.90  
3.89  
3.87  
3.86

2.73  
2.72  
2.70  
2.51  
2.50  
2.49  
2.47

1.41  
1.39  
1.12  
1.10  
1.09

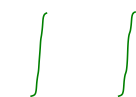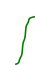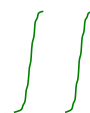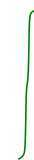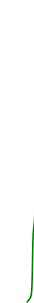

A (m)  
7.37  
B (m)  
6.98

C (q)  
3.88

D (m)  
2.73  
E (m)  
2.50

F (d)  
1.40  
G (t)  
1.10

1.75

1.77

1.00

2.12

2.14

3.12

5.98

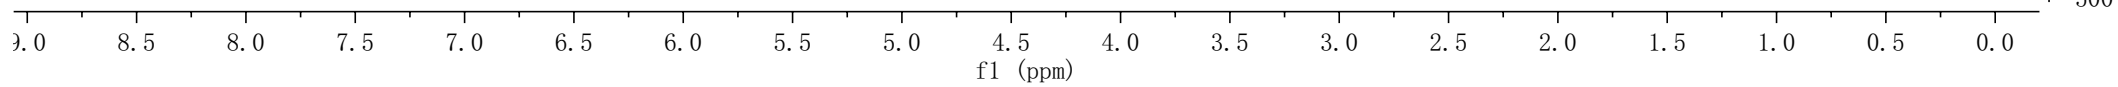

CARBON\_01  
M-103-2p

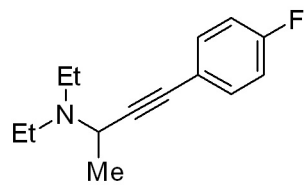

163.14  
161.17

133.45  
133.38

119.56  
115.46  
115.29

89.19

82.92

77.25  
77.00  
76.75

48.22

44.64

20.03

13.65

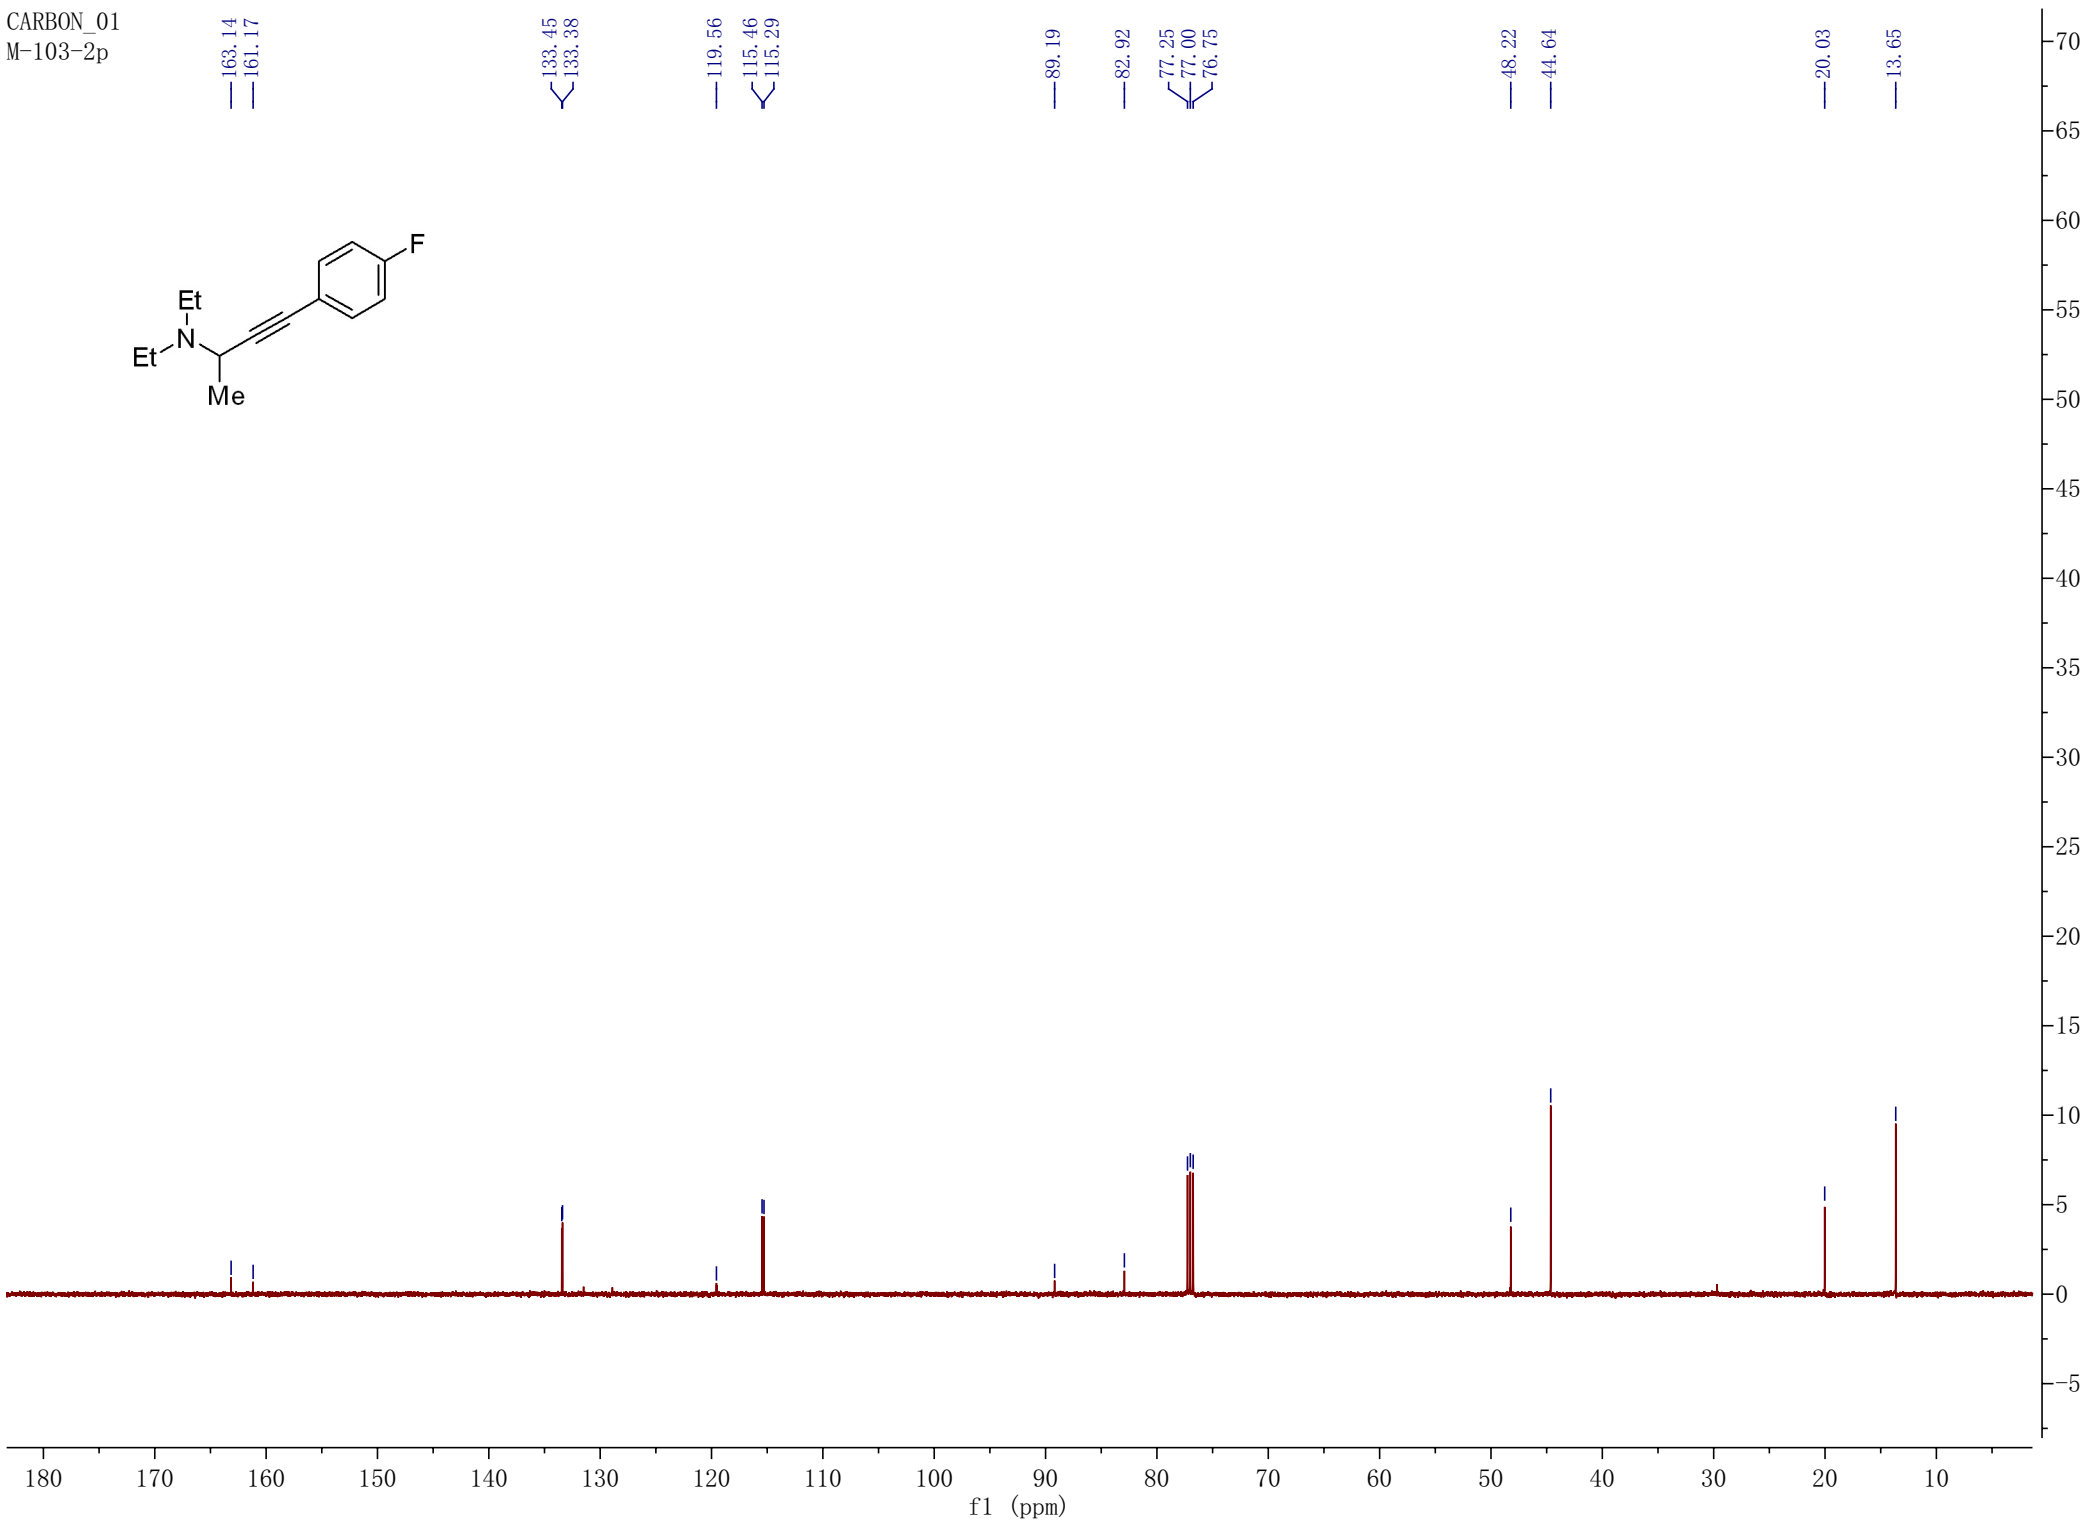

PROTON\_01  
M-103-3p

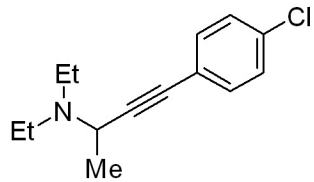

7.33  
7.31  
7.26  
7.24  
7.21

3.90  
3.89  
3.87  
3.86

2.75  
2.74  
2.72  
2.71  
2.70  
2.68  
2.52  
2.51  
2.49  
2.48  
2.47  
2.45

1.40  
1.39  
1.12  
1.10  
1.09

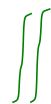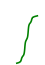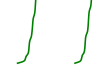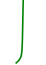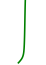

B (d)  
7.25  
A (d)  
7.32

C (q)  
3.88

E (m)  
2.49  
D (m)  
2.72

G (t)  
1.10  
F (d)  
1.40

1.86  
1.96

1.00

2.13  
2.16

3.18

5.98

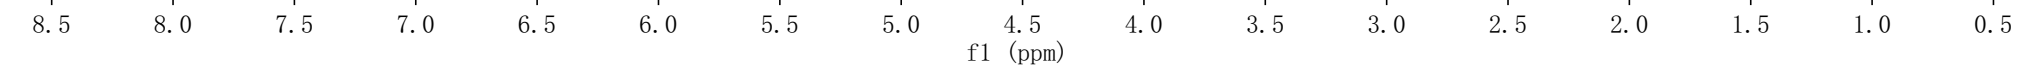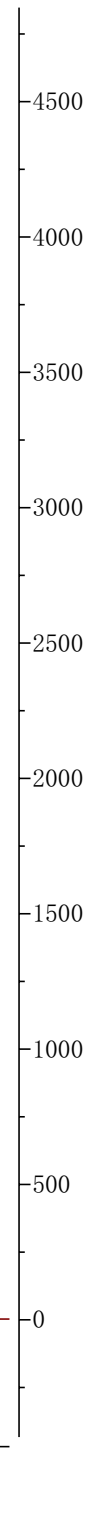

CARBON\_01  
M-103-3p

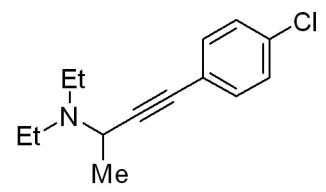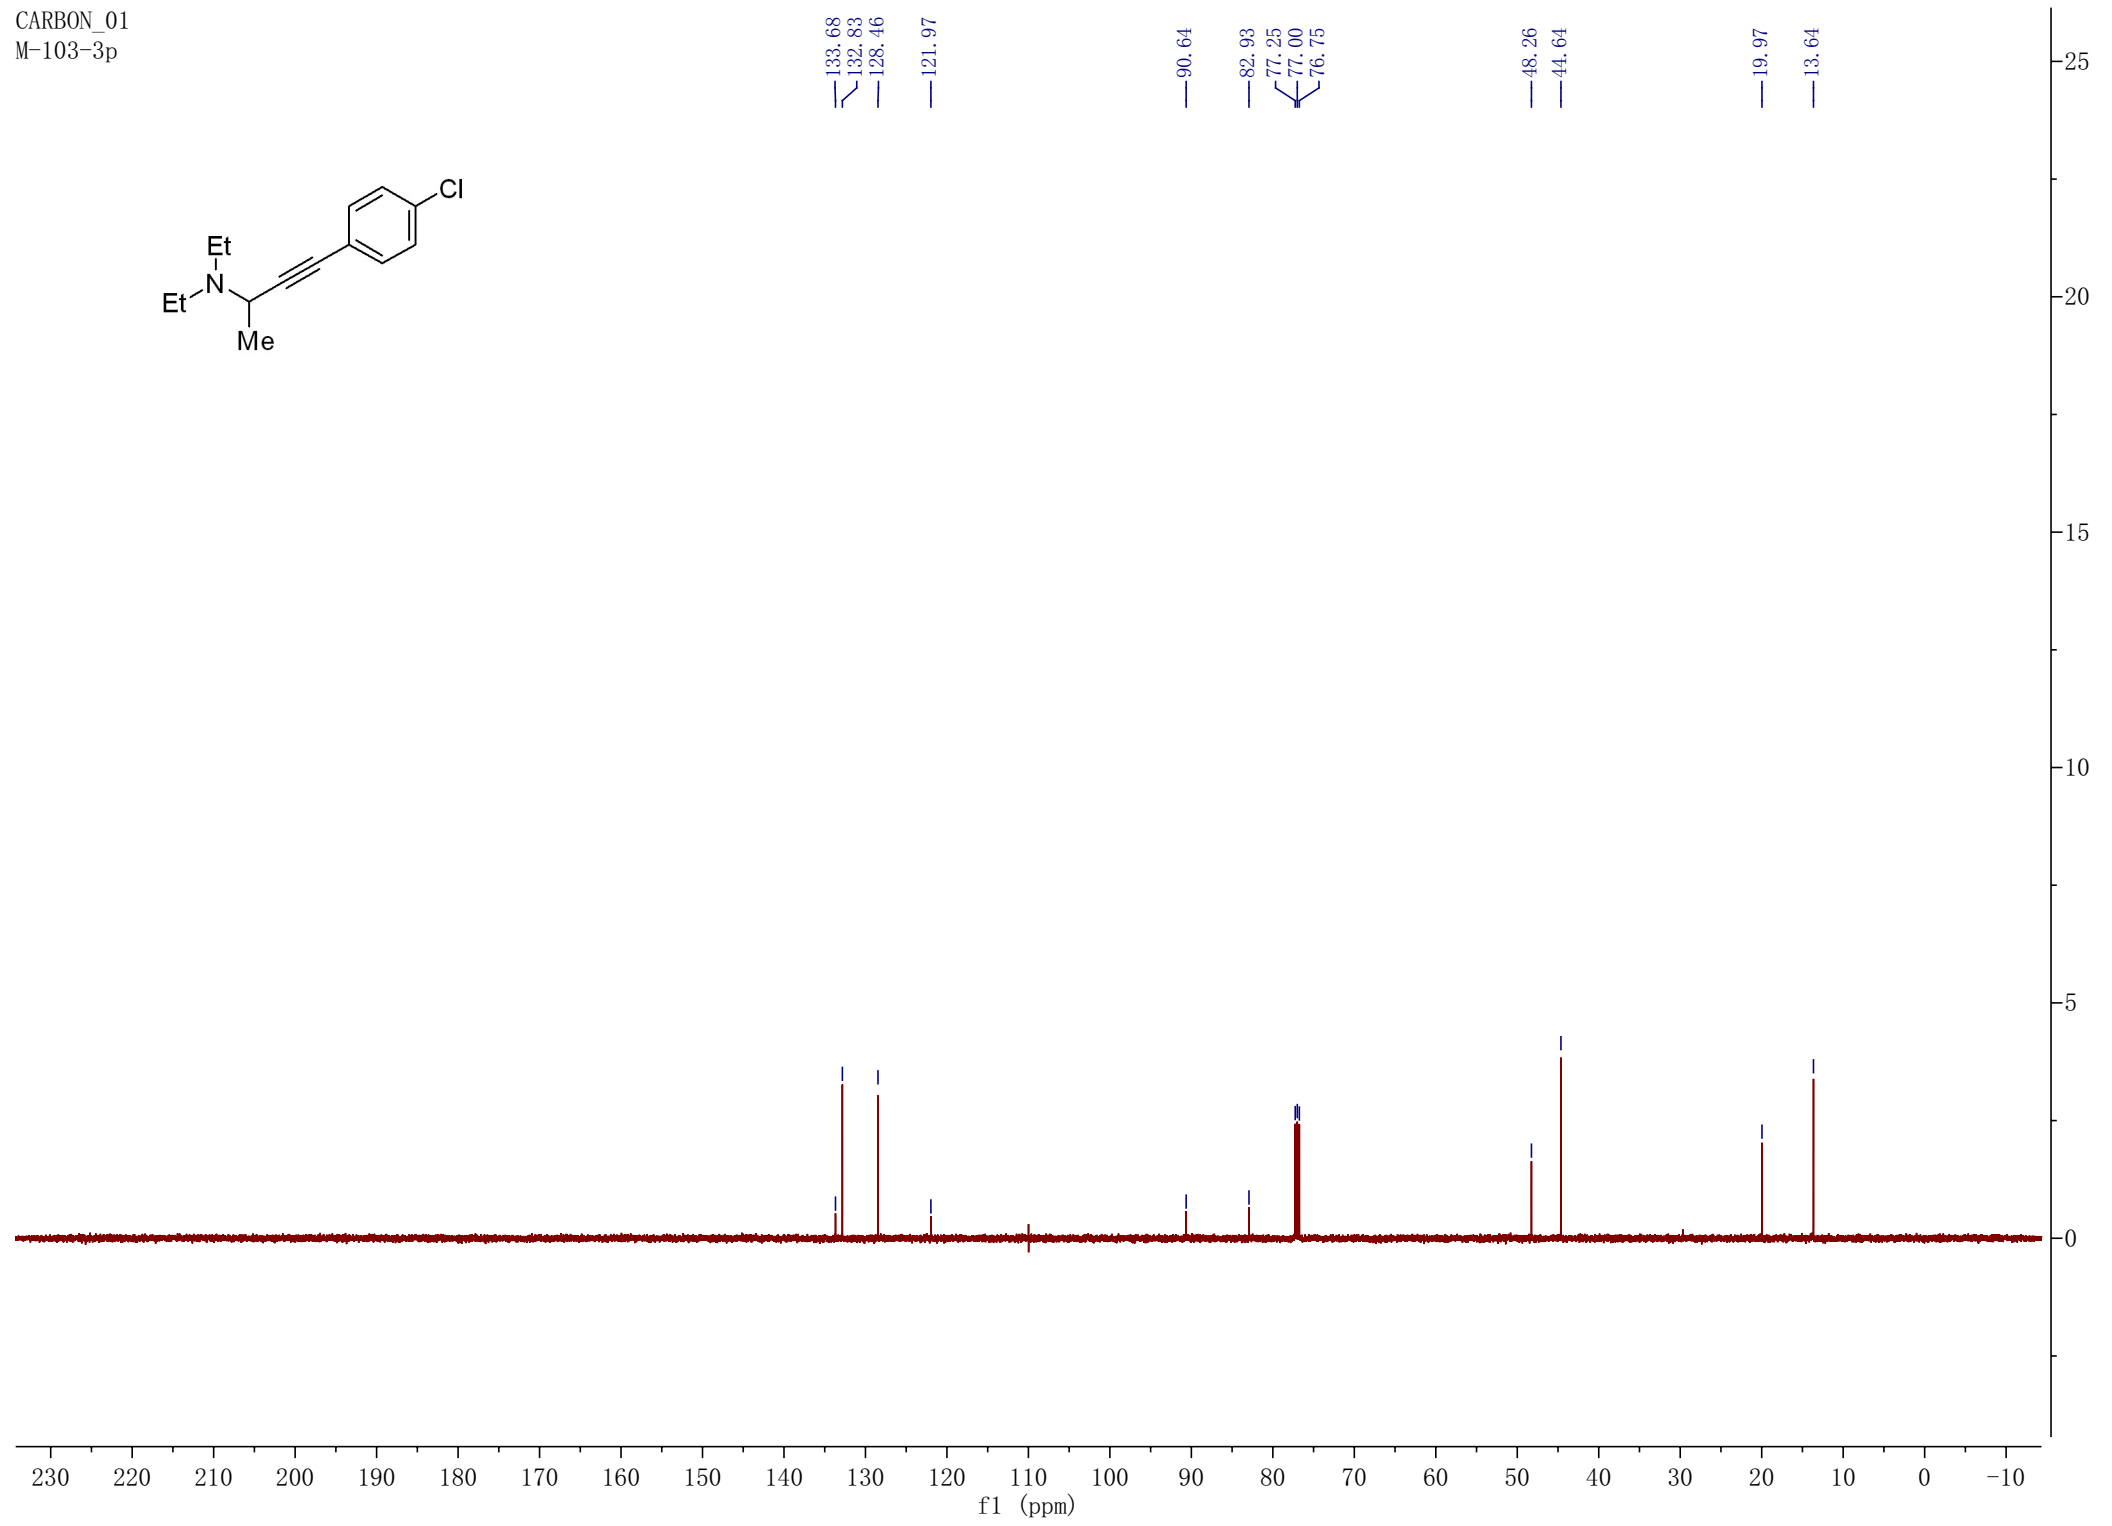

PROTON\_01  
M-103-4p

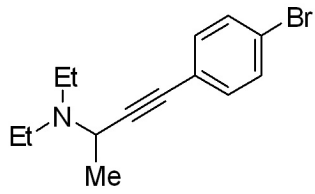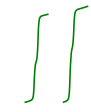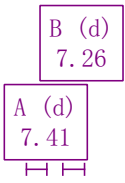

3.90  
3.88  
3.87  
3.85

2.75  
2.74  
2.72  
2.71  
2.70  
2.68  
2.52  
2.51  
2.49  
2.48  
2.47  
2.45

1.40  
1.39  
1.12  
1.10  
1.09

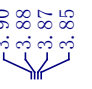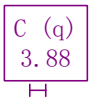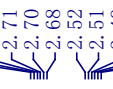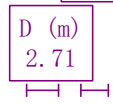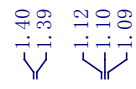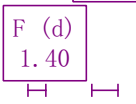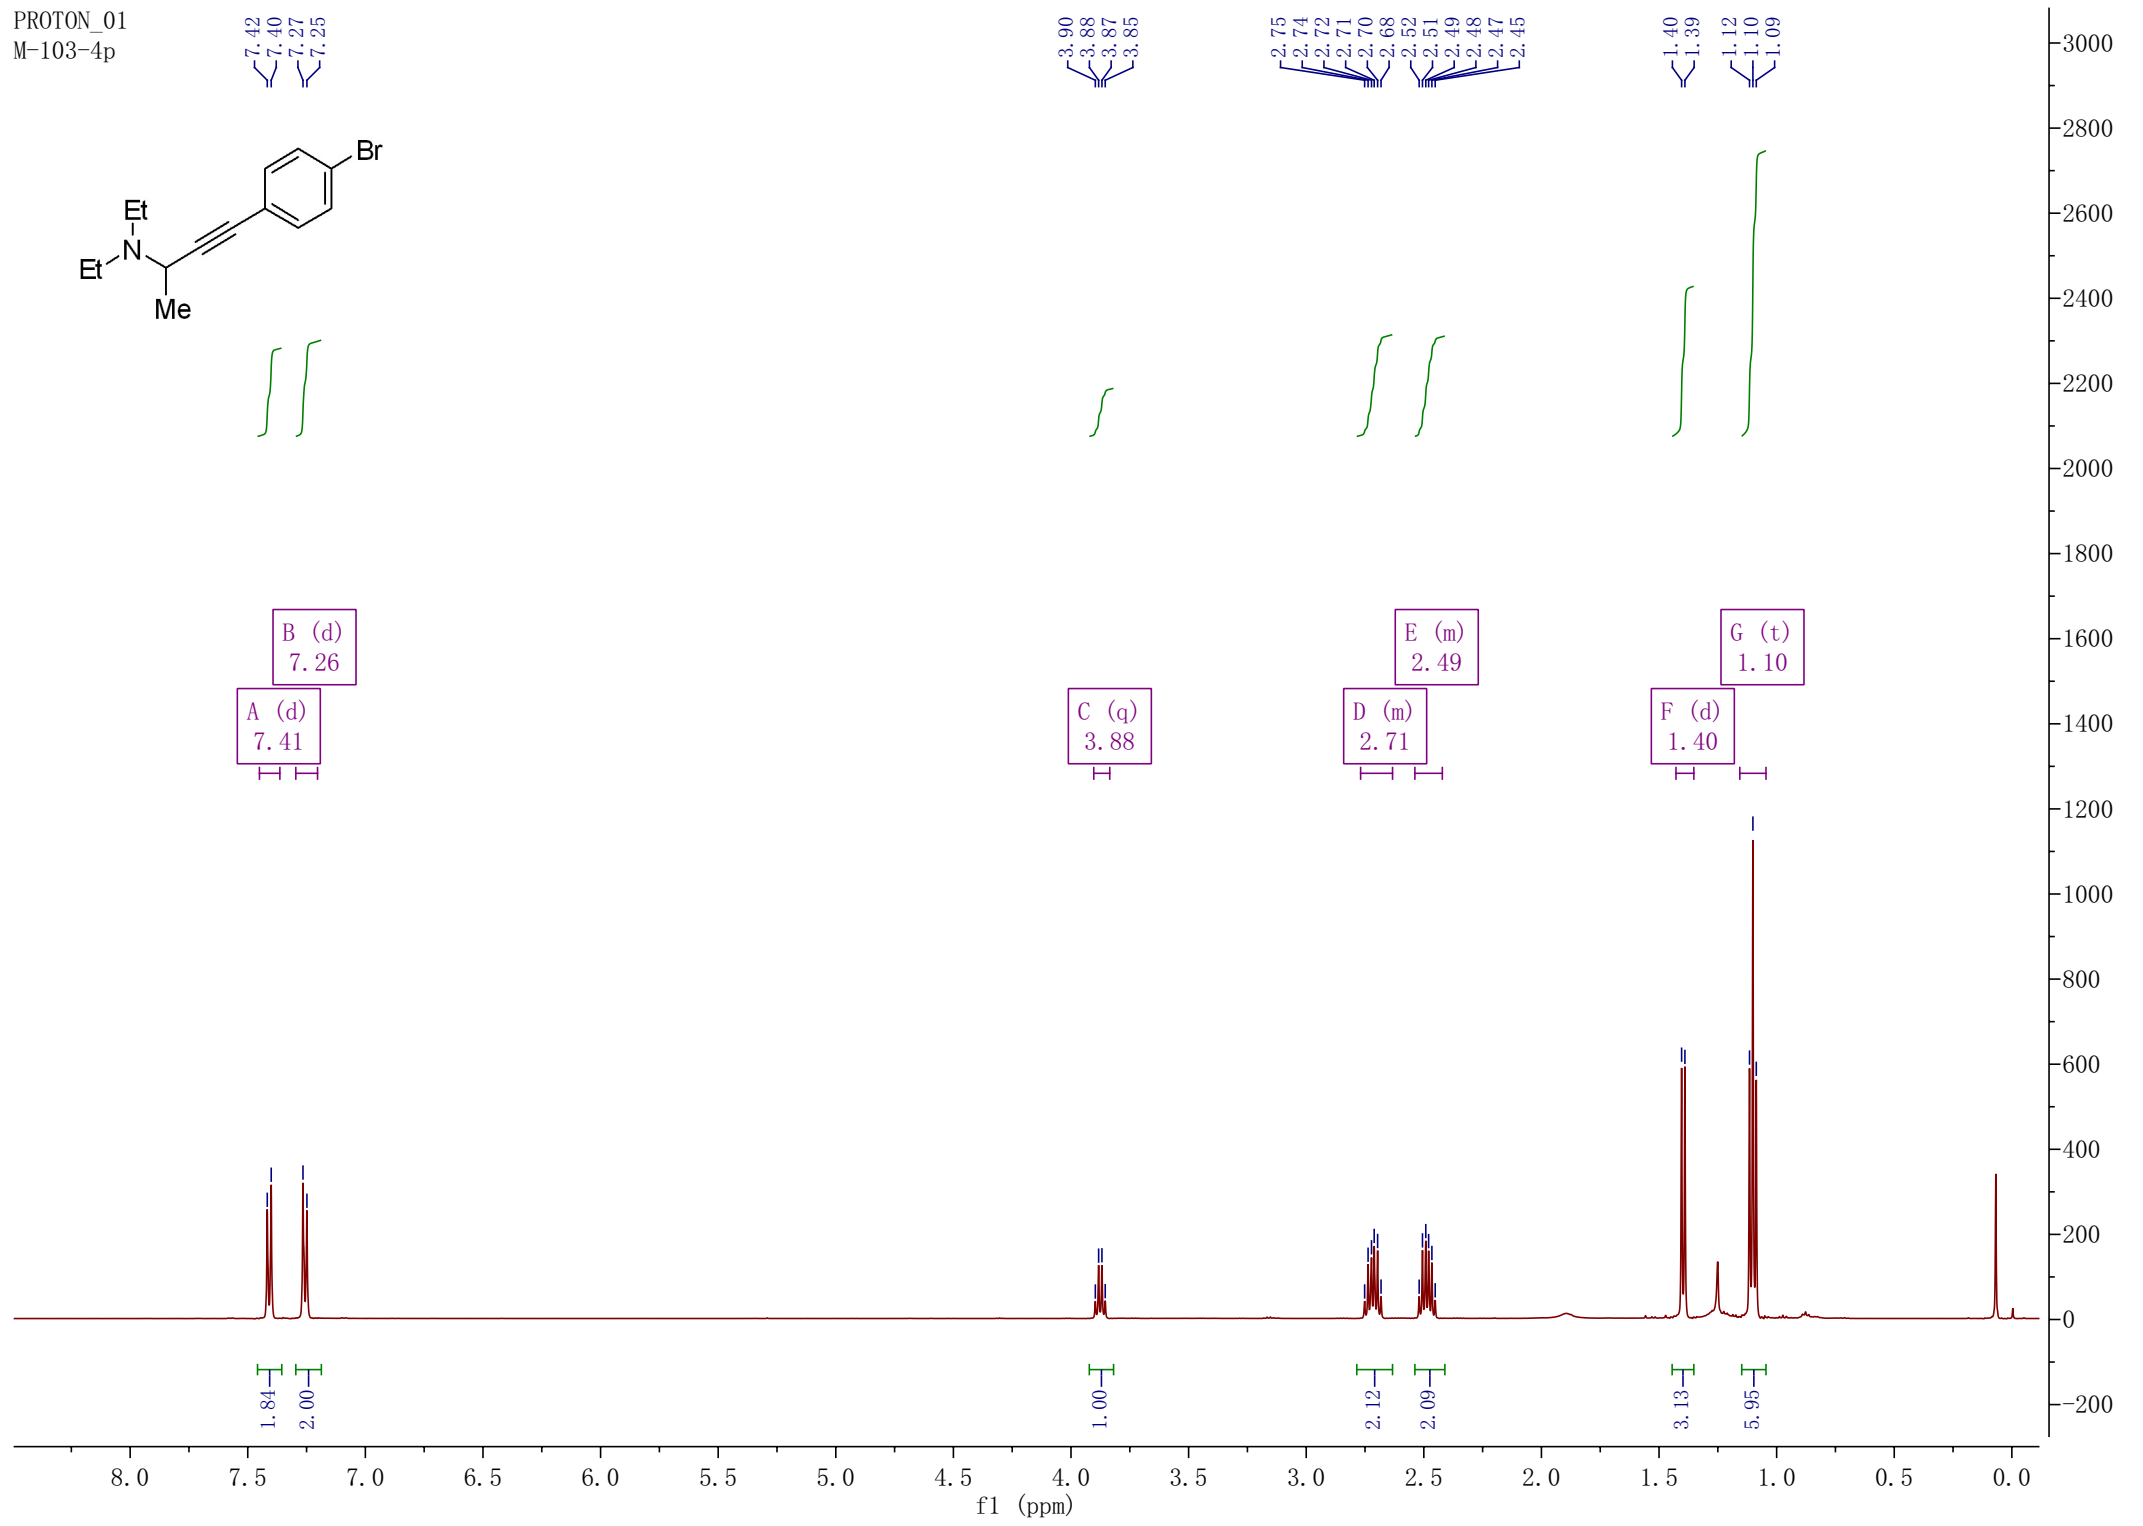



CARBON\_01  
M-103-4p

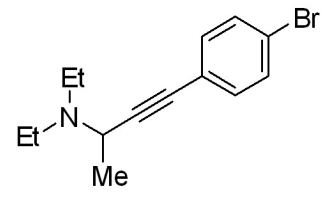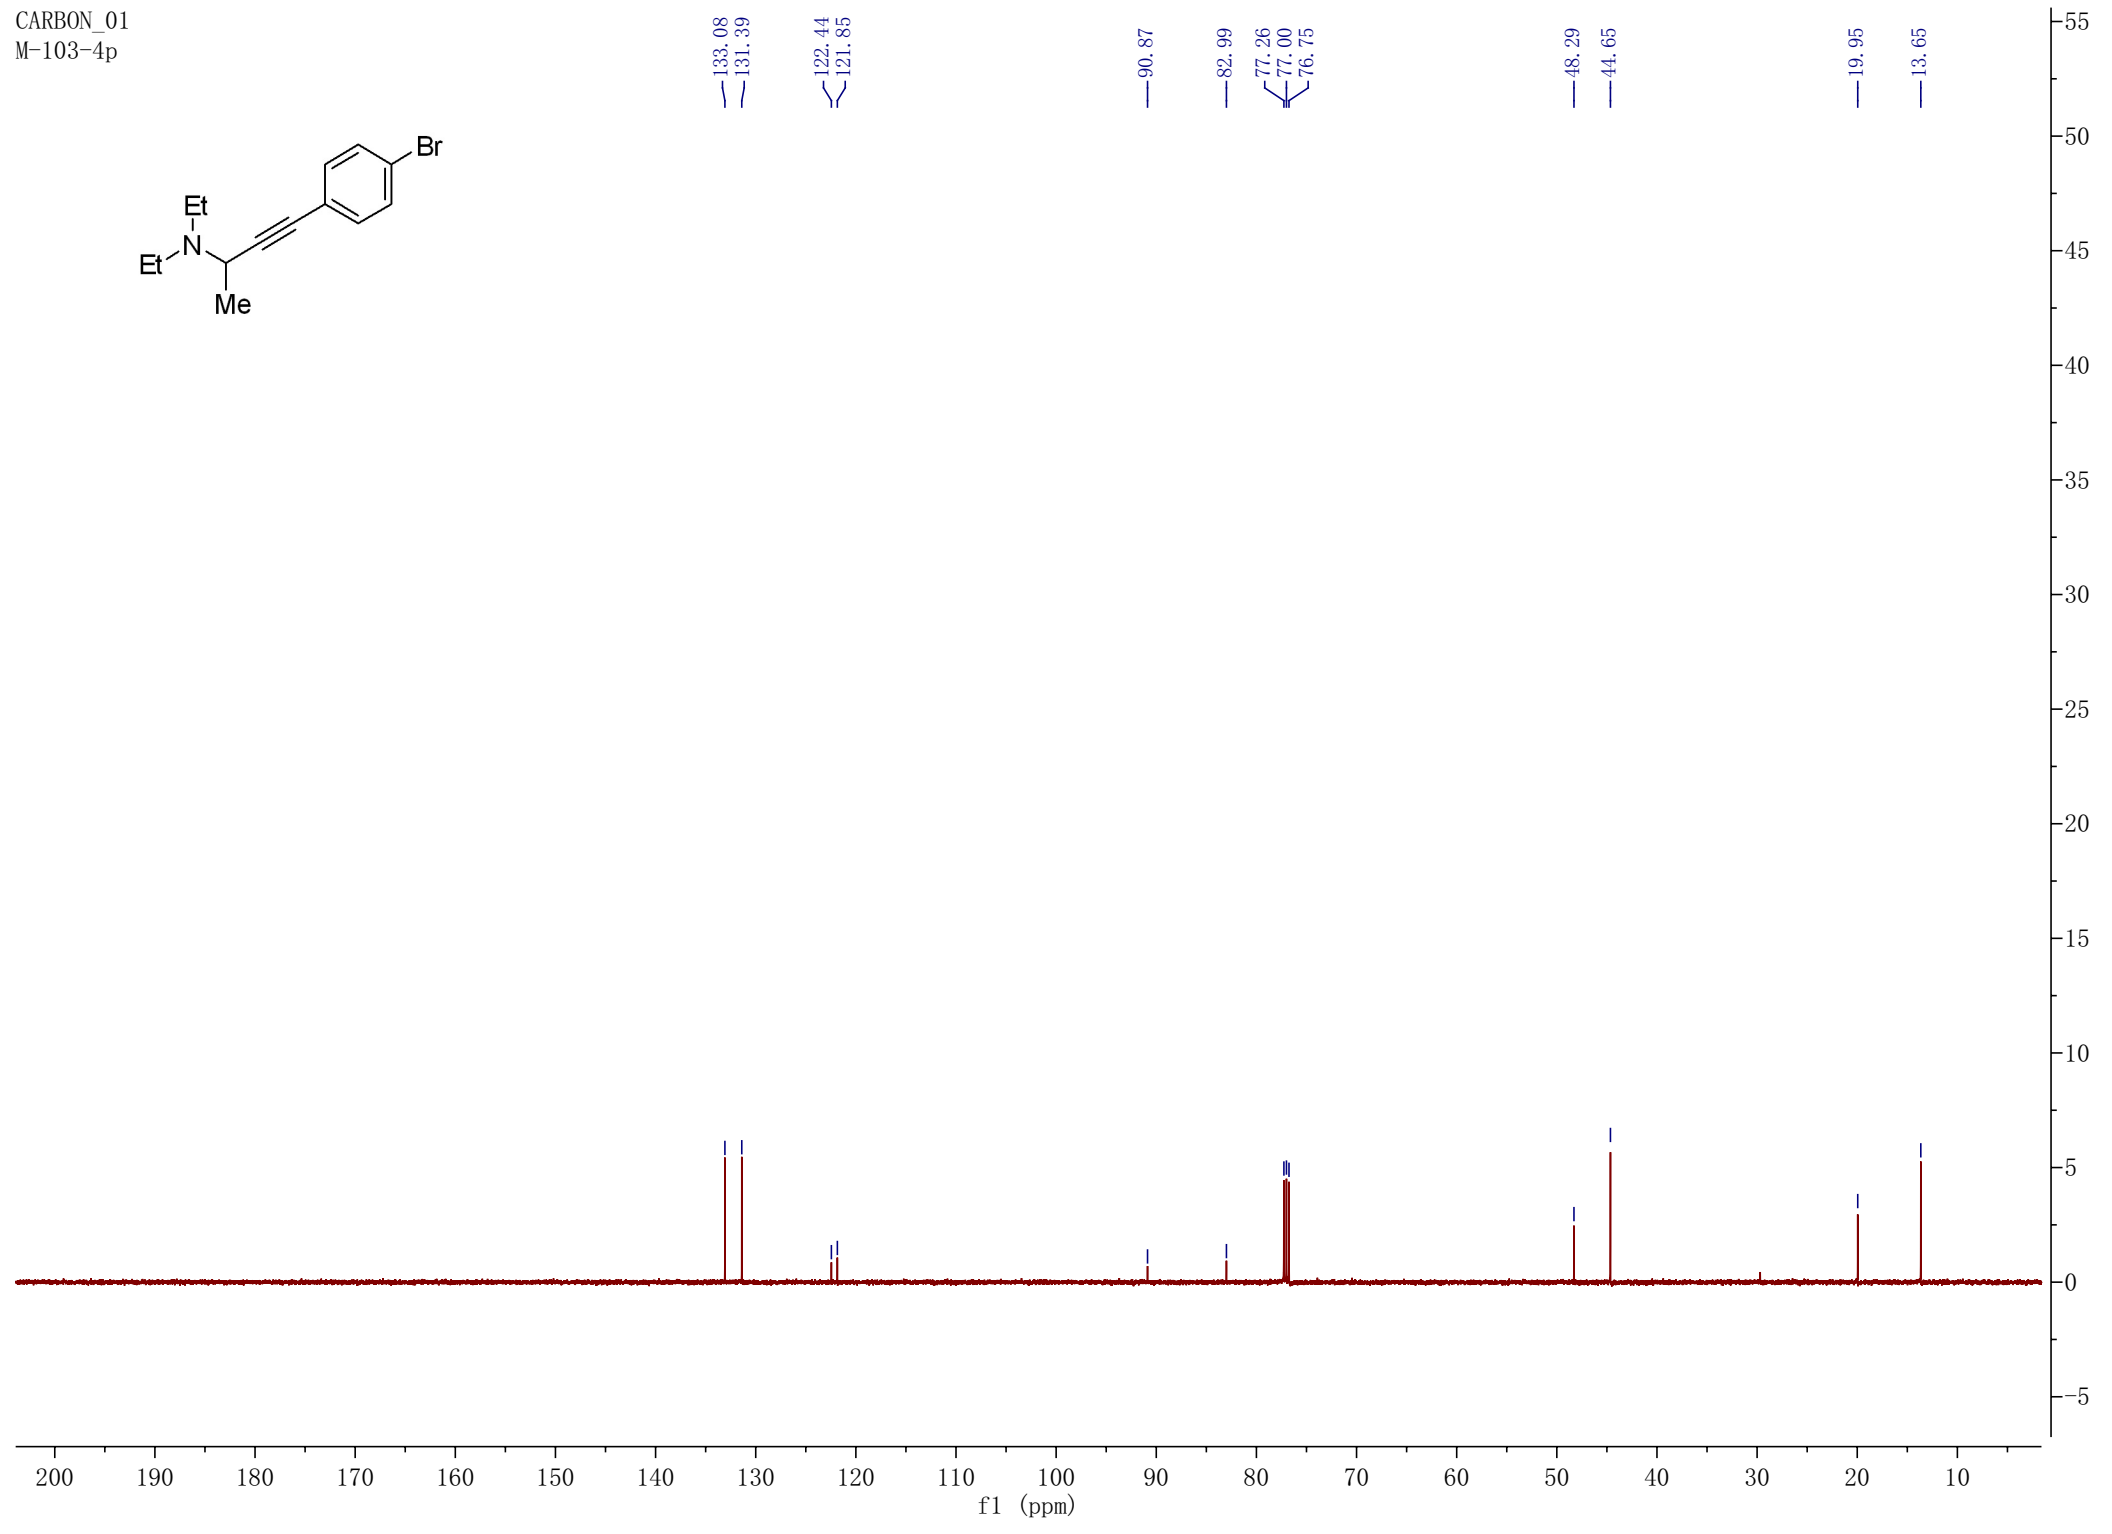

PROTON\_01  
M-103-13P

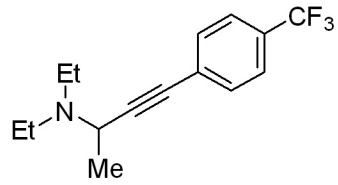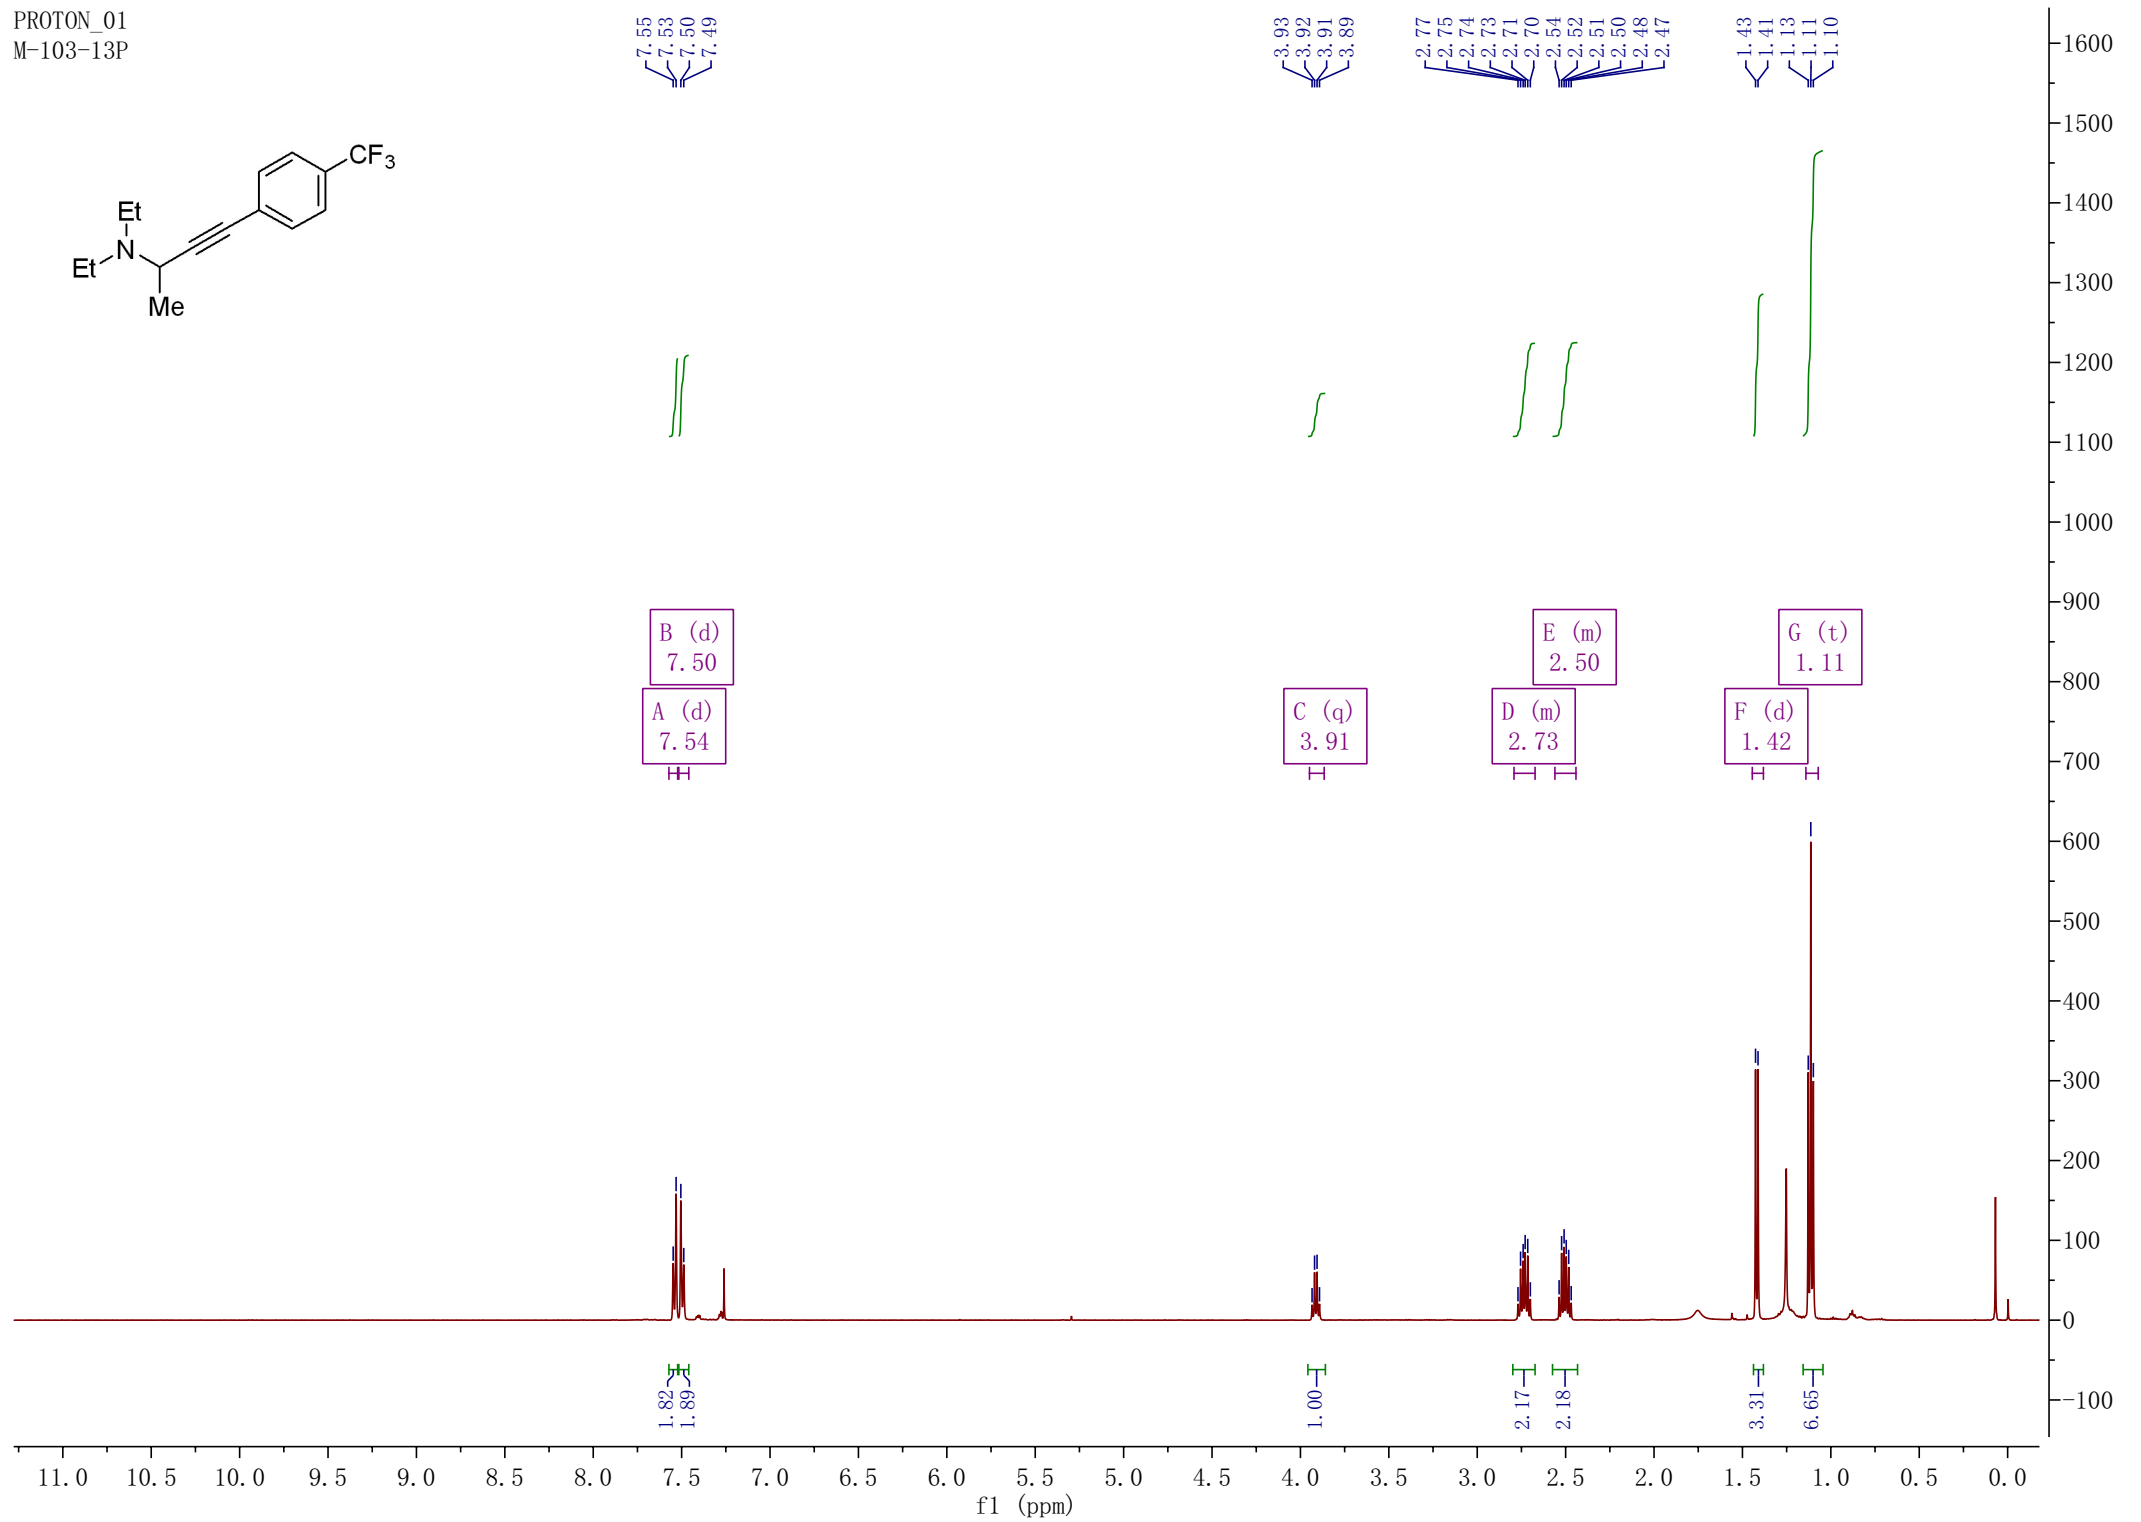

CARBON\_01  
M-103-13P

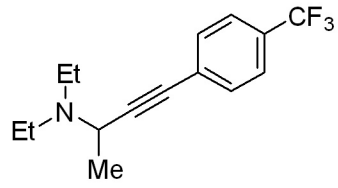

131.86  
131.63  
129.66  
129.40  
128.18  
127.76  
127.34  
125.15  
125.12  
125.09  
125.06

92.43

82.88

77.25

77.00

76.75

48.31

44.68

19.90

13.65

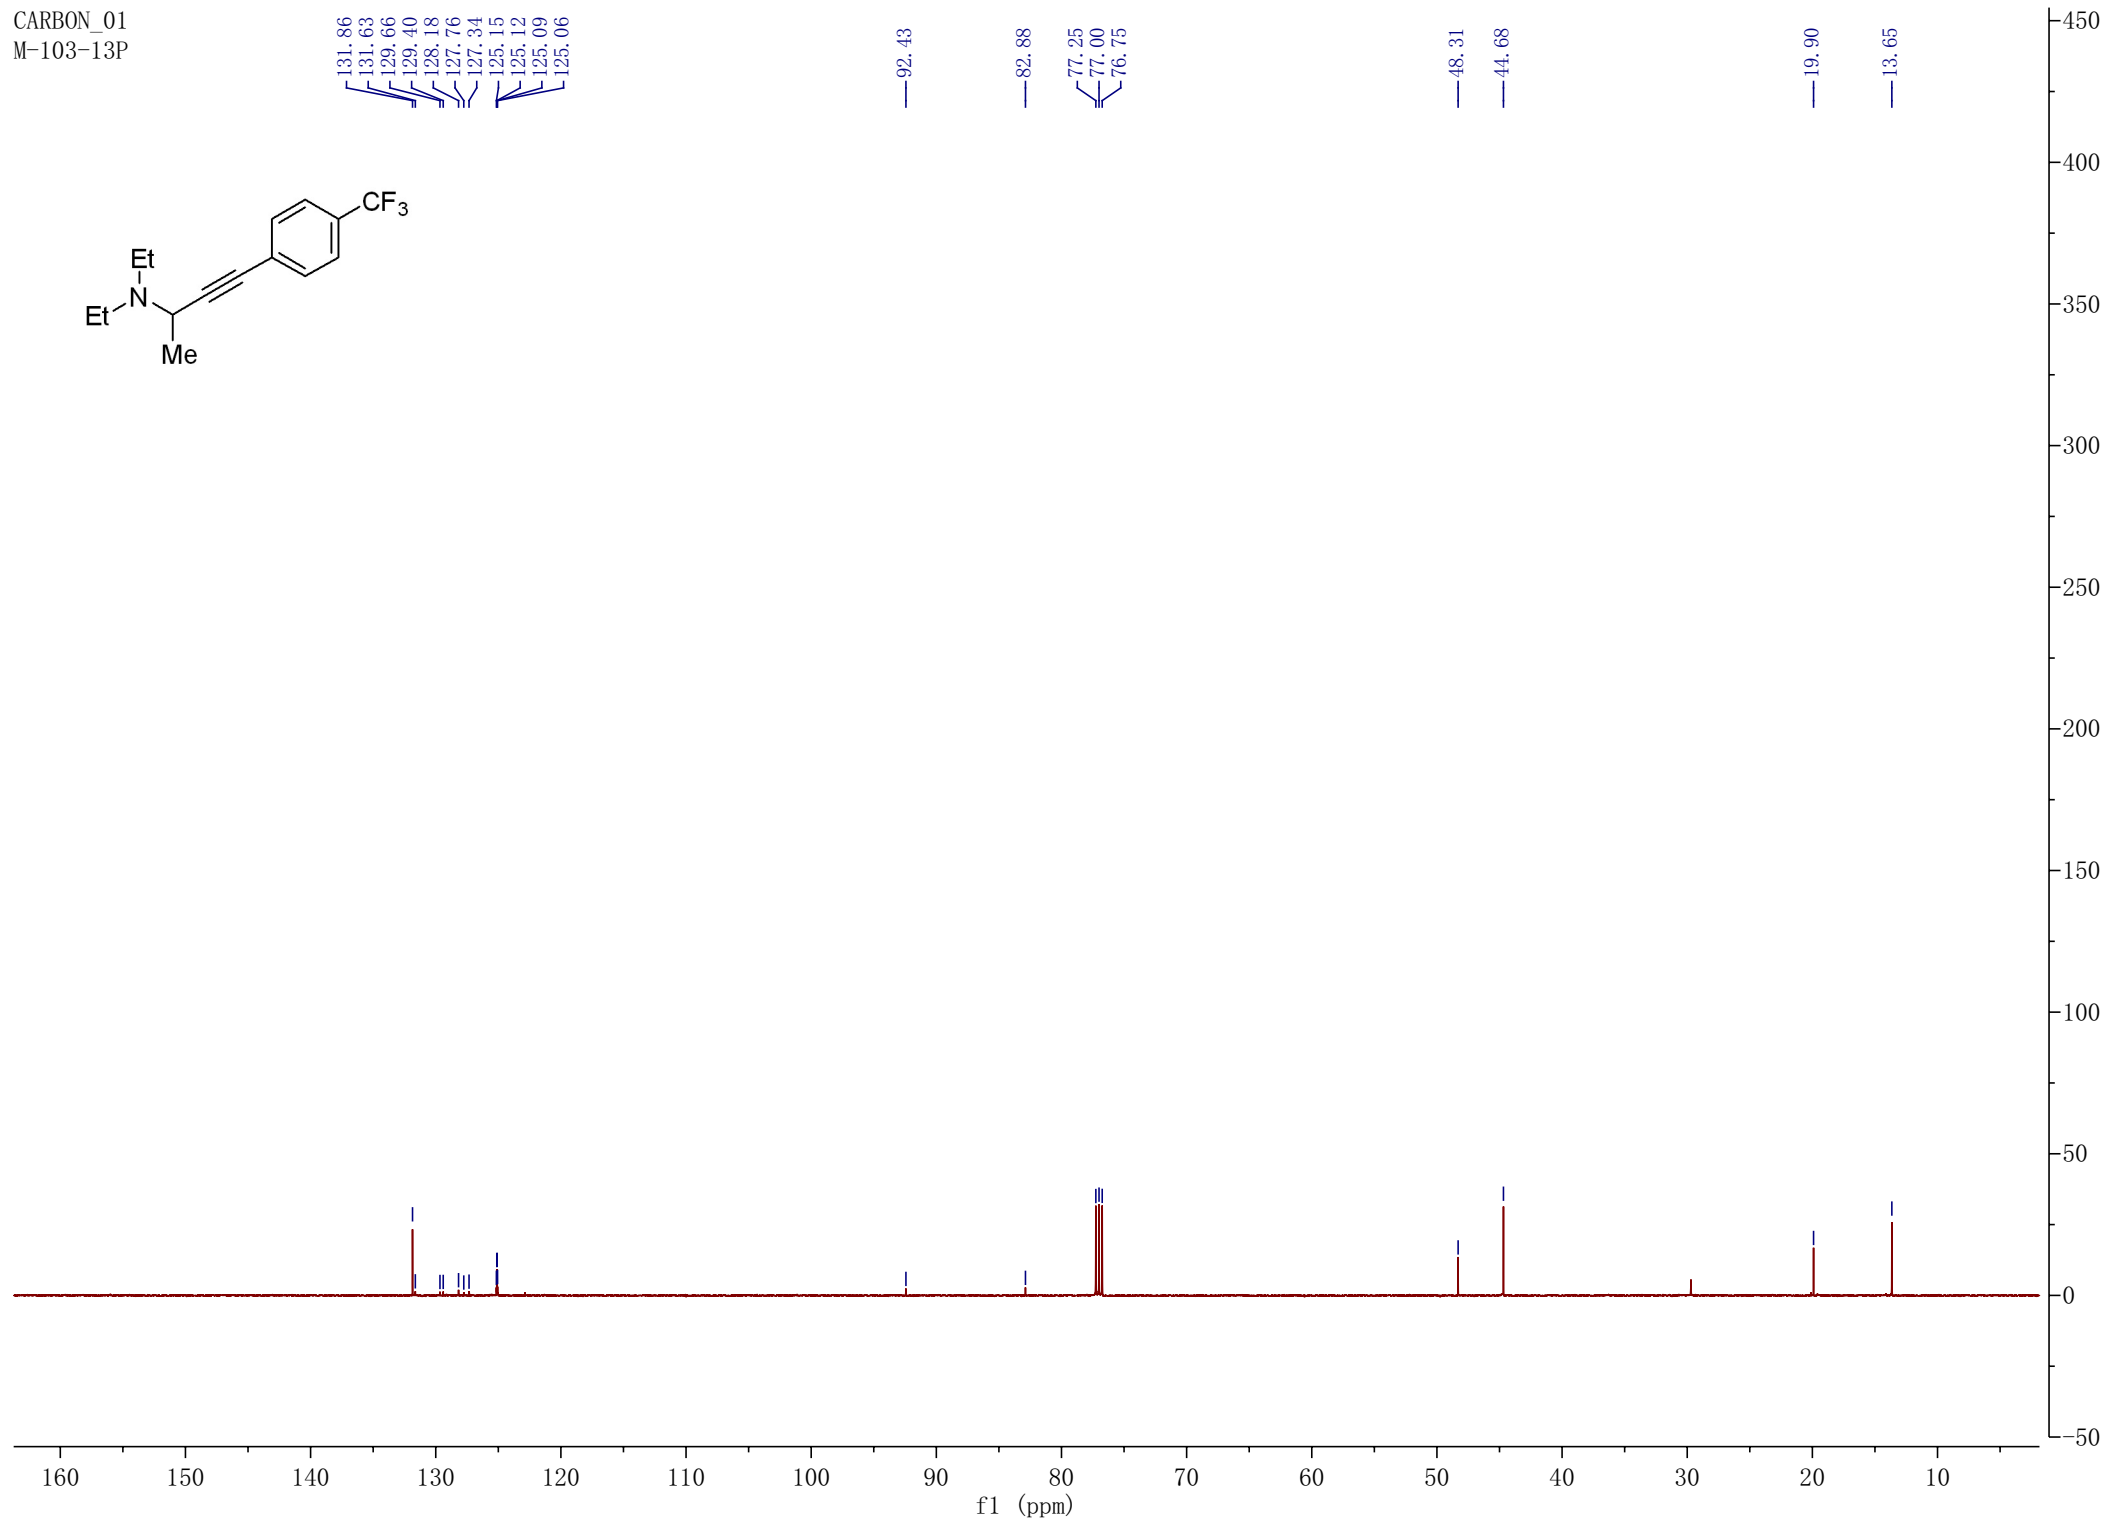

PROTON\_01  
M-103-8p

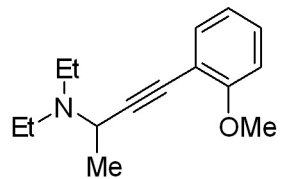

7.38  
7.38  
7.37  
7.36  
7.26  
7.24  
7.24  
7.23  
7.22  
6.89  
6.89  
6.87  
6.87  
6.86  
6.84

3.97  
3.95  
3.94  
3.93  
3.85

2.78  
2.77  
2.76  
2.74  
2.73  
2.72  
2.57  
2.56  
2.55  
2.53  
2.52  
2.51

1.44  
1.42  
1.13  
1.11  
1.10

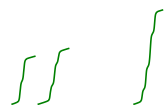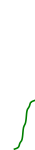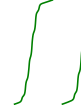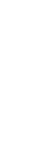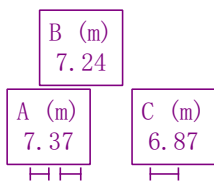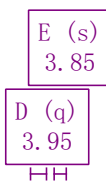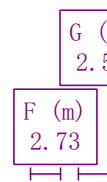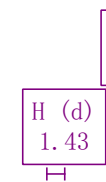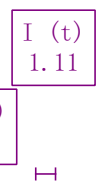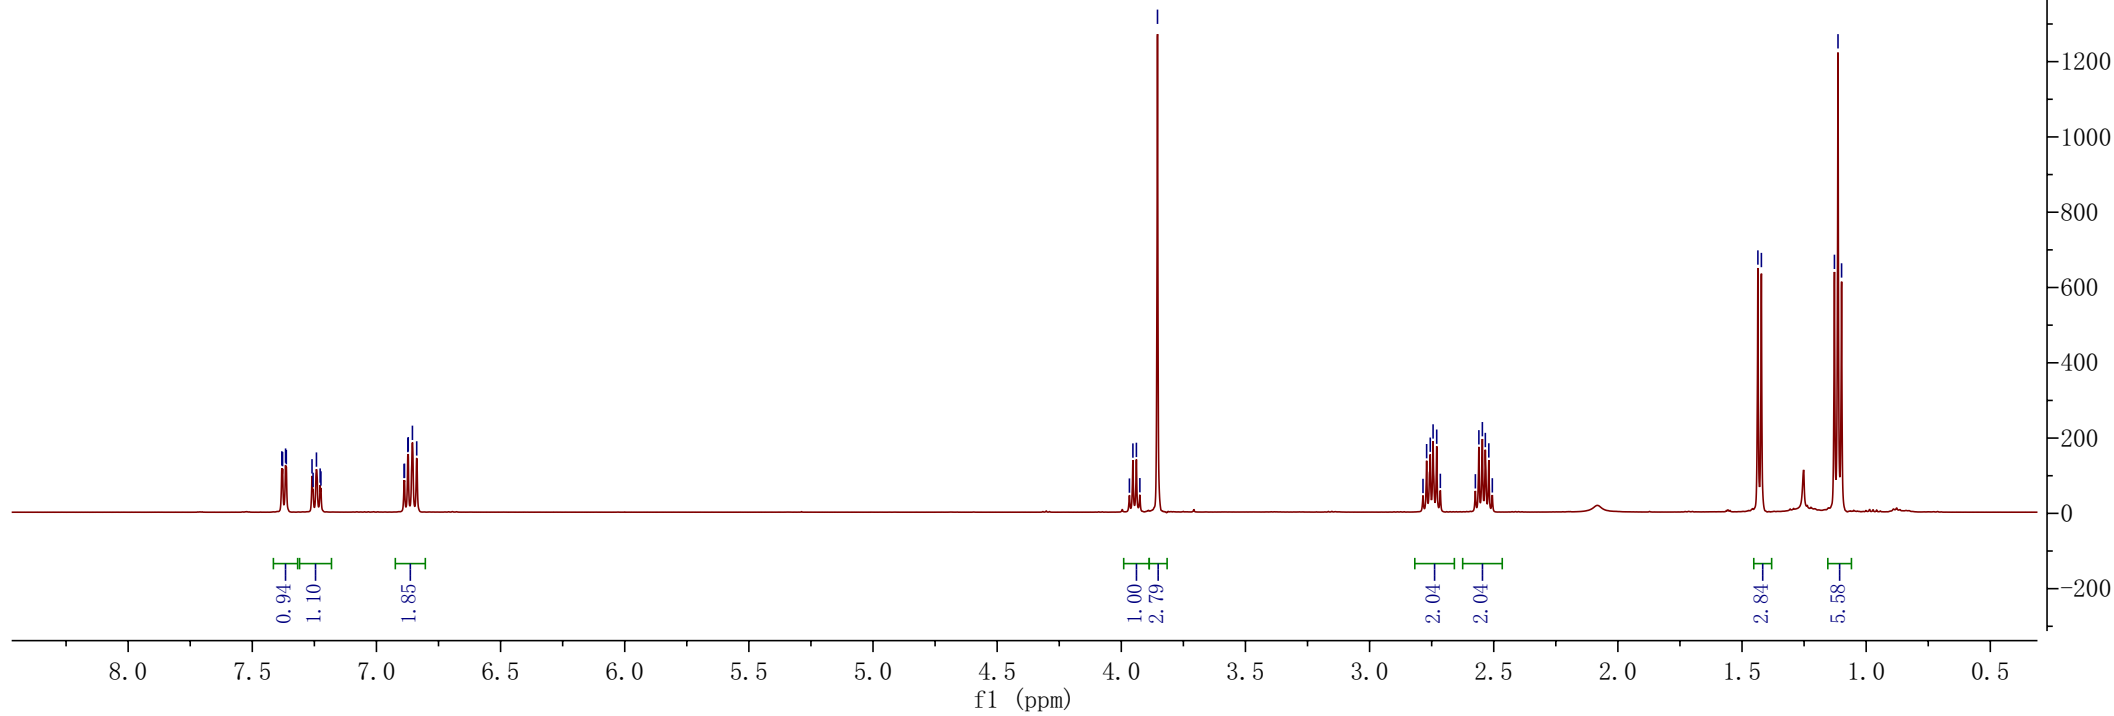

CARBON\_01  
M-103-8p

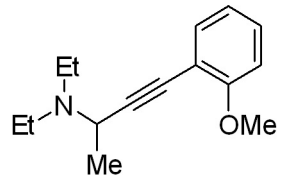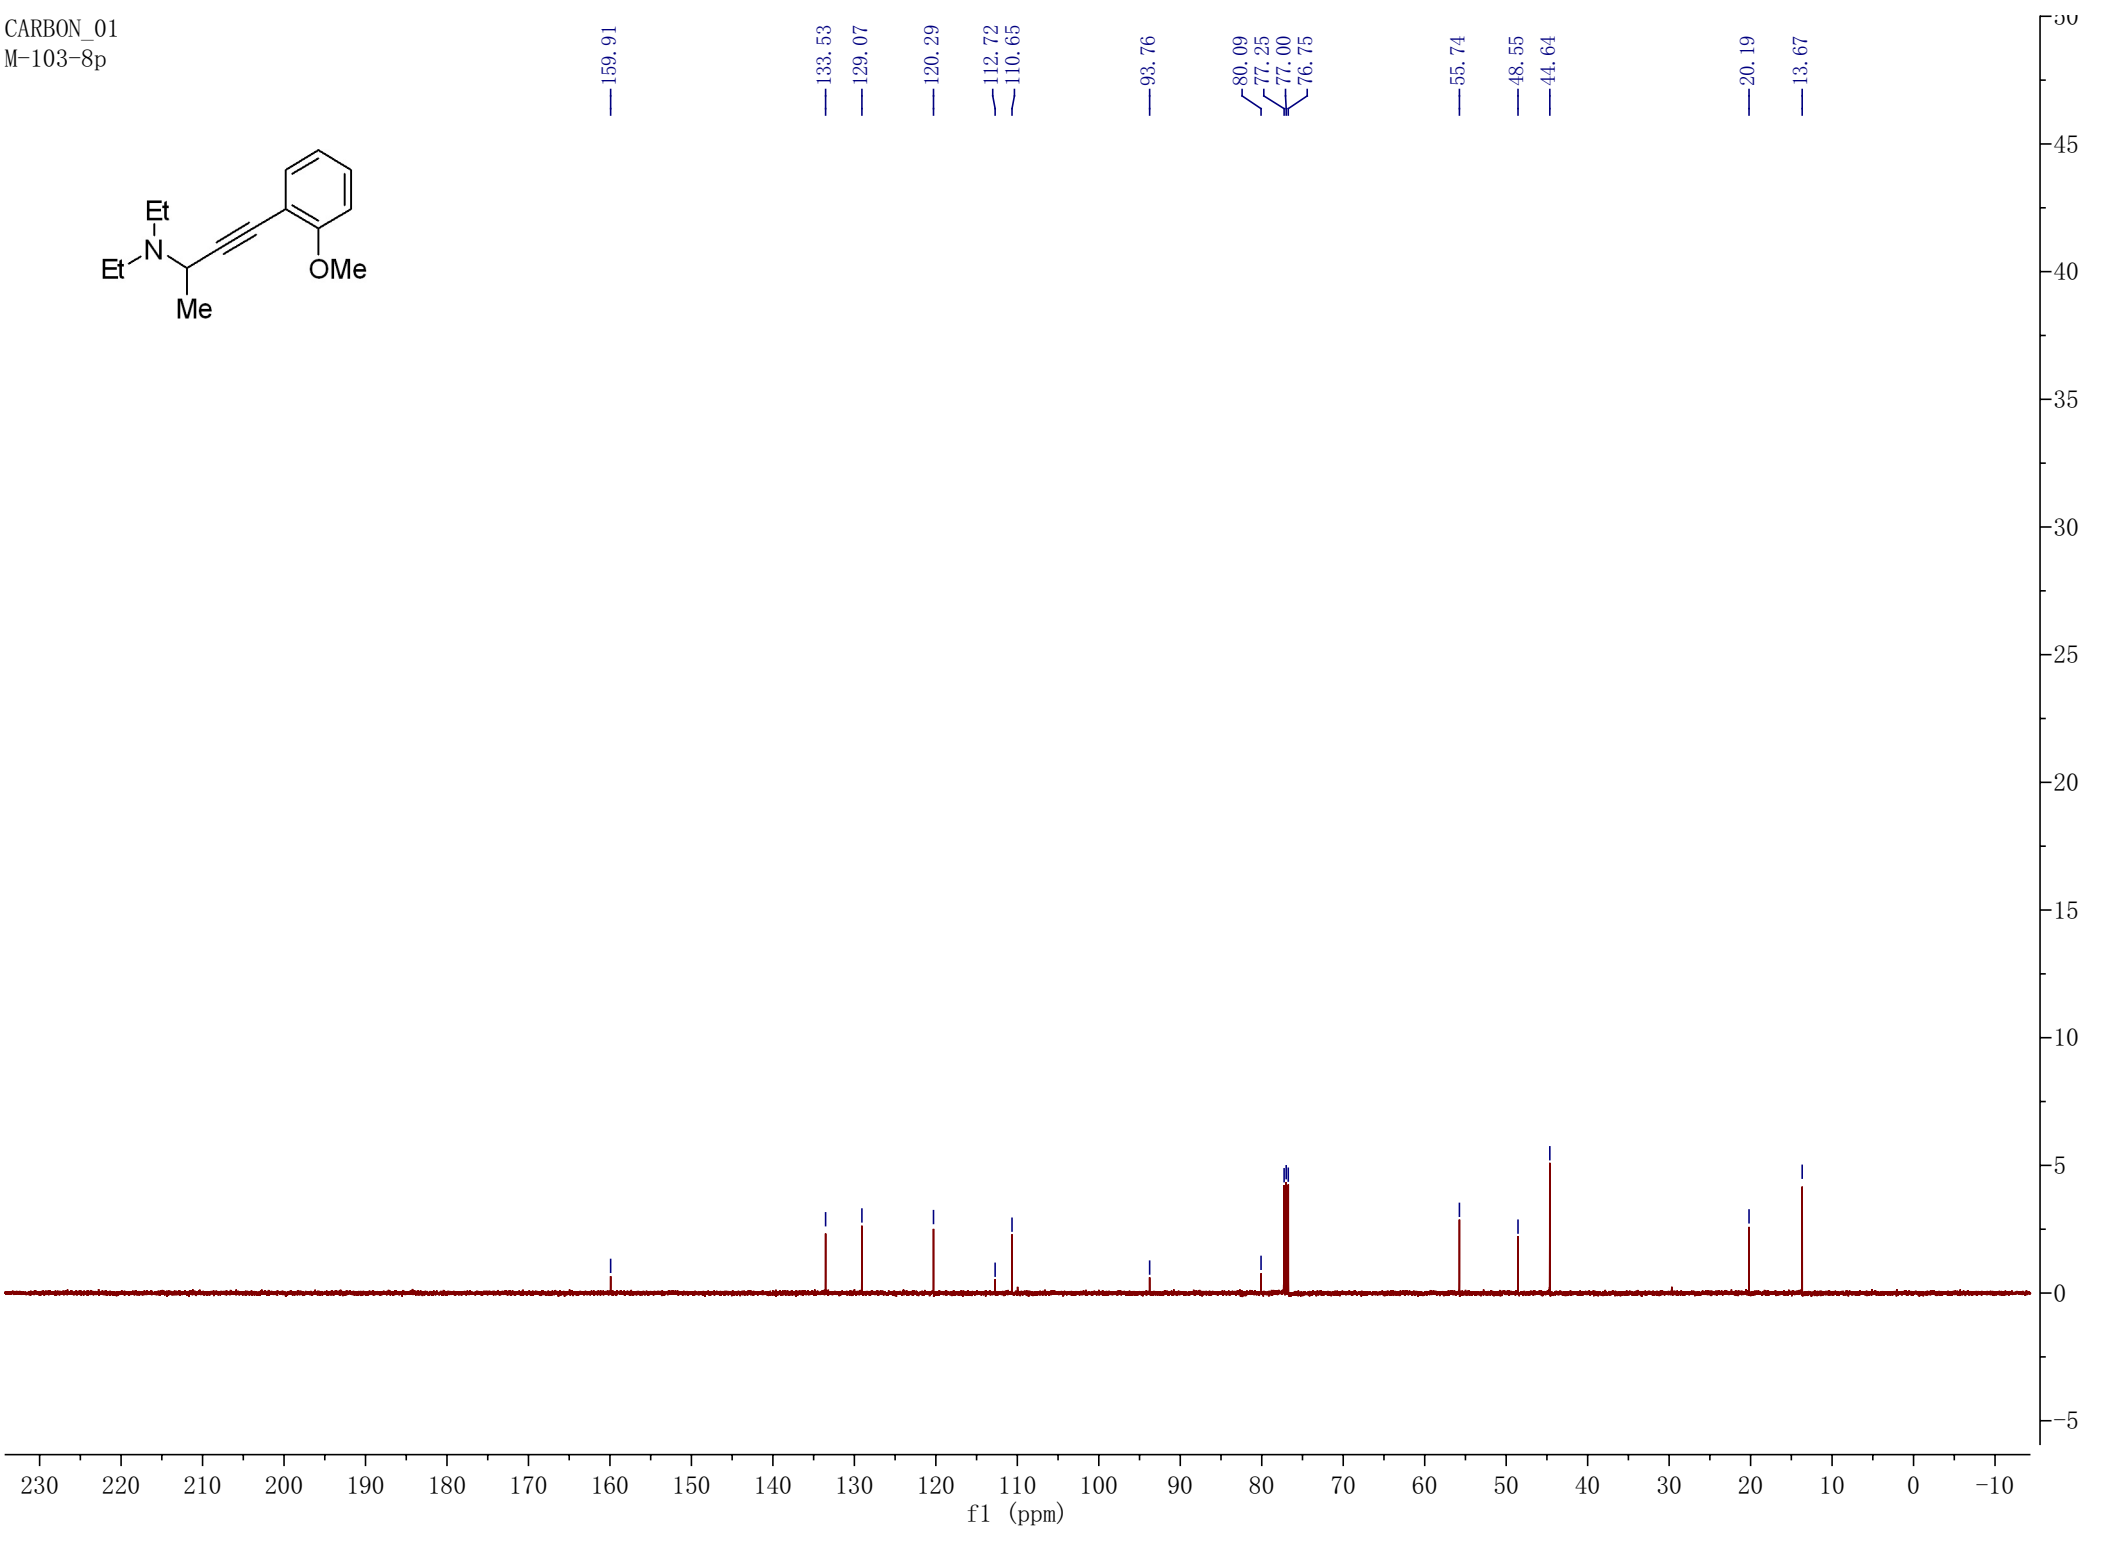

PROTON\_01  
M-103-16P

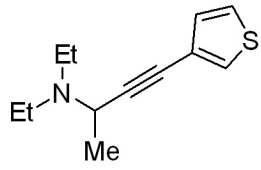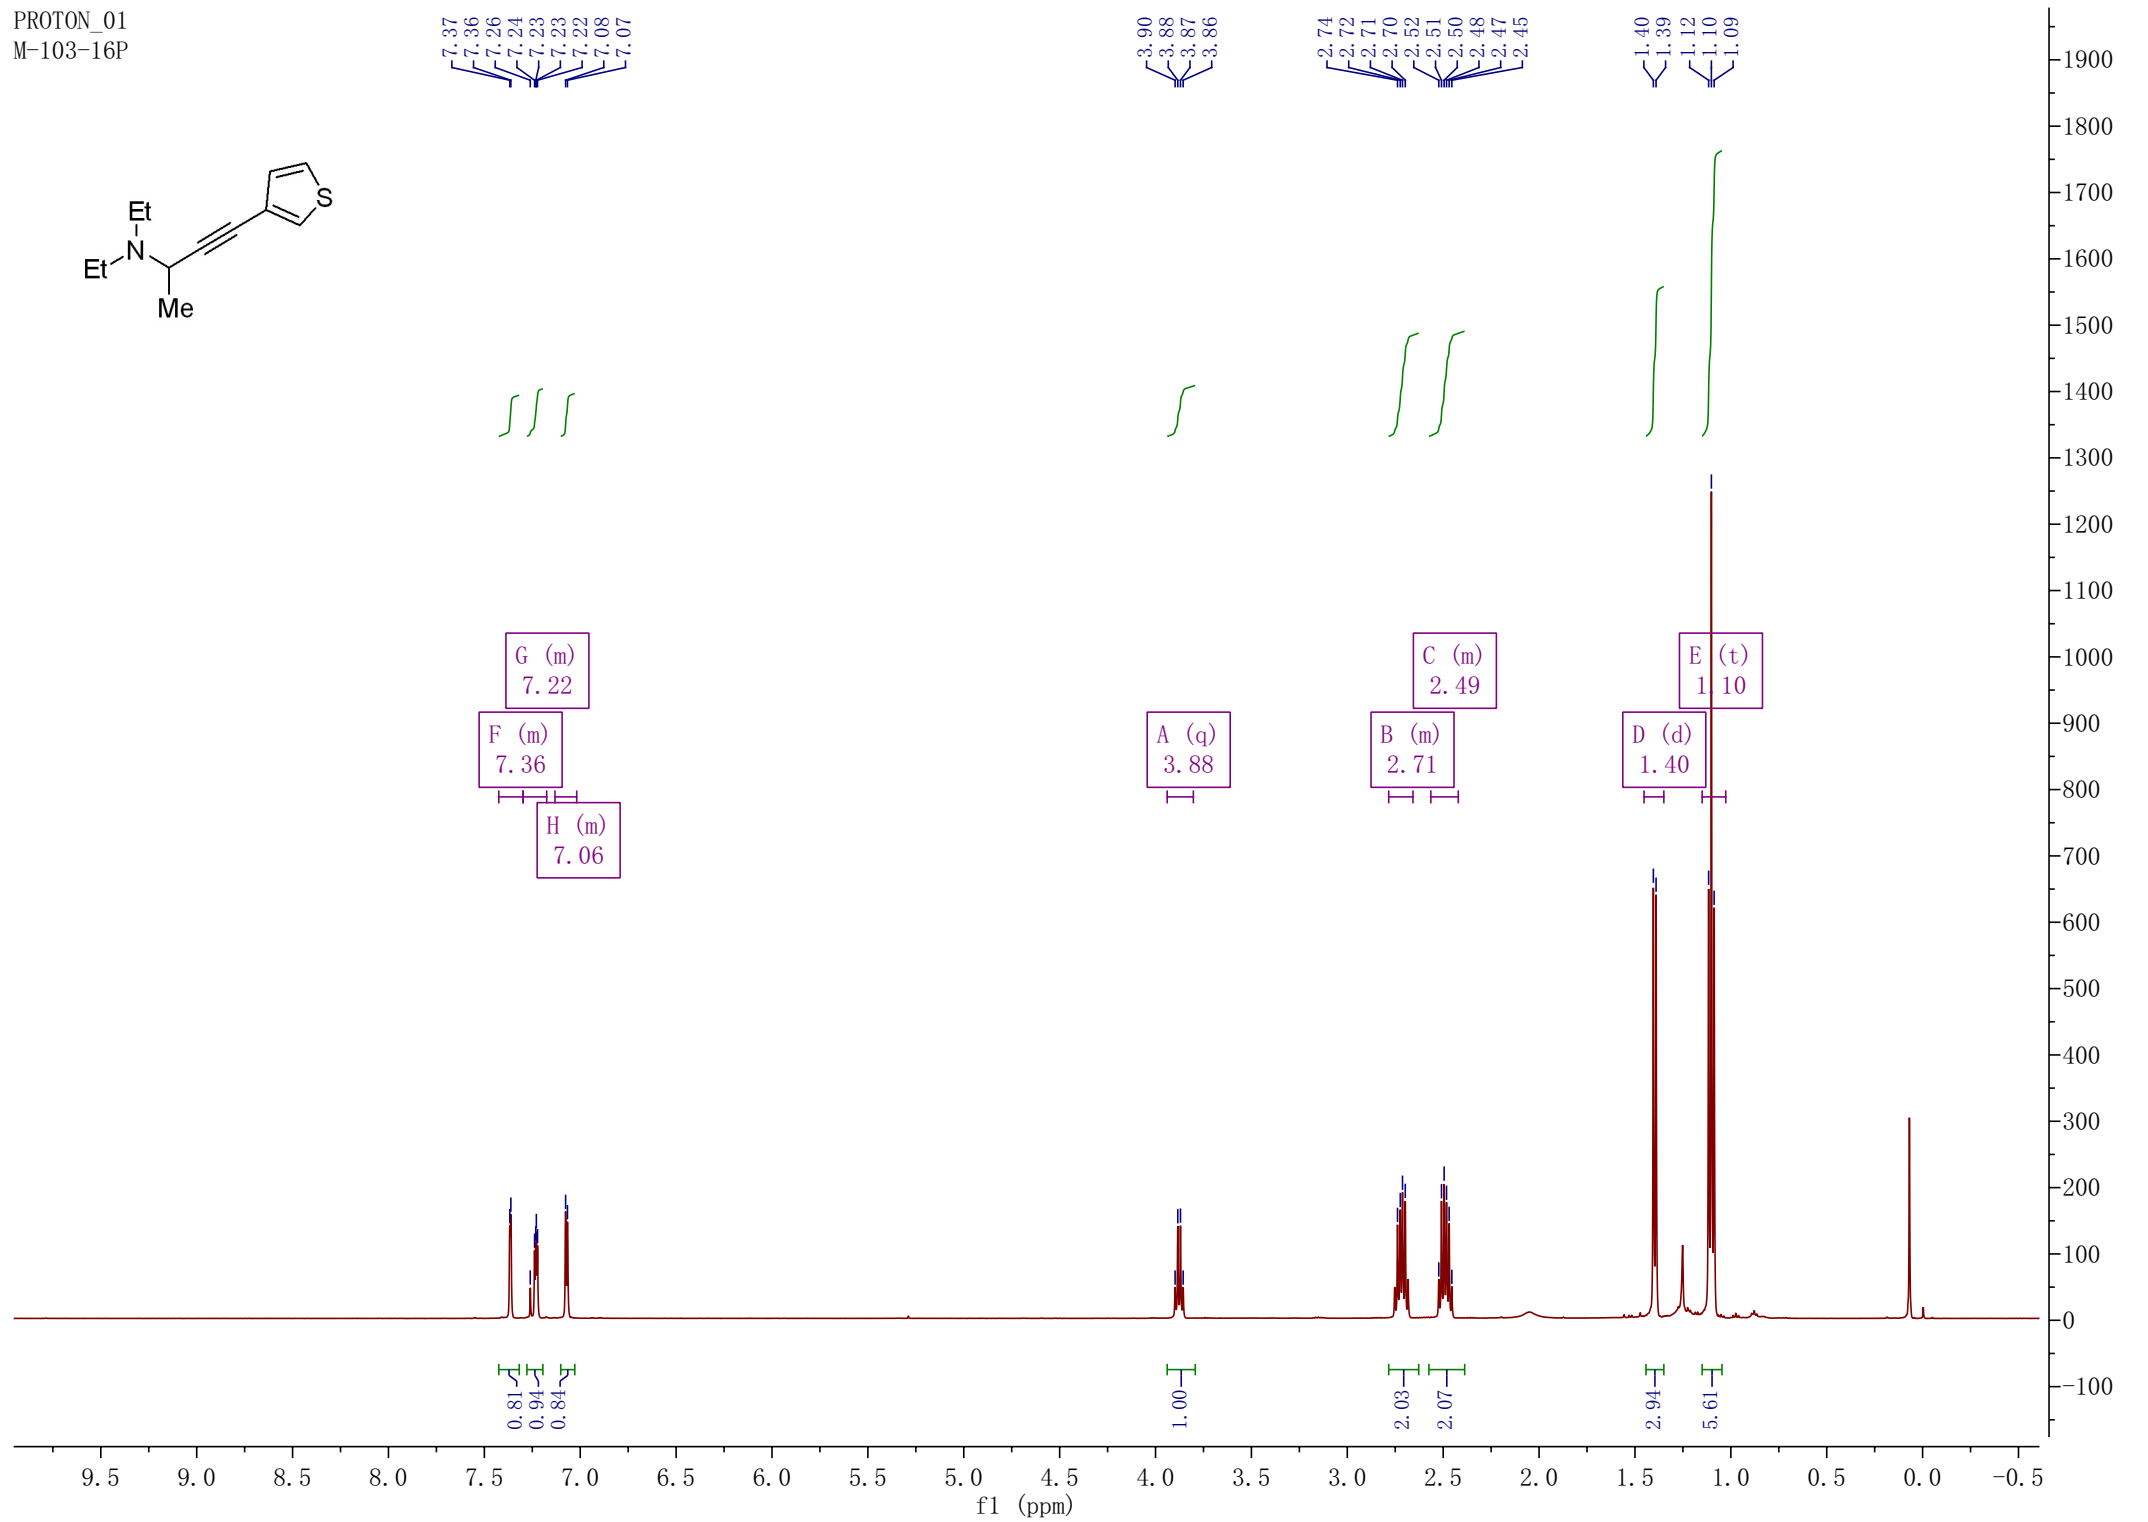

CARBON\_01  
M-103-16P

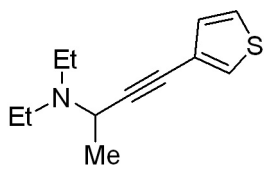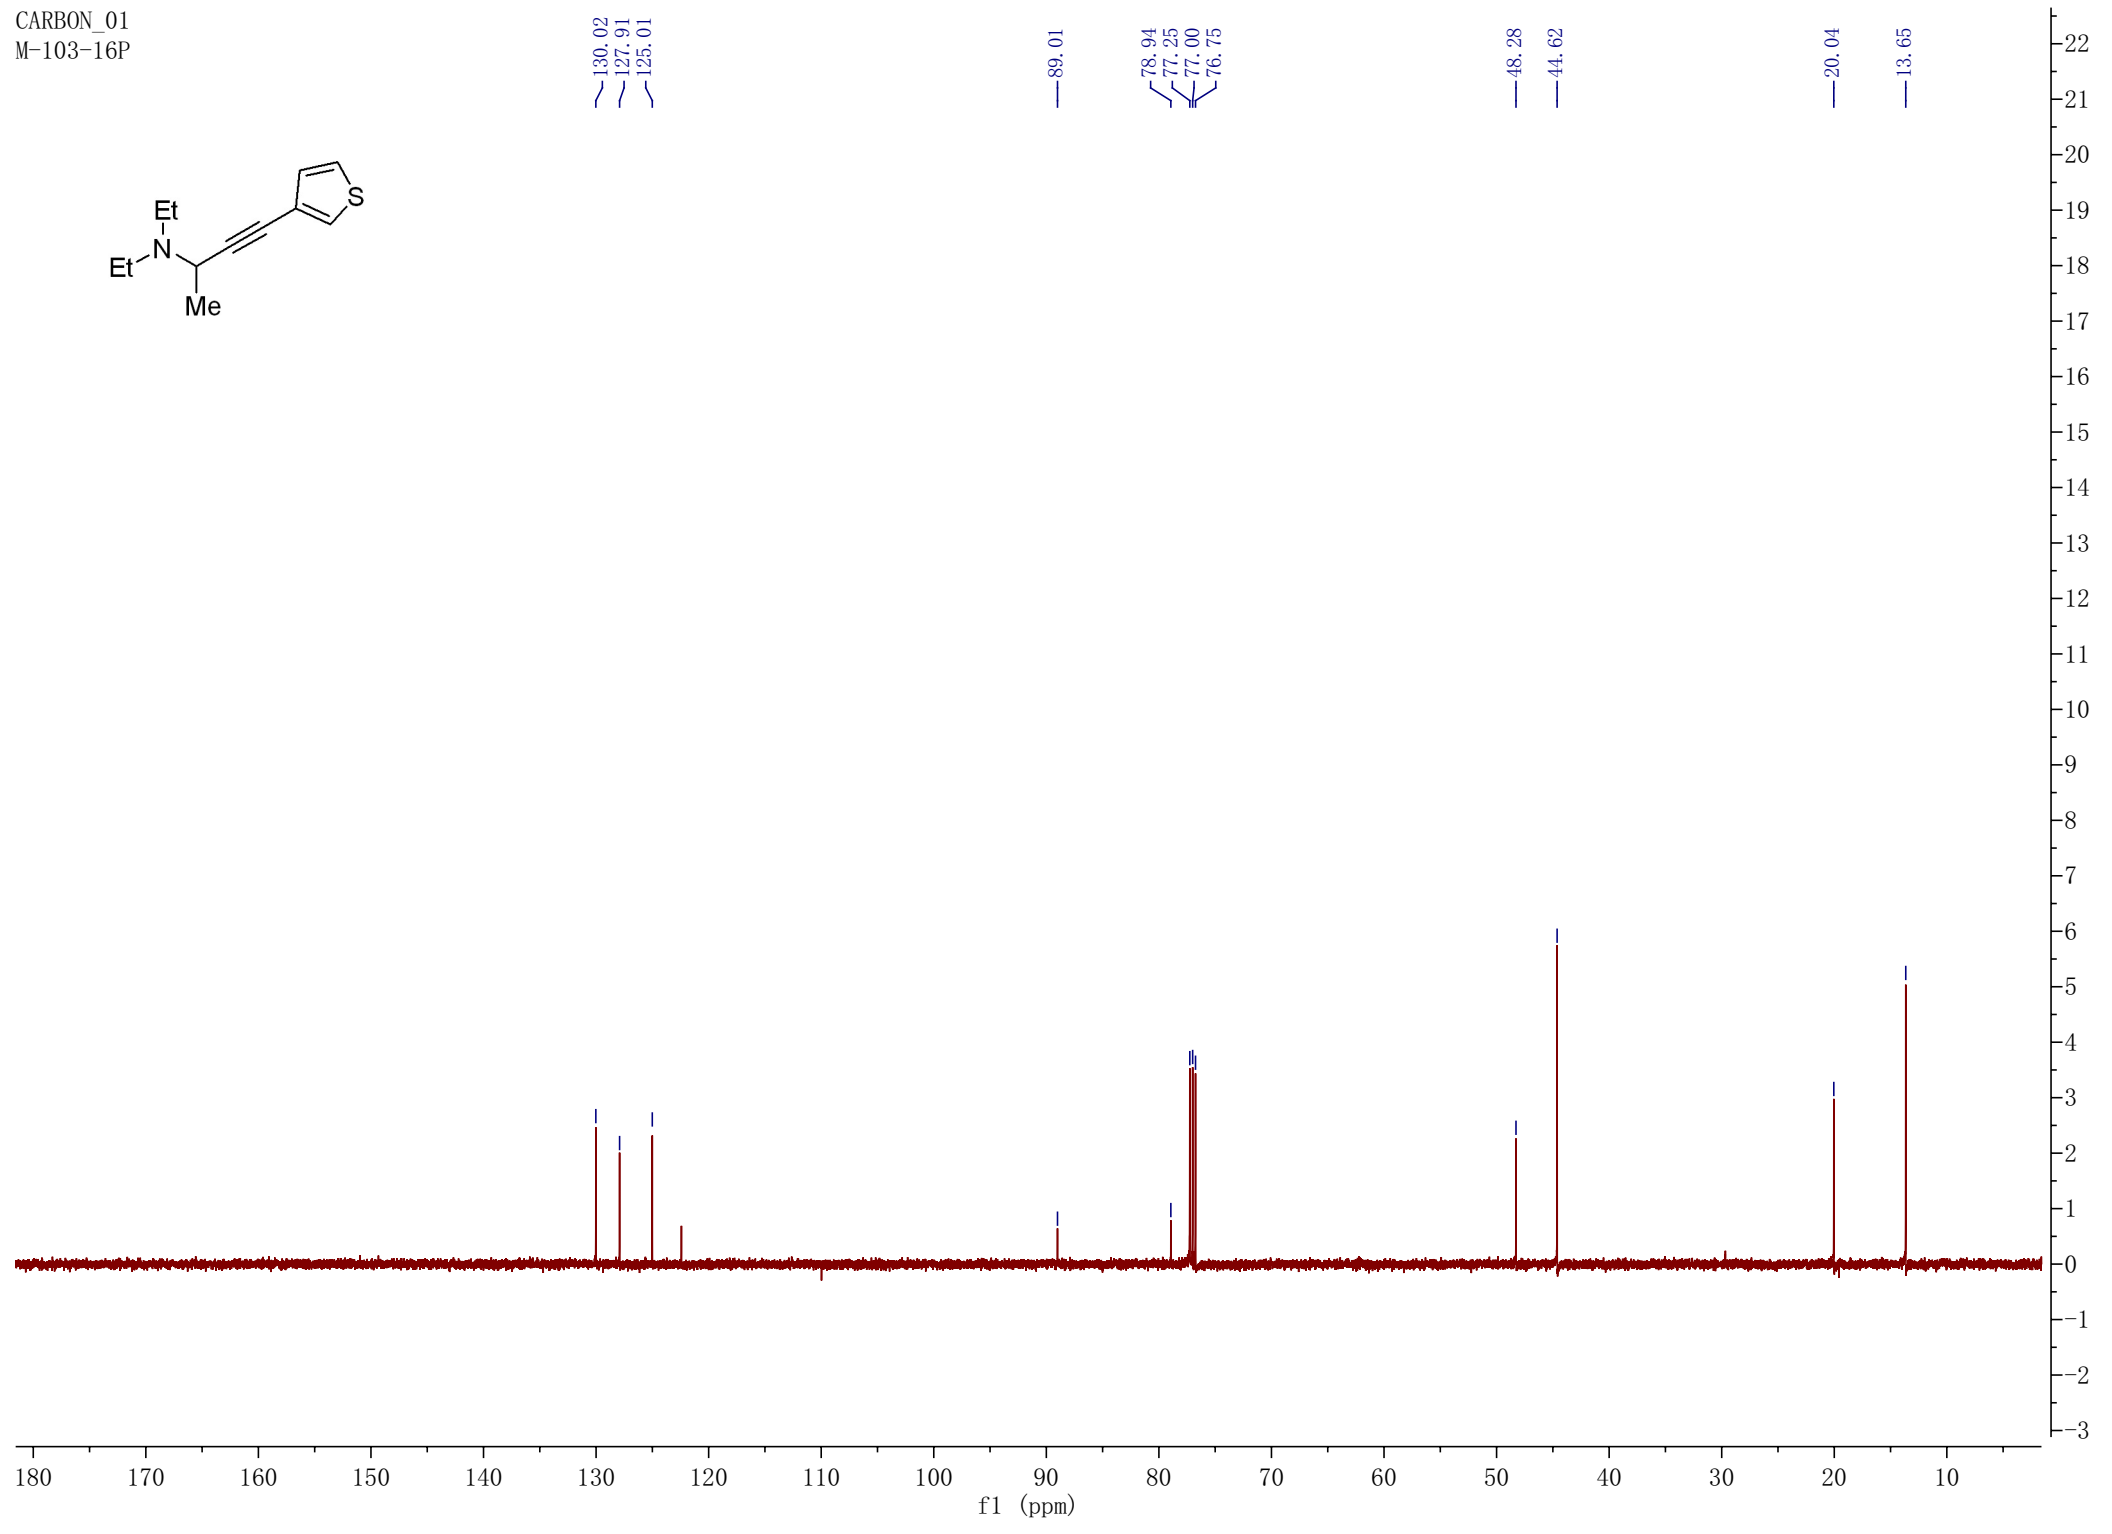

PROTON\_01  
m-103-19P

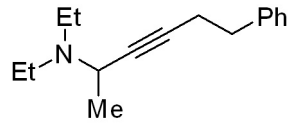

7.30  
7.28  
7.27  
7.26  
7.23  
7.21  
7.20  
7.19

3.65  
3.64  
3.64  
3.63  
3.63  
3.62  
3.61  
2.82  
2.81  
2.79  
2.62  
2.60  
2.59  
2.58  
2.56  
2.55  
2.50  
2.50  
2.35  
2.33  
2.32  
2.31

1.27  
1.26  
1.05  
1.03  
1.02

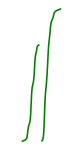

B (m)  
7.21  
A (m)  
7.27

C (q)  
3.63

E (m)  
2.58  
D (m)  
2.81  
G (m)  
2.33  
F (m)  
2.49

I (t)  
1.03  
H (d)  
1.27

1.86  
2.54

1.00

2.00  
2.03  
1.96  
2.01

3.13  
5.48

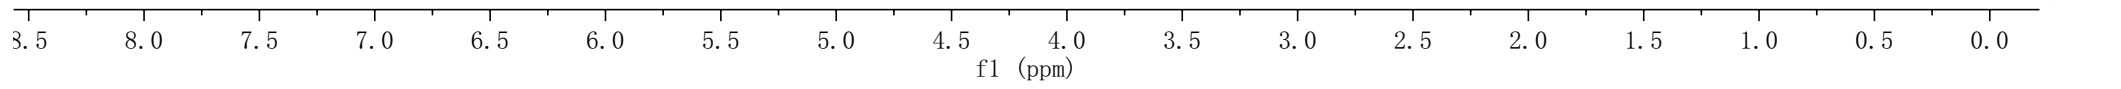



CARBON\_01  
m-103-19P

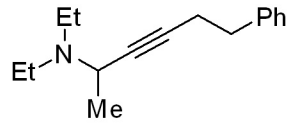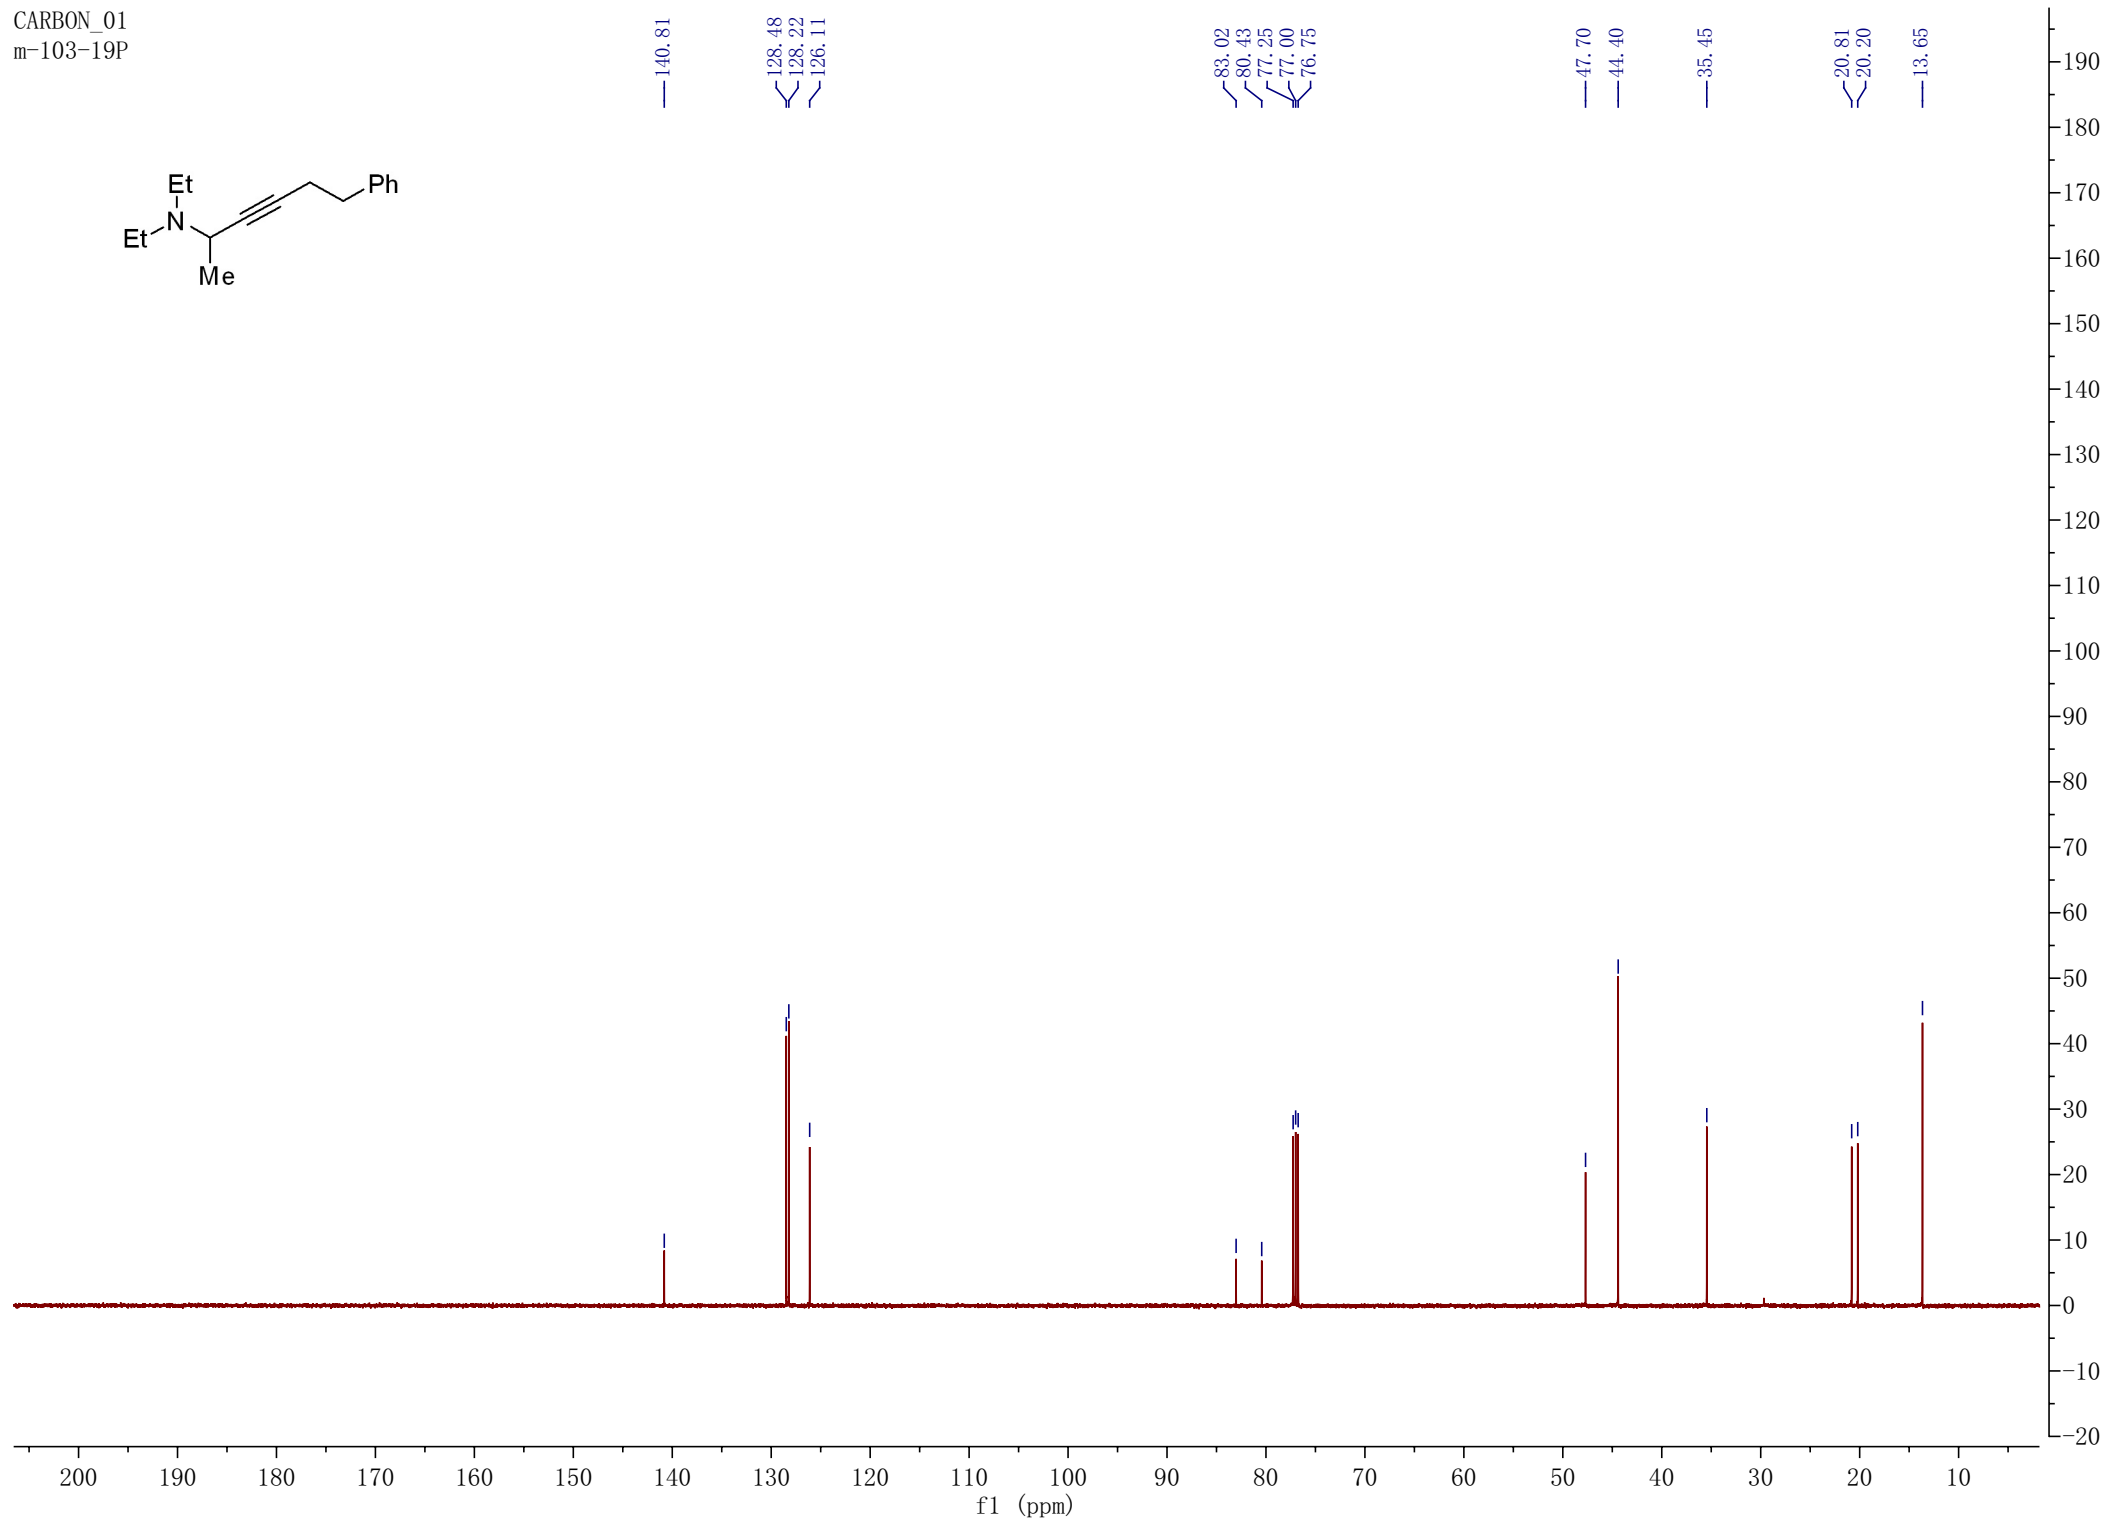

PROTON\_01  
m-103-18P

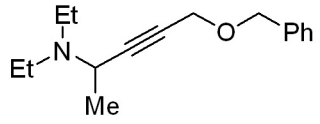

7.36  
7.35  
7.34  
7.33  
7.33  
7.32  
7.31  
7.30  
7.30  
7.29  
7.29  
7.29  
7.28  
7.26

4.60

4.20  
4.20

3.76  
3.75  
3.75  
3.74  
3.74  
3.73

2.70  
2.68  
2.67  
2.66  
2.64

2.46  
2.45  
2.44  
2.42  
2.41  
2.40

1.35  
1.34

1.09  
1.08  
1.07

A (m)  
7.31

B (s)  
4.60

C (s)  
4.20

D (q)  
3.75

E (m)  
2.68

F (m)  
2.43

G (d)  
1.34

H (t)  
1.08

4.67

2.00

1.99

1.06

2.10

2.07

3.06

5.90

9.5 9.0 8.5 8.0 7.5 7.0 6.5 6.0 5.5 5.0 4.5 4.0 3.5 3.0 2.5 2.0 1.5 1.0 0.5 0.0

f1 (ppm)

6000  
5500  
5000  
4500  
4000  
3500  
3000  
2500  
2000  
1500  
1000  
500  
0  
-500

CARBON\_01  
m-103-18P

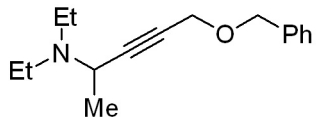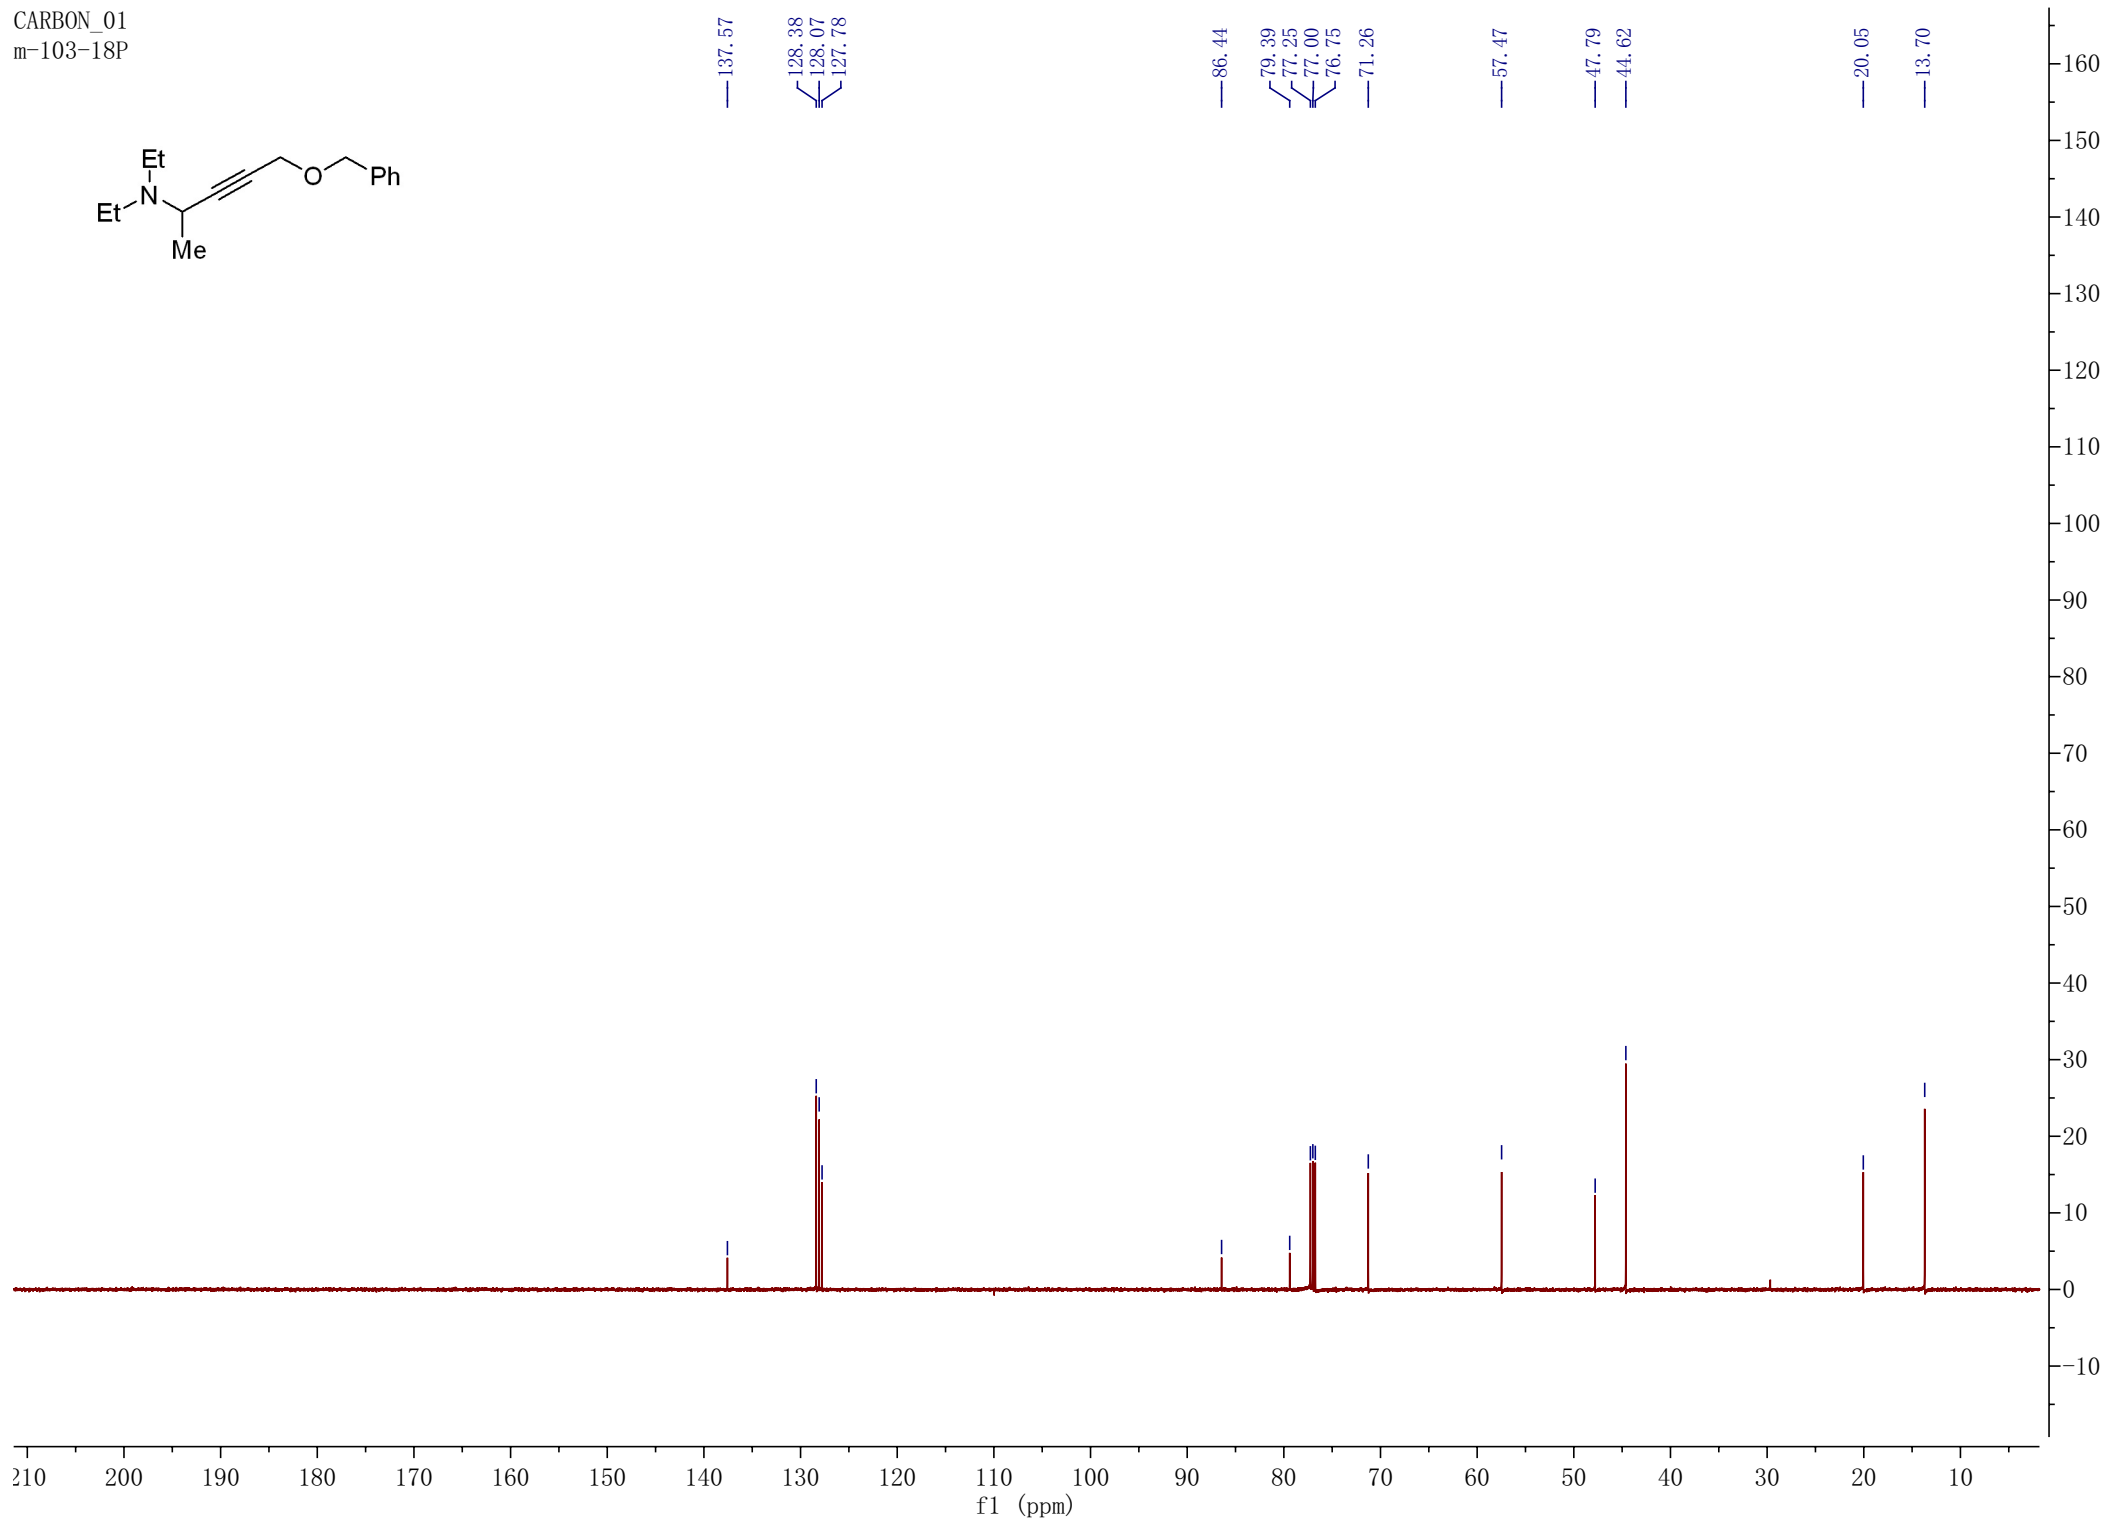

PROTON\_01  
m-102-7P

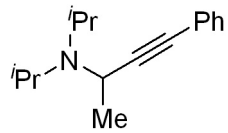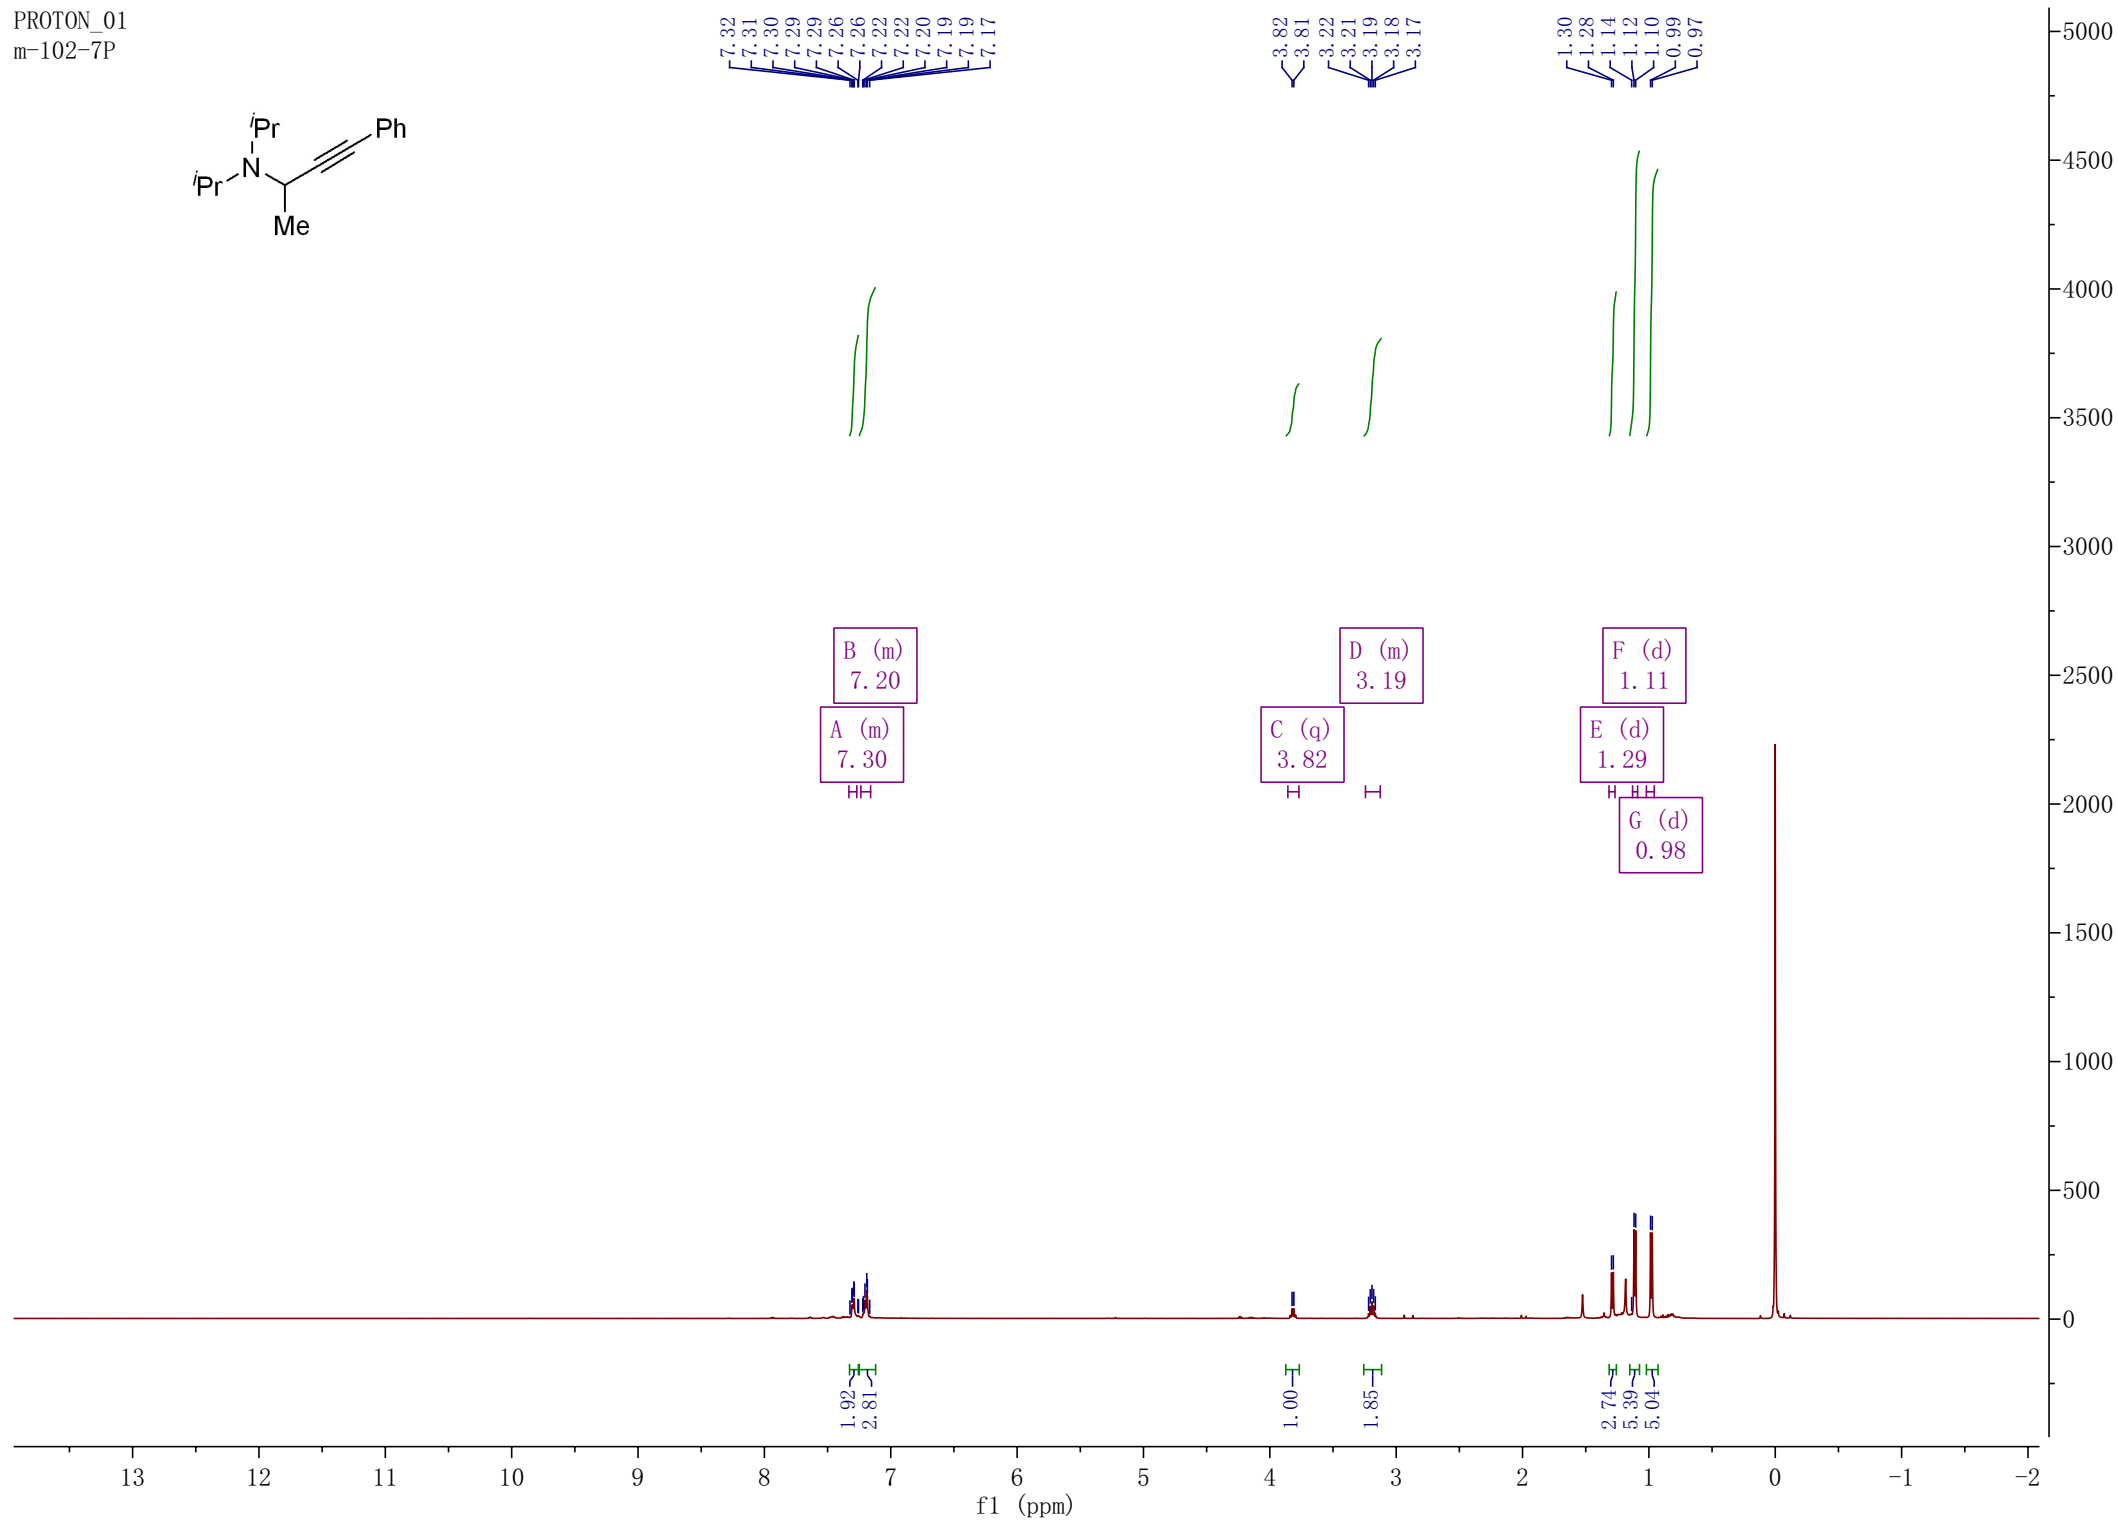

CARBON\_01  
m-102-7P

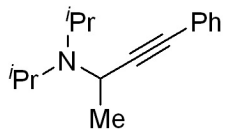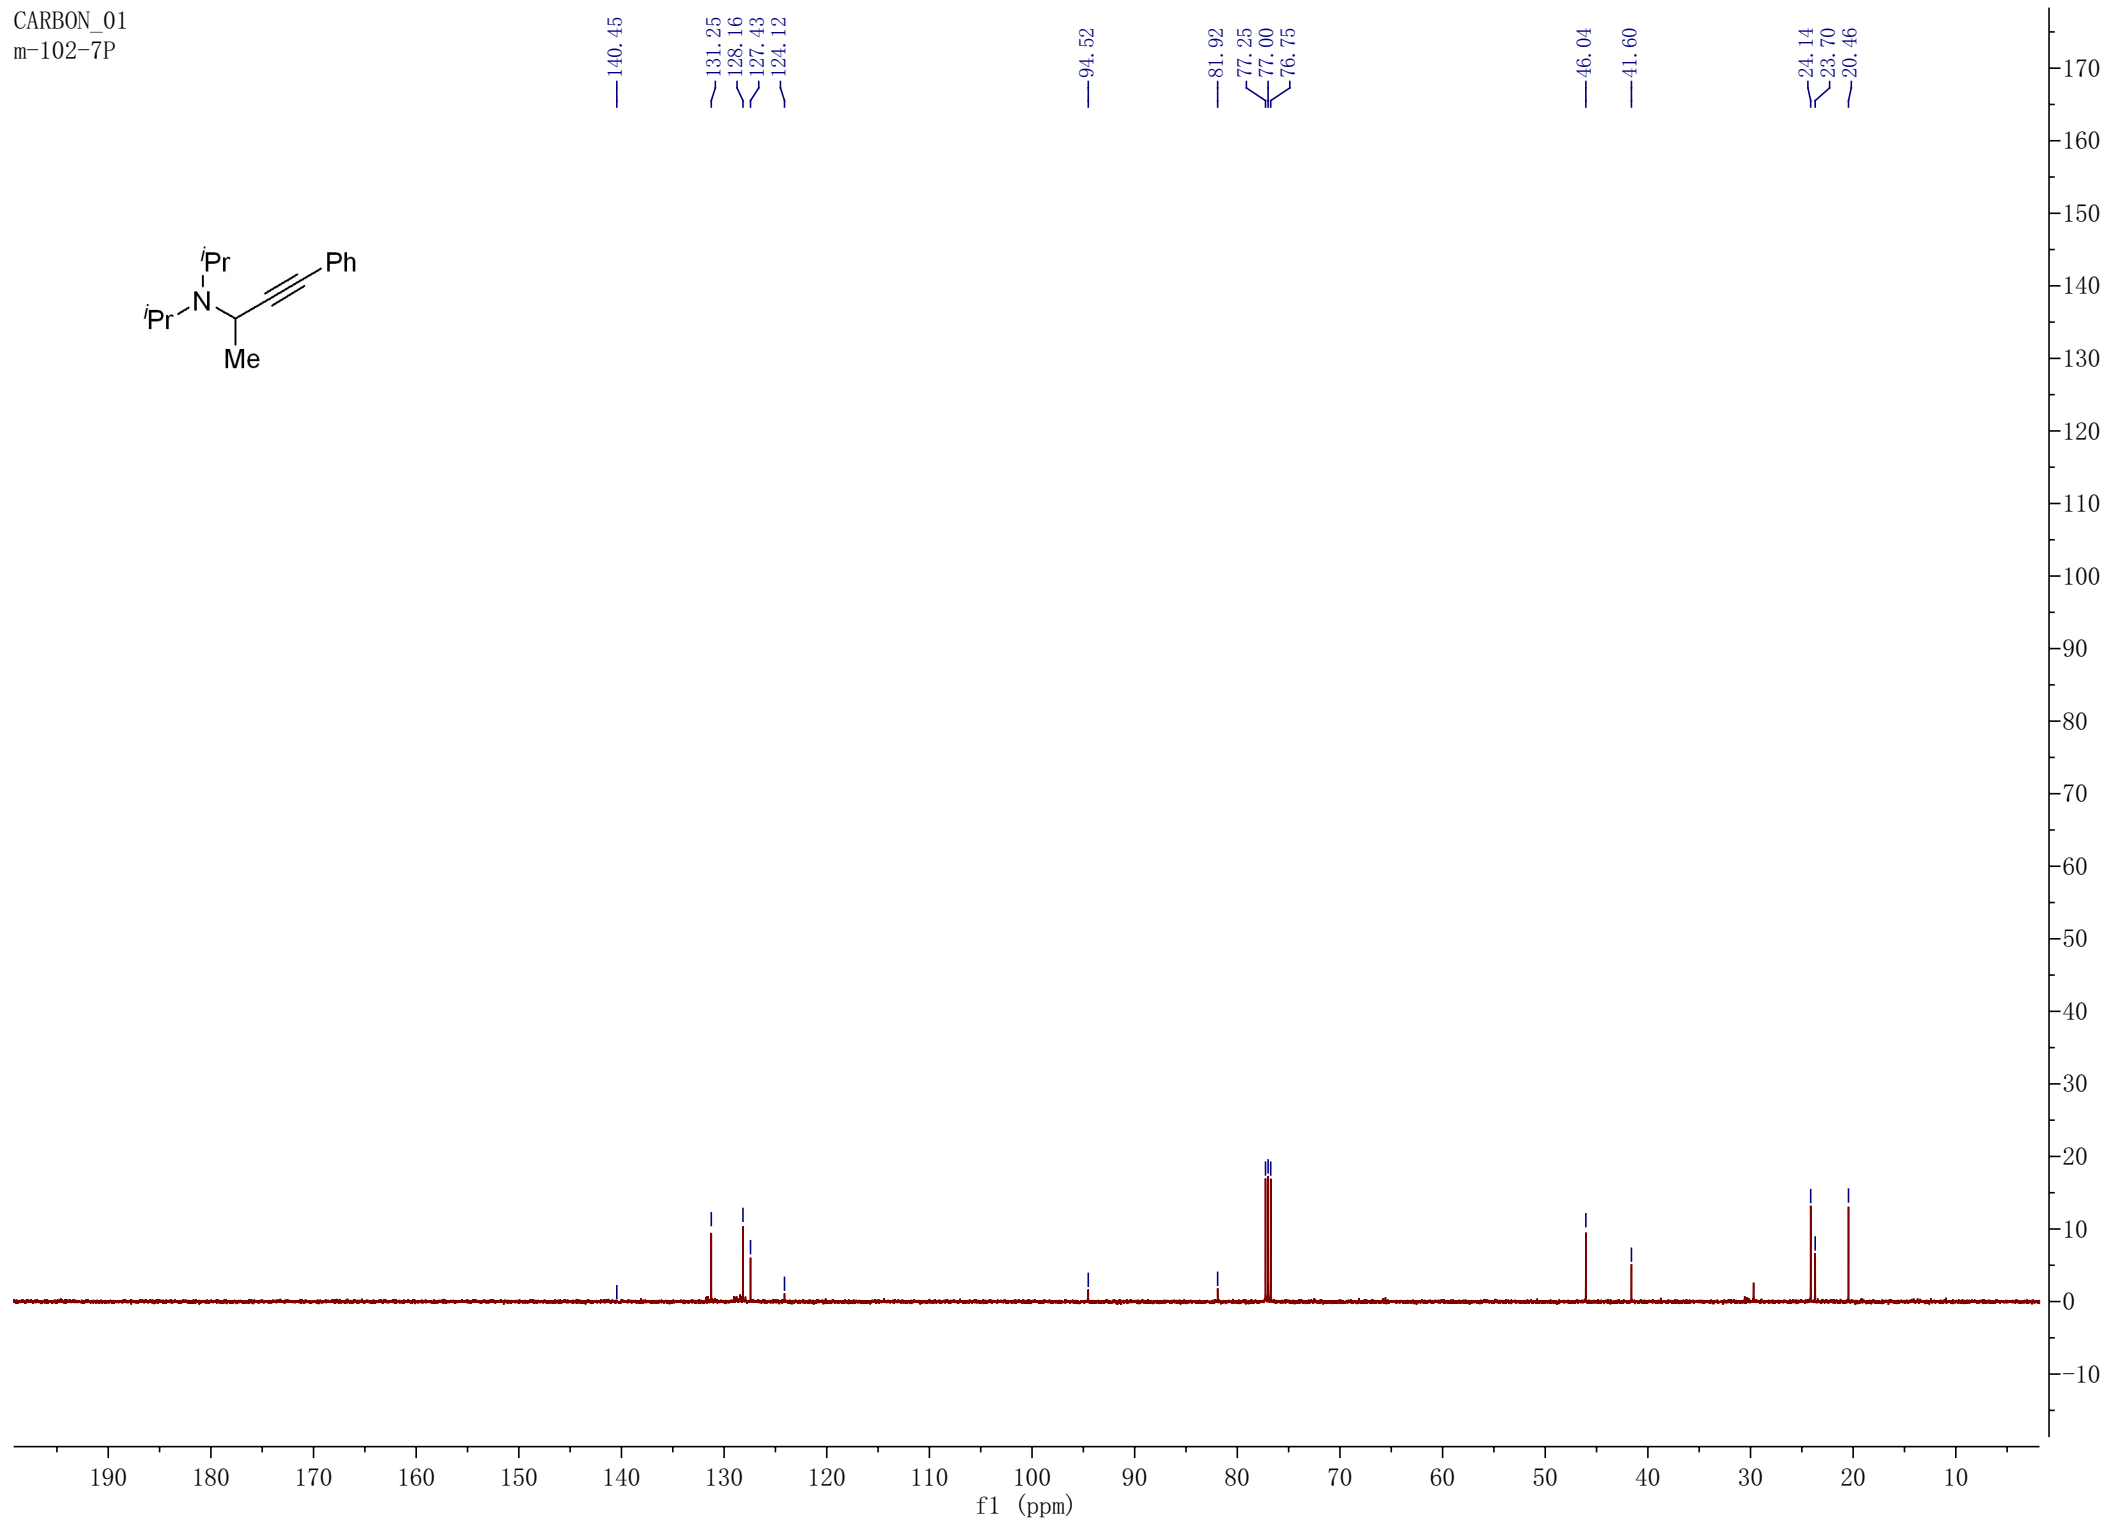

PROTON\_01  
m-102-8P

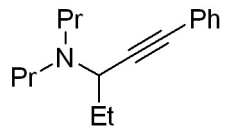

7.43  
7.43  
7.42  
7.29  
7.28  
7.28

3.54  
3.52  
3.51  
2.53  
2.52  
2.51  
2.50  
2.49  
2.45  
2.44  
2.43  
2.42  
2.41  
2.40  
2.39  
1.73  
1.71  
1.70  
1.68  
1.67  
1.47  
1.46  
1.04  
1.03  
0.92  
0.90  
0.89

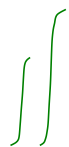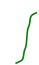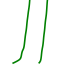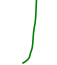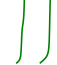

A (m)  
7.42

B (m)  
7.28

C (t)  
3.52

D (m)  
2.51

E (m)  
2.42

F (m)  
1.69

G (m)  
1.49

H (t)  
1.04

I (t)  
0.90

1.73  
2.67

1.00

1.97  
1.96

2.56  
3.99

2.82  
5.62

9.0 8.5 8.0 7.5 7.0 6.5 6.0 5.5 5.0 4.5 4.0 3.5 3.0 2.5 2.0 1.5 1.0 0.5 0.0

f1 (ppm)

4500  
4000  
3500  
3000  
2500  
2000  
1500  
1000  
500  
0

CARBON\_01  
m-102-8P

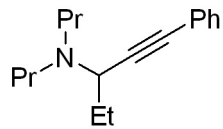

131.67  
128.15  
127.60  
123.73

89.20

84.35

77.25

77.00

76.75

56.00

53.60

27.41

21.71

11.97

11.43

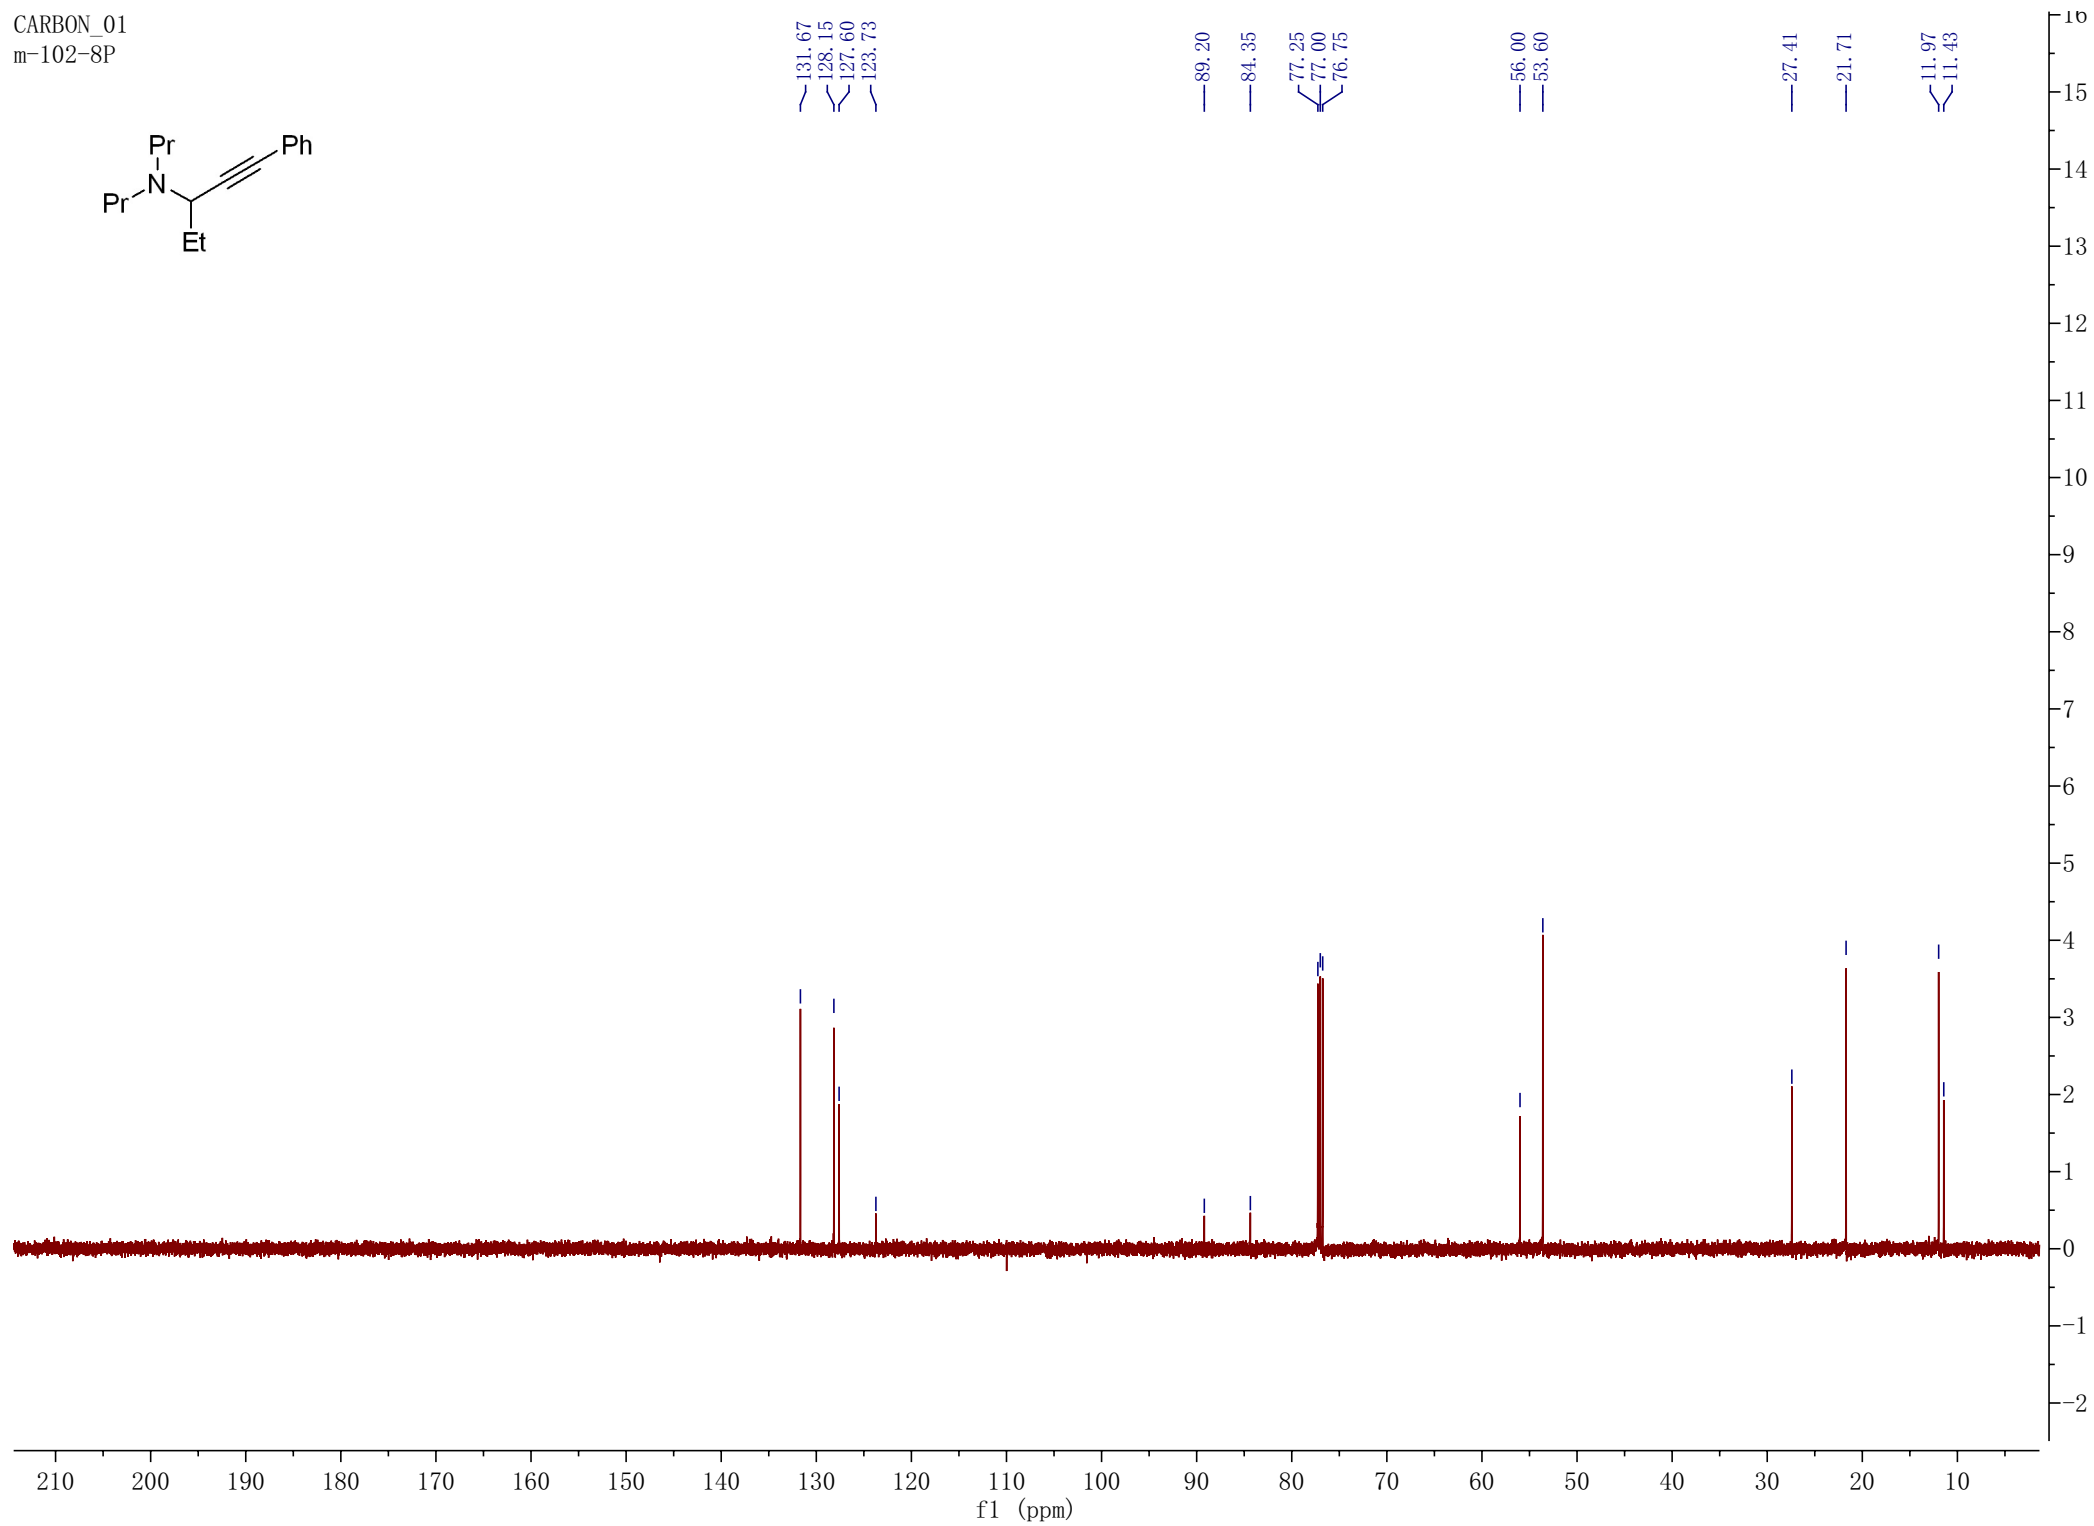

PROTON\_01  
m-102-6P

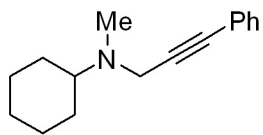

7.43  
7.42  
7.42  
7.41  
7.31  
7.30  
7.29  
7.28  
7.26

3.63

2.47  
2.46  
2.45  
2.45  
2.44  
2.42  
1.98  
1.95  
1.86  
1.80  
1.78  
1.63  
1.61  
1.33  
1.31  
1.29  
1.25  
1.24  
1.22  
1.20  
1.17  
1.15  
1.14  
1.12  
1.12  
1.10

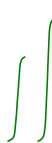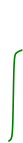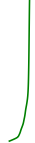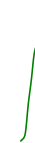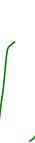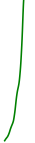

B (m)  
7.29

A (m)  
7.42

HH

C (s)  
3.63

H

D (m)  
2.45

HH

E (m)  
1.95

HH

F (m)  
1.78

HH

H (m)  
1.21

HH

G (m)  
1.62

HH

1.85

2.91

2.00

4.06

2.15

2.18

1.23

6.25

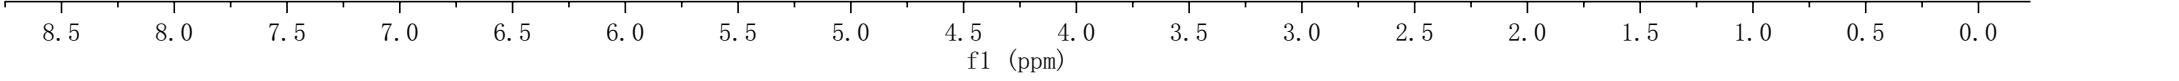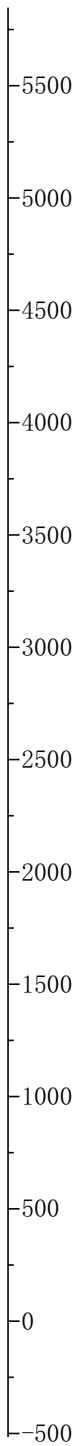



CARBON\_01  
m-102-6P

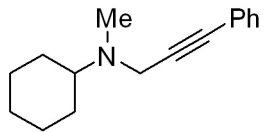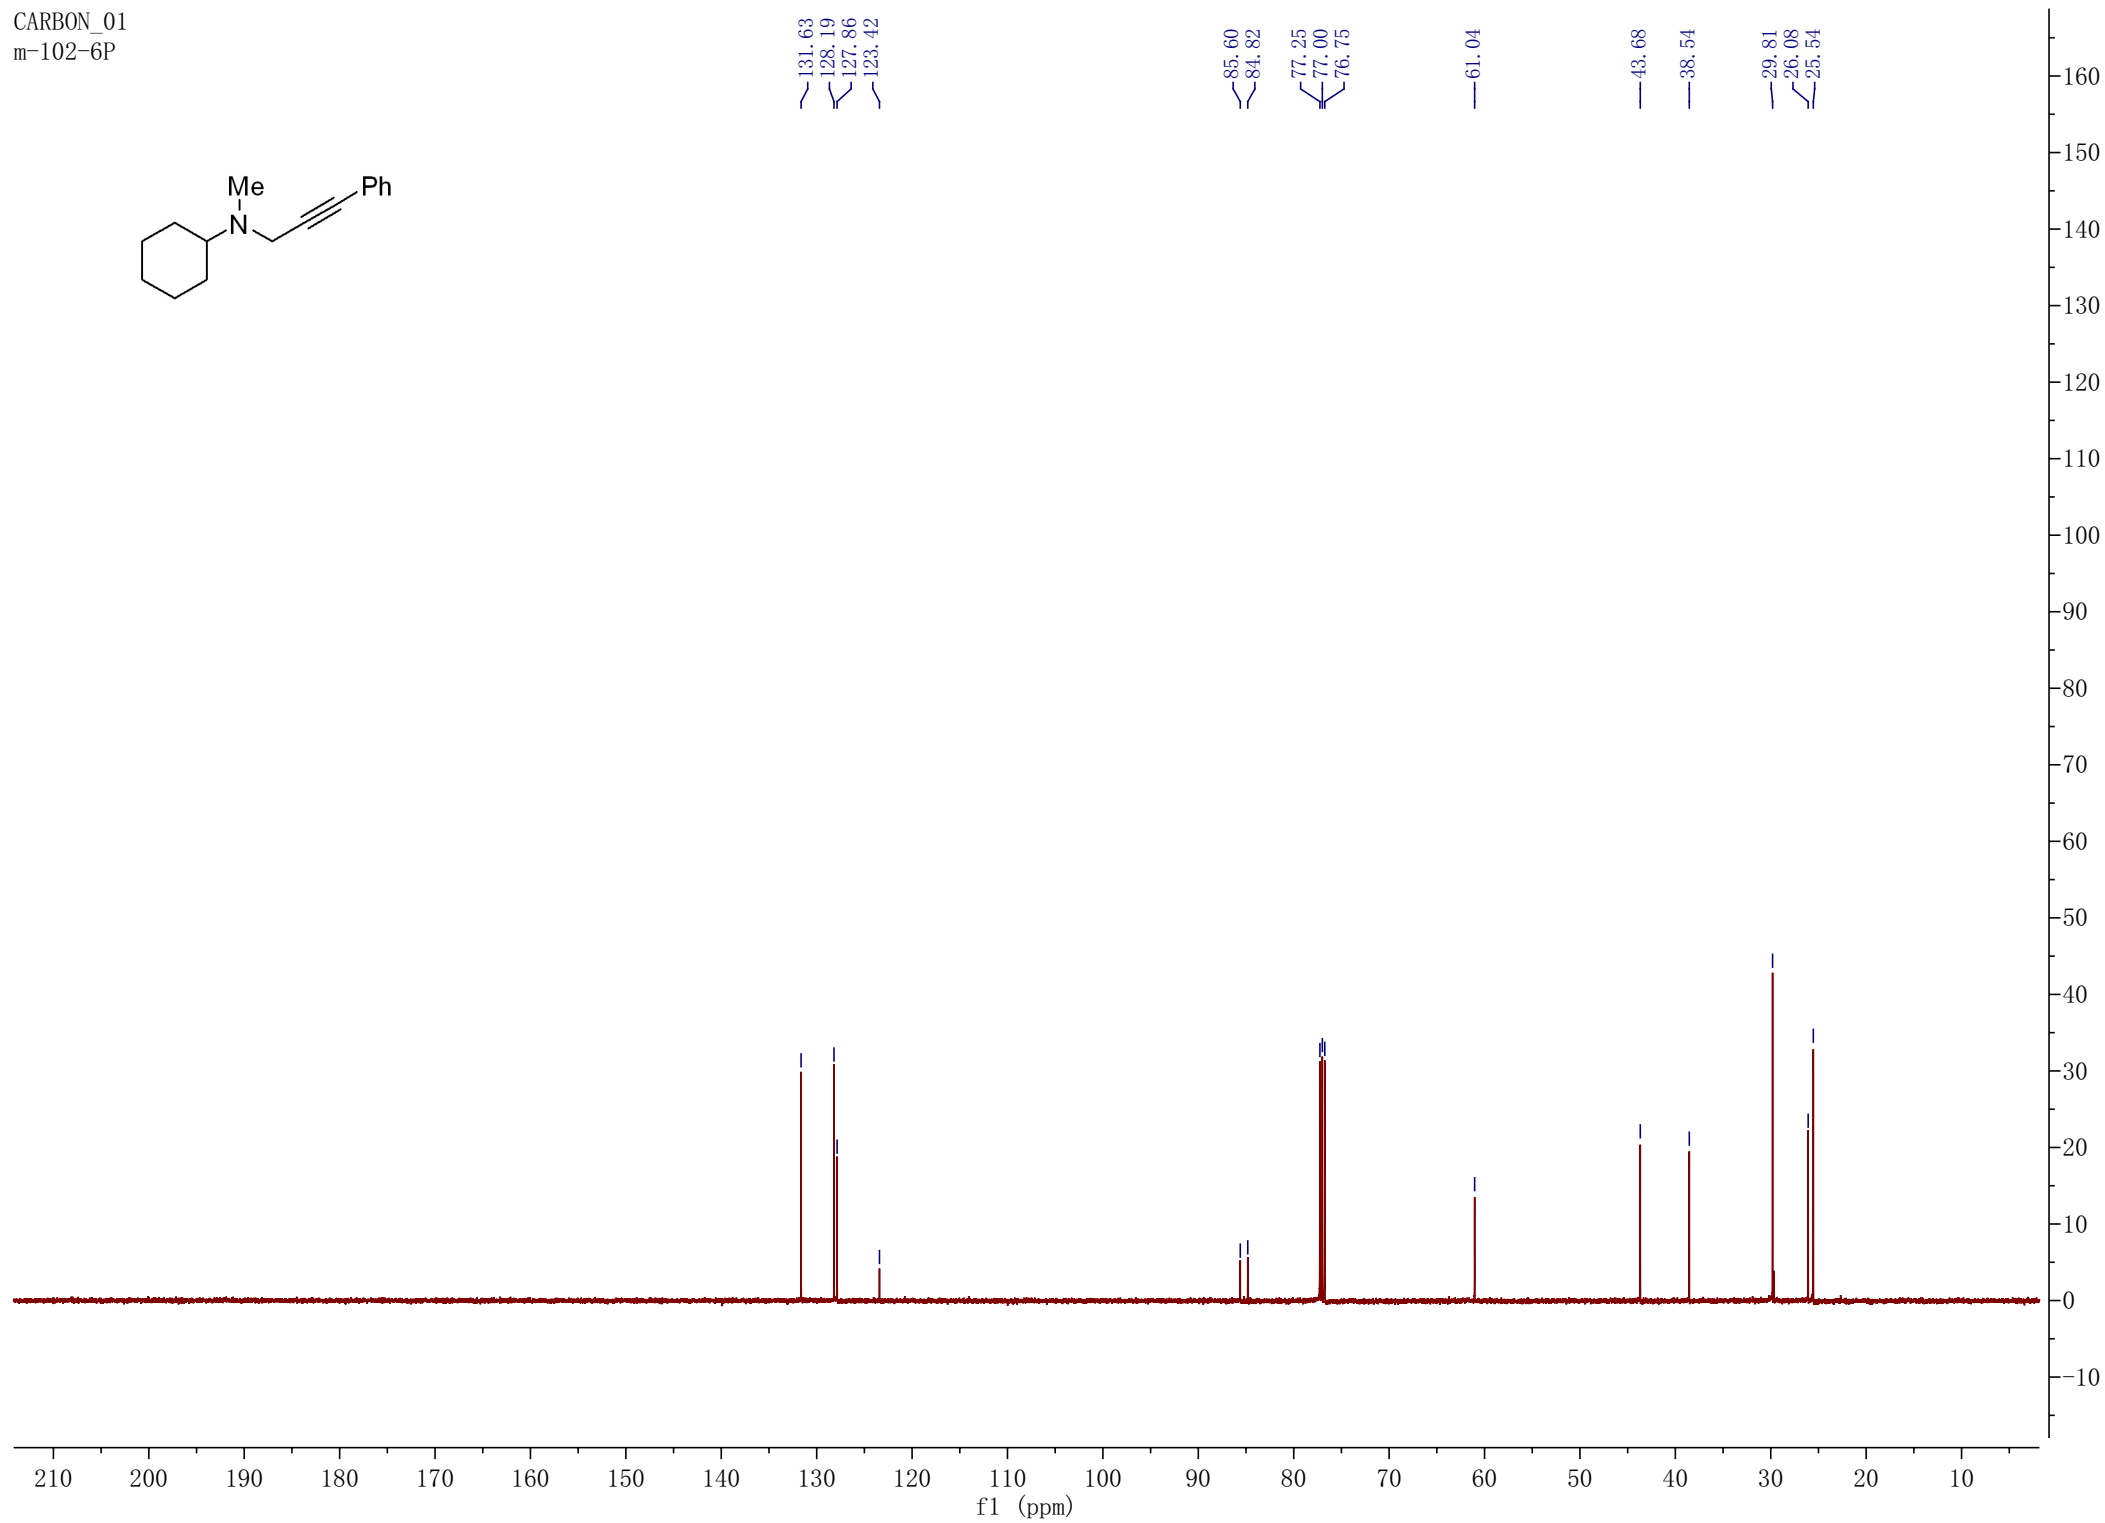

PROTON\_01  
m-102-4P

7.49  
7.48  
7.47  
7.47  
7.39  
7.37  
7.36  
7.34  
7.33  
7.32  
7.32  
7.29  
7.28  
7.26

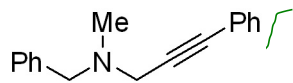

A (m)  
7.37

B (s)  
3.65

C (s)  
3.53

D (s)  
2.42

9.10

2.00  
2.07

2.98

8.5 8.0 7.5 7.0 6.5 6.0 5.5 5.0 4.5 4.0 3.5 3.0 2.5 2.0 1.5 1.0 0.5 0.0

f1 (ppm)

4500  
4000  
3500  
3000  
2500  
2000  
1500  
1000  
500  
0

CARBON\_01  
m-102-4P

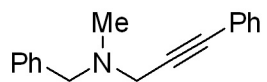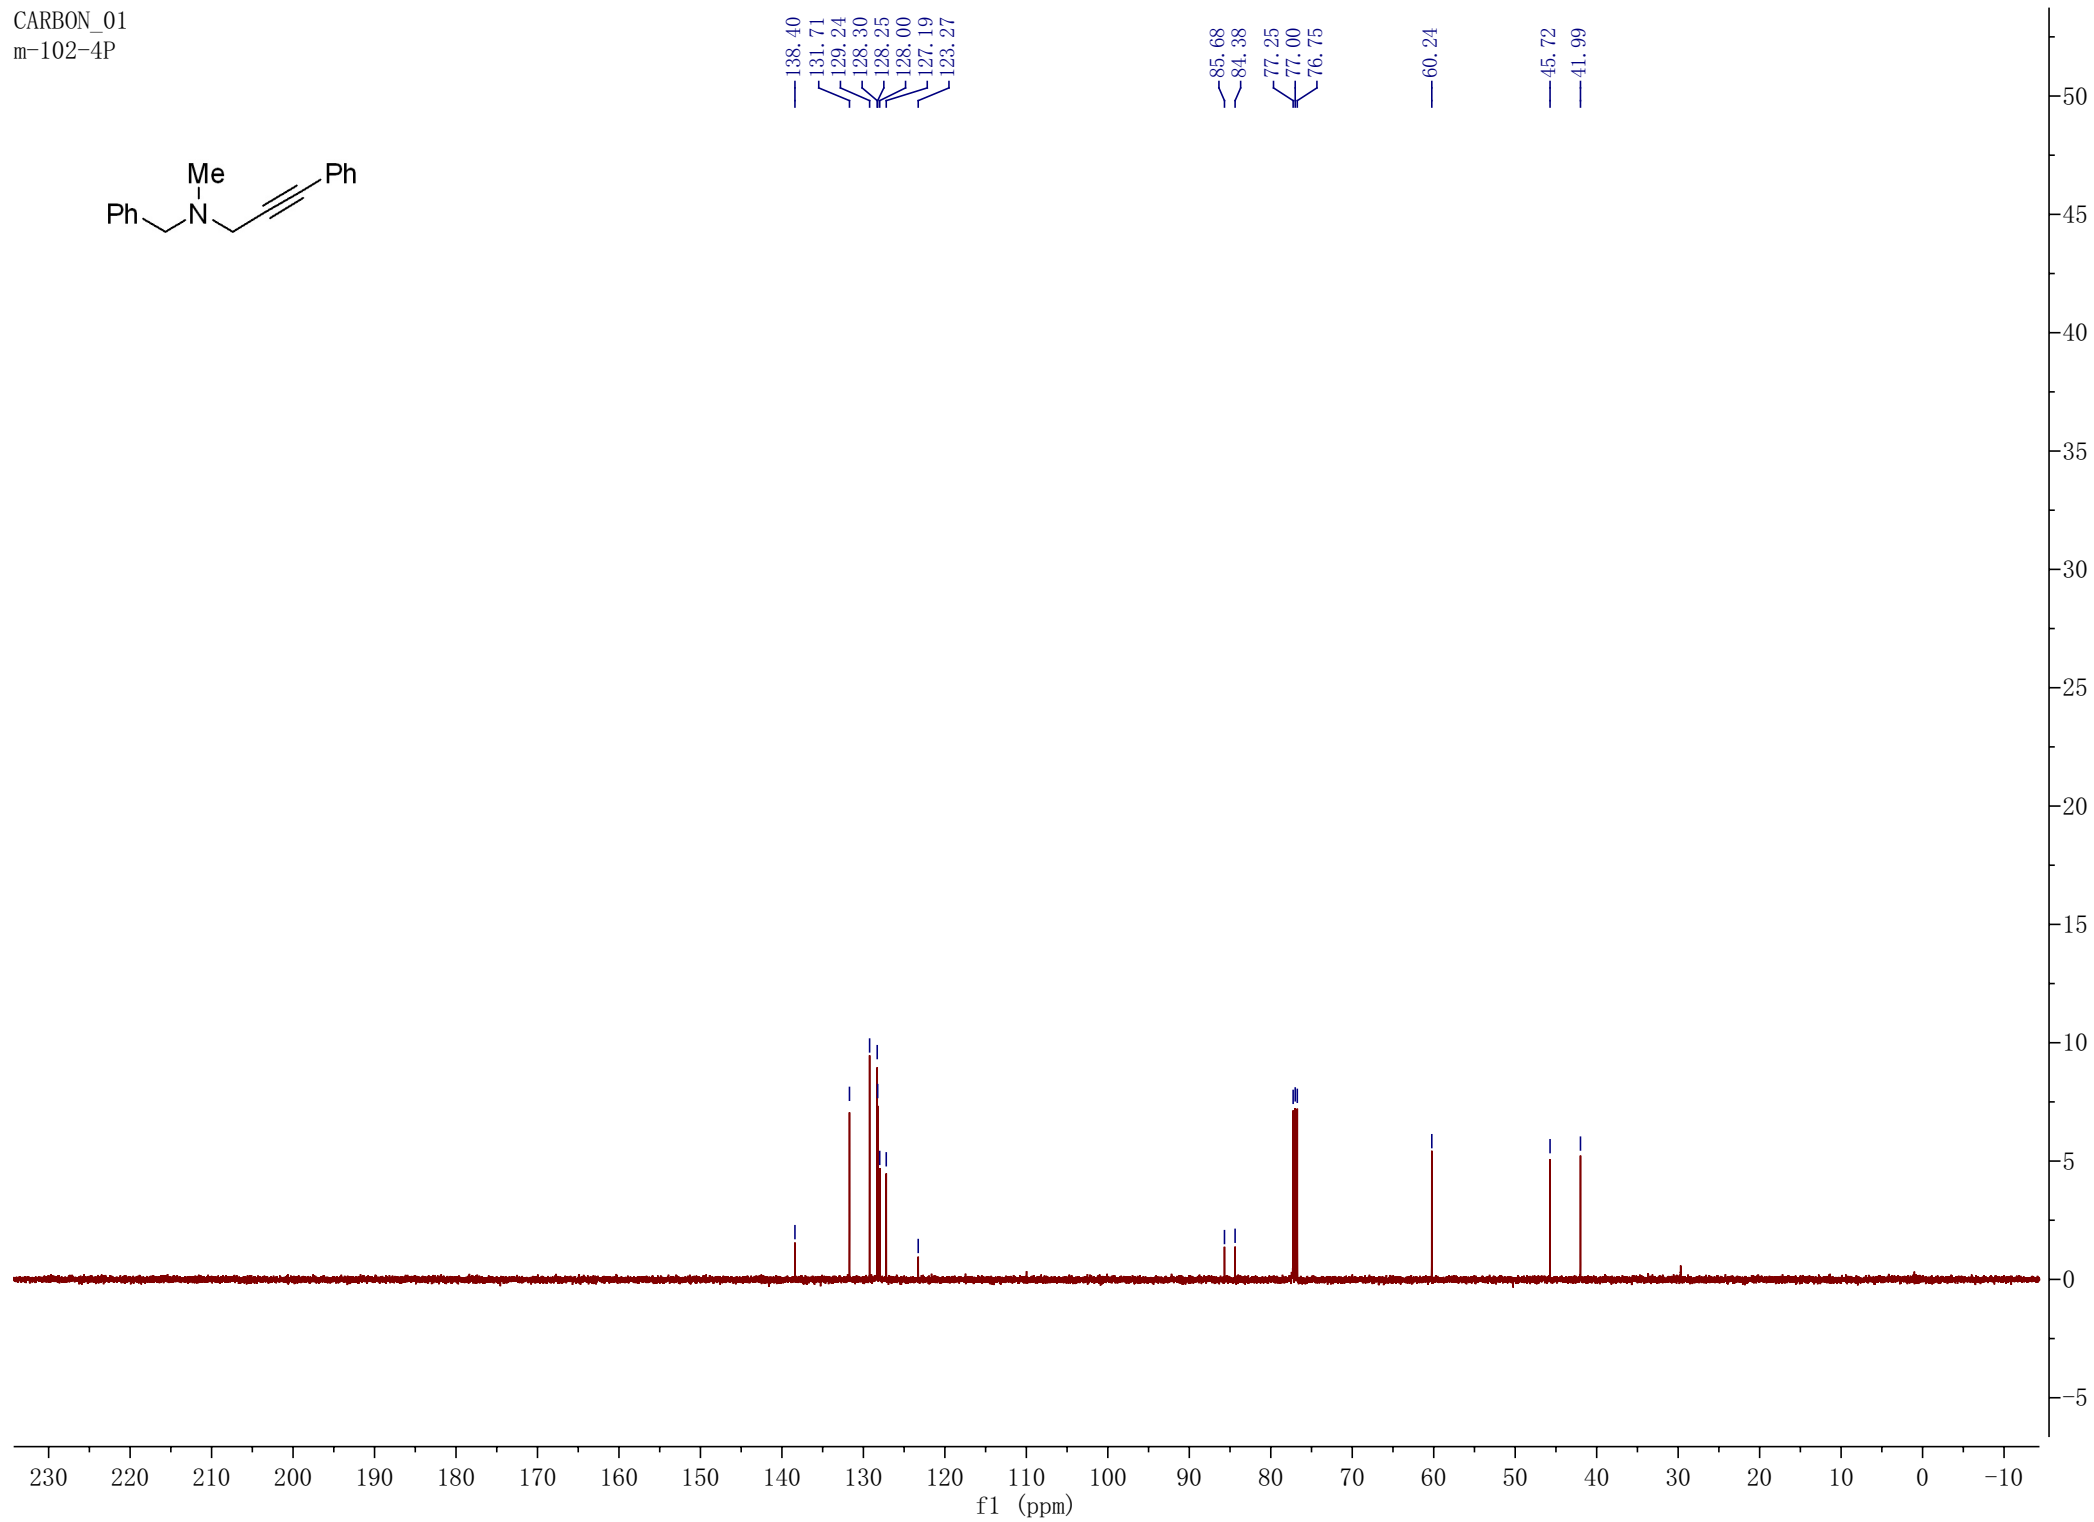

PROTON\_01  
M-102-2P

7.43  
7.42  
7.41  
7.41  
7.29  
7.28  
7.27  
7.26

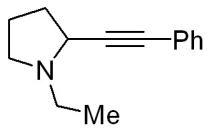

3.60  
3.59  
3.58  
3.01  
2.99  
2.98  
2.97  
2.95  
2.90  
2.89  
2.51  
2.50  
2.48  
2.19  
2.04  
2.03  
2.02  
2.01  
1.96  
1.94  
1.85  
1.84  
1.18  
1.16

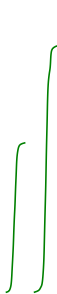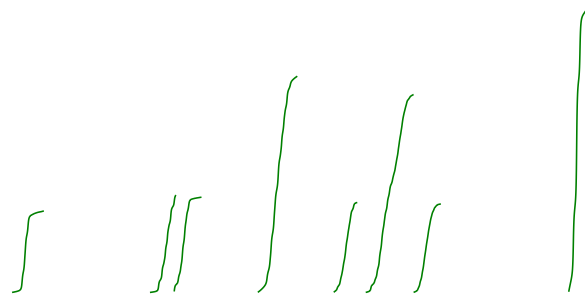

B (m)  
7.28  
A (m)  
7.42

E (m)  
2.90  
D (m)  
2.97  
G (m)  
2.19  
F (m)  
2.48  
H (m)  
1.99  
I (m)  
1.83  
J (t)  
1.18

1.84  
3.04

1.00  
1.19  
1.17  
2.65  
1.10  
2.43  
1.09  
3.51

8.5 8.0 7.5 7.0 6.5 6.0 5.5 5.0 4.5 4.0 3.5 3.0 2.5 2.0 1.5 1.0 0.5 0.0

f1 (ppm)

2800  
2600  
2400  
2200  
2000  
1800  
1600  
1400  
1200  
1000  
800  
600  
400  
200  
0  
-200

CARBON\_01  
M-102-2P

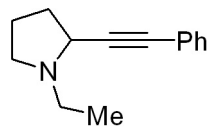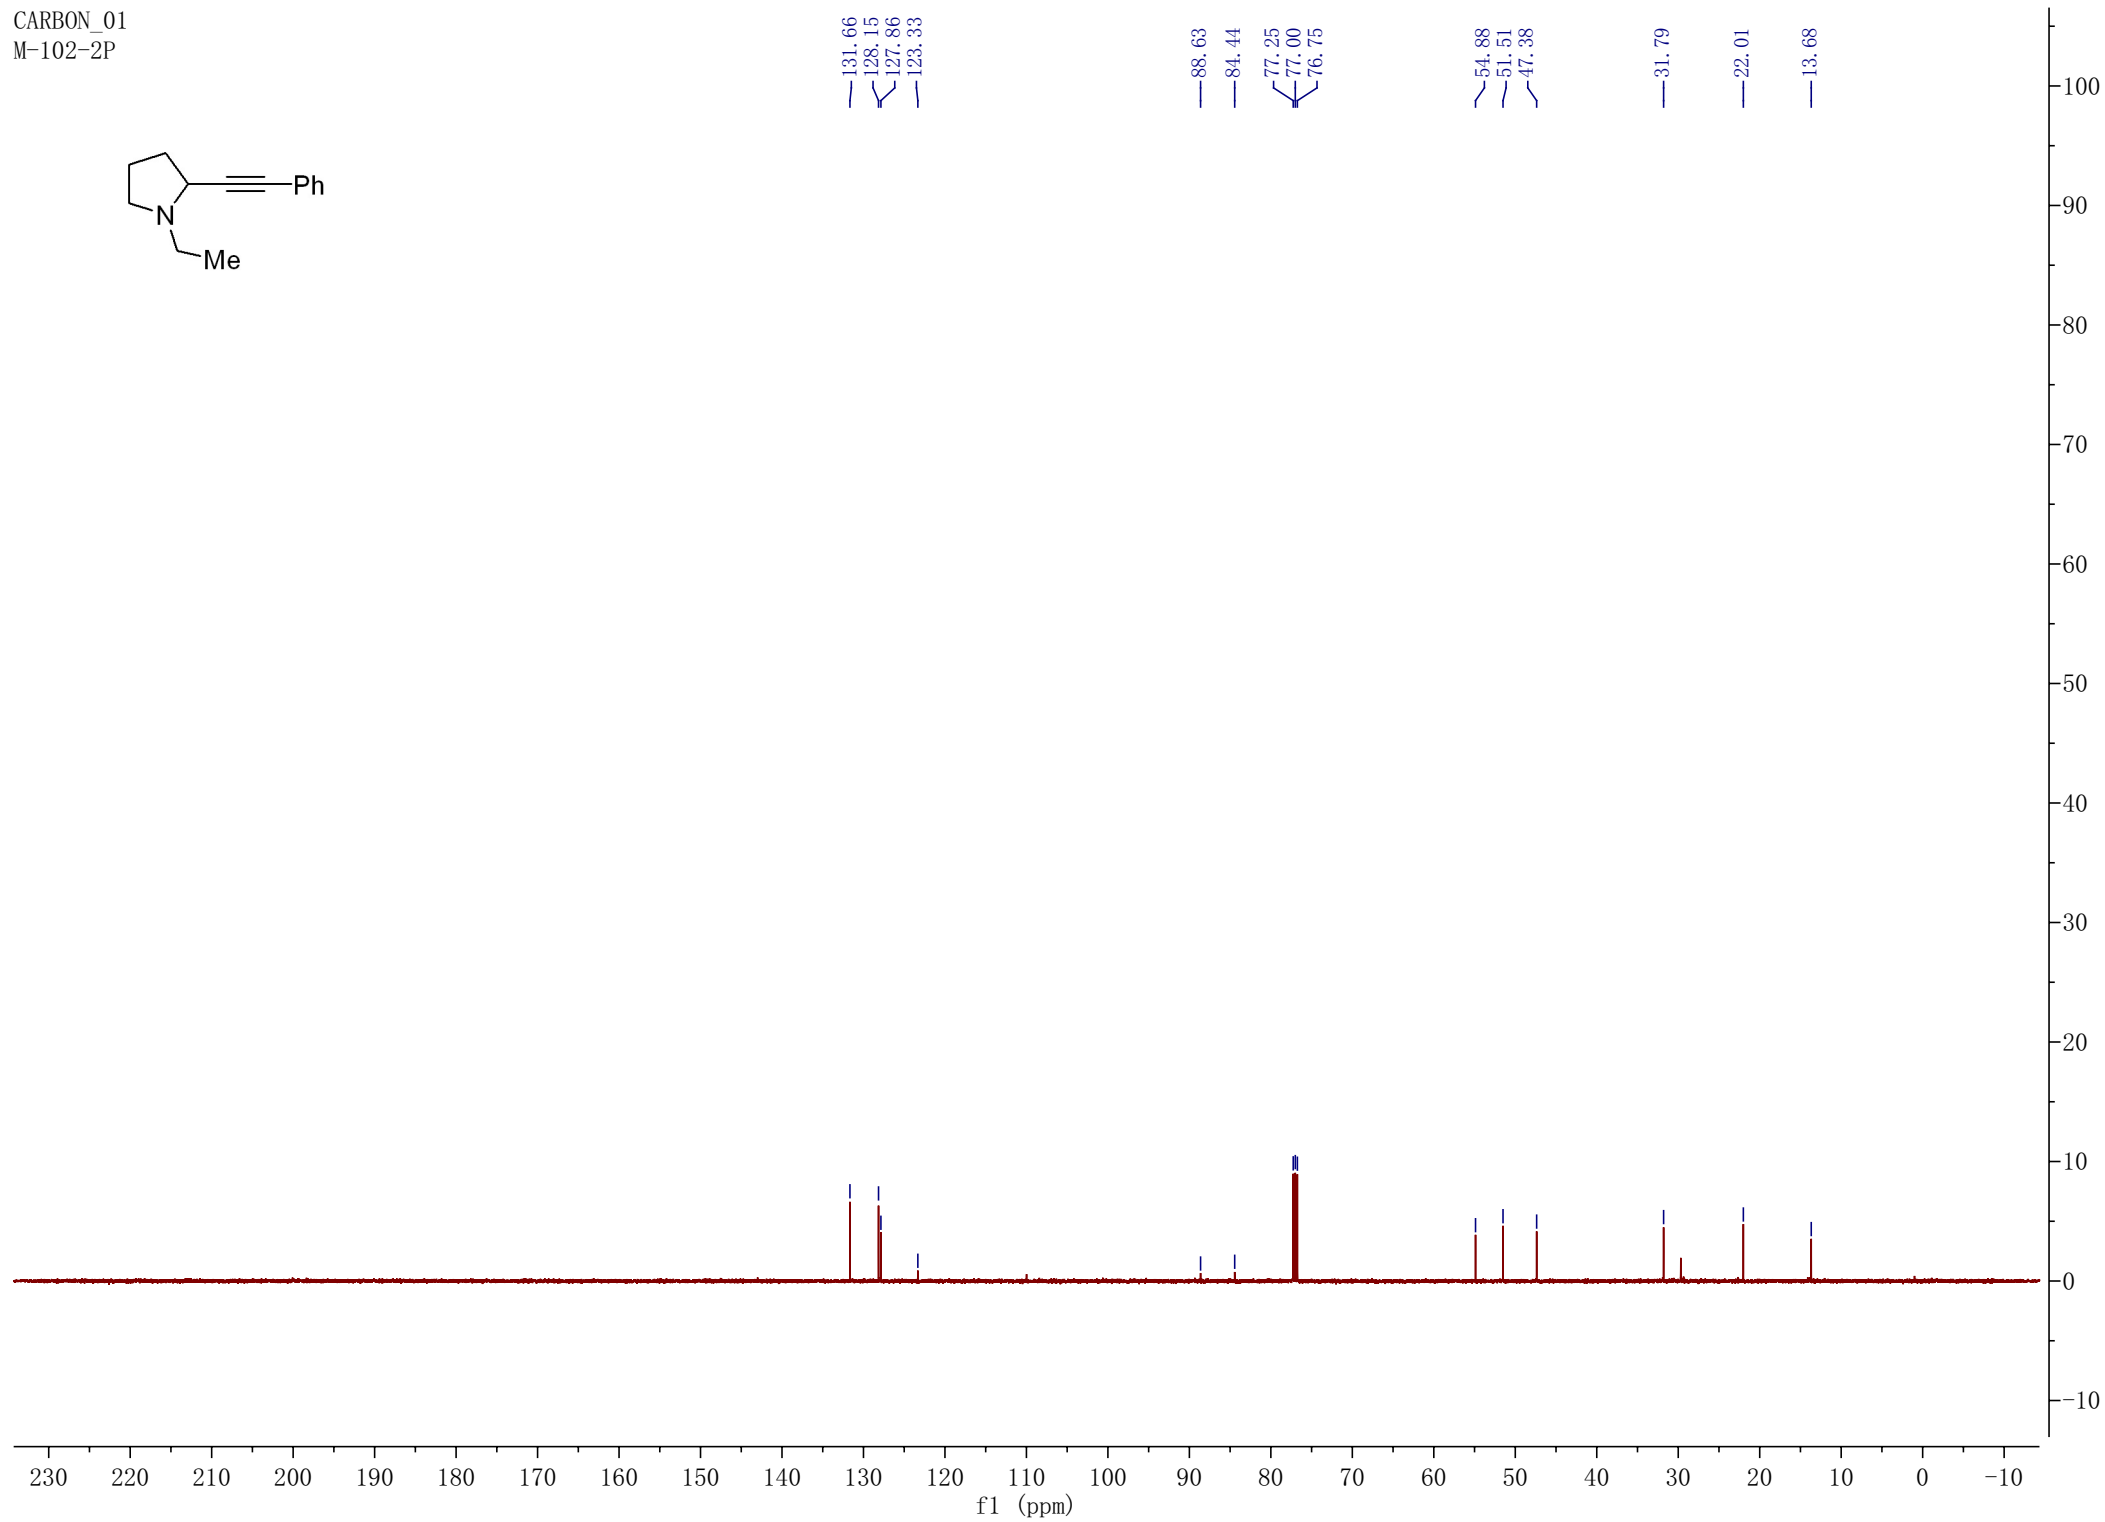

Supplement: c8qo01028e1.pdf [file c8qo01028e1.pdf]
